# Supplementary material
Source: PubMed Central journal article supplement (PMC2783566)
Supplement: NIHMS136987-supplement-2.pdf [file NIHMS136987-supplement-2.pdf]

Transcriptome profile analysis of optic nerves from wildtype (WT) and *Olig1KO* mice (> 2 fold changes)

| gene                                                                                                       | Accession | Olig1KO | WT       | fold change(WT/Olig1KO) |
|------------------------------------------------------------------------------------------------------------|-----------|---------|----------|-------------------------|
| Mbp: myelin basic protein                                                                                  | BE994609  | 2.68    | 6153.64  | 2298.67                 |
| Plp1: proteolipid protein (myelin) 1                                                                       | BB768495  | 14.97   | 4399.06  | 293.83                  |
| Gpr149: G protein-coupled receptor 149                                                                     | BB126999  | 1.71    | 501.31   | 293.25                  |
| Mbp: myelin basic protein                                                                                  | BB761376  | 25.29   | 7321.1   | 289.46                  |
| Mbp: myelin basic protein                                                                                  | AI323506  | 39.65   | 10159.34 | 256.21                  |
| Gpr17: G protein-coupled receptor 17                                                                       | BB353220  | 20.31   | 4721.11  | 232.41                  |
| Mbp: myelin basic protein                                                                                  | AV328388  | 44.51   | 9768.37  | 219.47                  |
| Mbp: myelin basic protein                                                                                  | LQ7509    | 25.2    | 5190.87  | 205.98                  |
| Sox10: SRY-box containing gene 10                                                                          | BC018551  | 1       | 165.71   | 165.71                  |
| 9630013A20Rik: RIKEN cDNA 9630013A20 gene                                                                  | BB126284  | 6.16    | 870.16   | 141.3                   |
| AI314604: expressed sequence AI314604                                                                      | BE991175  | 19.67   | 2717.82  | 138.14                  |
| Tmem163: transmembrane protein 163                                                                         | AK011522  | 9.48    | 1144.8   | 120.79                  |
| Plp1: proteolipid protein (myelin) 1                                                                       | BB768495  | 78.11   | 9057.42  | 115.95                  |
| Gm98: gene model 98, (NCBI)                                                                                | BB193557  | 13.41   | 1486.17  | 110.82                  |
| Mbp: myelin basic protein                                                                                  | NM_010777 | 54.82   | 5597.08  | 102.11                  |
| Mag: myelin-associated glycoprotein                                                                        | NM_010758 | 10.53   | 1063.54  | 100.97                  |
| 9630013A20Rik: RIKEN cDNA 9630013A20 gene                                                                  | BB247407  | 11.38   | 1140.44  | 100.23                  |
| Mobp: myelin-associated oligodendrocytic basic protein                                                     | NM_008614 | 2.92    | 256.53   | 87.93                   |
| B830045N13Rik: RIKEN cDNA B830045N13 gene                                                                  | BM942851  | 6.9     | 573.72   | 83.18                   |
| 9630013A20Rik: RIKEN cDNA 9630013A20 gene                                                                  | BB457226  | 10.79   | 847.5    | 78.53                   |
| Pdgfra: platelet derived growth factor receptor, alpha polypeptide                                         | AW537708  | 40.72   | 3089.74  | 75.88                   |
| Mobp: myelin-associated oligodendrocytic basic protein                                                     | BM899593  | 3.66    | 277.5    | 75.8                    |
| Cnga2: cyclic nucleotide gated channel alpha 2                                                             | NM_007724 | 4.3     | 295.88   | 68.86                   |
| Efemp1: epidermal growth factor-containing fibulin-like extracellular matrix protein 1                     | BC023060  | 9.64    | 646.35   | 67.02                   |
| Prkq: protein kinase C, theta                                                                              | AB062122  | 25.13   | 1442.04  | 57.39                   |
| Lims2: LIM and senescent cell antigen like domains 2                                                       | BC010816  | 35.69   | 2043.48  | 57.26                   |
| Gpr149: G protein-coupled receptor 149                                                                     | BB075339  | 12.11   | 679.1    | 56.06                   |
| Rin2: Ras and Rab interactor 2                                                                             | AK014548  | 14.68   | 772.14   | 52.58                   |
| Sox10: SRY-box containing gene 10                                                                          | BC018551  | 33.37   | 1723.34  | 51.64                   |
| Cldn11: claudin 11                                                                                         | NM_008770 | 64.82   | 3316.82  | 51.17                   |
| Ugt8a: UDP galactosyltransferase 8A                                                                        | NM_011674 | 81.76   | 4161.16  | 50.89                   |
| Sic1a1: solute carrier family 1 (neuronal/epithelial high affinity glutamate transporter, system Xag),     | AF087578  | 17.75   | 849.99   | 47.89                   |
| 2900052N01Rik: RIKEN cDNA 2900052N01 gene                                                                  | AU067665  | 27.81   | 1283.8   | 46.17                   |
| Hspb8: heat shock protein 8                                                                                | AF250139  | 28.47   | 1106.06  | 38.84                   |
| Tmeff2: transmembrane protein with EGF-like and two follistatin-like domains 2                             | AV246773  | 37.63   | 1430.35  | 38.01                   |
| Ugt8a: UDP galactosyltransferase 8A                                                                        | NM_011674 | 47.99   | 1733.46  | 36.12                   |
| Bmp4: bone morphogenetic protein 4                                                                         | NM_007554 | 33.67   | 1191.53  | 35.39                   |
| Sic1a1: solute carrier family 1 (neuronal/epithelial high affinity glutamate transporter, system Xag),     | U75214    | 53.9    | 1885.24  | 34.98                   |
| Sic1a1: solute carrier family 1 (neuronal/epithelial high affinity glutamate transporter, system Xag),     | NM_009199 | 69.42   | 2359.53  | 33.99                   |
| Sned1: sushi, nidogen and EGF-like domains 1                                                               | BB487754  | 6.31    | 210.83   | 33.44                   |
| Bcas1: breast carcinoma amplified sequence 1                                                               | AK008957  | 231.08  | 7491.66  | 32.42                   |
| Agt: angiotensinogen (serpin peptidase inhibitor, clade A, member 8)                                       | AK018763  | 58.97   | 1859.14  | 31.53                   |
| S100b: S100 protein, beta polypeptide, neural                                                              | BB316114  | 50.3    | 1563.17  | 31.08                   |
| Pcdh15: protocadherin 15                                                                                   | BE984978  | 7.32    | 226.69   | 30.98                   |
| Lhfp13: Lipoma HMGIC fusion partner-like 3                                                                 | BB309408  | 48.1    | 1458.31  | 30.32                   |
| Hif1a: Hypoxia inducible factor 1, alpha subunit                                                           | BB409314  | 8.59    | 256.33   | 29.84                   |
| Fa2h: fatty acid 2-hydroxylase                                                                             | BM118638  | 34.88   | 1021.46  | 29.29                   |
| Enpp2: ectonucleotide pyrophosphatase/phosphodiesterase 2                                                  | BC003264  | 90.71   | 2651.8   | 29.23                   |
| Dnm3: dynamin 3                                                                                            | BB709245  | 34.07   | 970.51   | 28.49                   |
| 15 days embryo head cDNA, RIKEN full-length enriched library, clone:D930025C07 product:unclassified        | BB284627  | 38.46   | 1055.98  | 27.45                   |
| Pcdh15: protocadherin 15                                                                                   | BB078305  | 35.47   | 947.95   | 26.72                   |
| Adult male olfactory brain cDNA, RIKEN full-length enriched library, clone:6430531K17 product:unclassified | BF456098  | 113.68  | 3003.88  | 26.42                   |
| S100b: S100 protein, beta polypeptide, neural                                                              | NM_009115 | 46.89   | 1233.69  | 26.31                   |
| Sema3d: sema domain, immunoglobulin domain (Ig), short basic domain, secreted, (semaphorin) 3I             | BB499147  | 24      | 626.06   | 26.09                   |
| Transcribed locus                                                                                          | BB629079  | 5.44    | 139.7    | 25.7                    |
| Ran: RAN, member RAS oncogene family                                                                       | BB802543  | 6.44    | 164.8    | 25.59                   |
| Lhfp13: lipoma HMGIC fusion partner-like 3                                                                 | BQ175687  | 96.88   | 2477.28  | 25.57                   |
| Srpk3: serine/arginine-rich protein specific kinase 3                                                      | BB036235  | 25.51   | 649.2    | 25.45                   |
| Adult male hippocampus cDNA, RIKEN full-length enriched library, clone:C630020O05 product:unclassified     | BB428710  | 9.59    | 240.22   | 25.04                   |
| Transcribed locus                                                                                          | BE692021  | 119.61  | 2986.34  | 24.97                   |
| Mm.220264.1                                                                                                | BB371911  | 10.65   | 265.85   | 24.97                   |
| Pdgfra: platelet derived growth factor receptor, alpha polypeptide                                         | AW537708  | 35.05   | 840.28   | 23.97                   |
| Elovl7: ELOVL family member 7, elongation of long chain fatty acids (yeast)                                | BC005602  | 23.16   | 553.09   | 23.88                   |
| LOC552873: hypothetical LOC552873                                                                          | BG075804  | 16.44   | 379.54   | 23.08                   |
| Lgi3: leucine-rich repeat LGI family, member 3                                                             | BB187947  | 39.61   | 911.09   | 23                      |
| Lhfp13: lipoma HMGIC fusion partner-like 3                                                                 | BB274911  | 51.99   | 1187.75  | 22.84                   |
| Elovl7: ELOVL family member 7, elongation of long chain fatty acids (yeast)                                | BC005602  | 30.95   | 698.43   | 22.57                   |
| Ddo: D-aspartate oxidase                                                                                   | BB021589  | 7.09    | 158.63   | 22.36                   |
| Hspb8: heat shock protein 8                                                                                | BB764222  | 67.06   | 1498.14  | 22.34                   |
| Postn: periostin, osteoblast specific factor                                                               | BI110565  | 9.64    | 214.25   | 22.24                   |
| Parvb: parvin, beta                                                                                        | BI134721  | 52.48   | 1130.32  | 21.54                   |
| Hspb8: heat shock protein 8                                                                                | AF250139  | 37.22   | 795.63   | 21.38                   |
| 15 days embryo head cDNA, RIKEN full-length enriched library, clone:D930025C07 product:unclassified        | BB183456  | 37.62   | 802.66   | 21.33                   |
| Ddc: dopa decarboxylase                                                                                    | AF071068  | 44.34   | 930.87   | 20.99                   |
| Nfasc: Neurofascin                                                                                         | BB387126  | 43.21   | 907.15   | 20.99                   |
| Enpp2: ectonucleotide pyrophosphatase/phosphodiesterase 2                                                  | BC003264  | 78.14   | 1636.65  | 20.95                   |
| Gal3st1: galactose-3-O-sulfotransferase 1                                                                  | AK002510  | 48.76   | 1021.26  | 20.94                   |
| Elovl7: ELOVL family member 7, elongation of long chain fatty acids (yeast)                                | BB149977  | 20.36   | 416.31   | 20.45                   |
| Kcnd2: Potassium voltage-gated channel, Shal-related family, member 2                                      | BB472451  | 83.14   | 1687.88  | 20.3                    |
| Ppp1r16b: protein phosphatase 1, regulatory (inhibitor) subunit 16B                                        | BB375209  | 101.66  | 2024.33  | 19.91                   |
| Smap1: stromal membrane-associated protein 1                                                               | AK014888  | 10.62   | 209.77   | 19.74                   |
| Sgcg: sarcoglycan, gamma (dystrophin-associated glycoprotein)                                              | BB519683  | 5.99    | 111.42   | 18.61                   |
| Cyfp2: cytoplasmic FMR1 interacting protein 2                                                              | NM_133769 | 66.03   | 1228.21  | 18.6                    |
| 9630027E11: hypothetical protein 9630027E11                                                                | BM899529  | 84.1    | 1561.89  | 18.57                   |
| C030036D22Rik: RIKEN cDNA C030036D22 gene                                                                  | BB264612  | 48.14   | 891.3    | 18.51                   |
| Igsf4d: immunoglobulin superfamily, member 4                                                               | BB333386  | 50.81   | 938.55   | 18.47                   |

|                                                                                                    |           |        |         |       |
|----------------------------------------------------------------------------------------------------|-----------|--------|---------|-------|
| Transcribed locus                                                                                  | BQ175164  | 22.08  | 396.56  | 17.96 |
| Omg: oligodendrocyte myelin glycoprotein                                                           | NM_019409 | 69.98  | 1249.61 | 17.86 |
| Zfp185: zinc finger protein 185                                                                    | AK014497  | 9.14   | 162.6   | 17.79 |
| Cyp4f15: cytochrome P450, family 4, subfamily f, polypeptide 15                                    | NM_134127 | 8.63   | 150.51  | 17.43 |
| Ptpre: protein tyrosine phosphatase, receptor type, E                                              | U35368    | 112.09 | 1950.21 | 17.4  |
| Slc8a3: solute carrier family 8 (sodium/calcium exchanger), member 3                               | AV361504  | 21.49  | 363.51  | 16.91 |
| 5730559C18Rik: RIKEN cDNA 5730559C18 gene                                                          | BF580053  | 84.59  | 1417.48 | 16.76 |
| LOC675405: similar to voltage gated channel like 1                                                 | BE861826  | 37.97  | 622     | 16.38 |
| 3110080E11Rik: RIKEN cDNA 3110080E11 gene                                                          | BB367686  | 31.05  | 506.28  | 16.31 |
| 10 days neonate cortex cDNA, RIKEN full-length enriched library, clone:A830044L07 product:unclass  | AW121365  | 27.35  | 444.73  | 16.26 |
| Kcnd2: potassium voltage-gated channel, Shal-related family, member 2                              | BB051684  | 69.16  | 1107.59 | 16.01 |
| Aqp4: aquaporin 4                                                                                  | AW489155  | 191.62 | 3068.12 | 16.01 |
| Epb4.1I2: erythrocyte protein band 4.1-like 2                                                      | AJ245854  | 19.57  | 309.04  | 15.8  |
| Kcnd2: Potassium voltage-gated channel, Shal-related family, member 2                              | AW557538  | 82.21  | 1293.59 | 15.74 |
| Mm.207738.1                                                                                        | AV341003  | 26.04  | 408.68  | 15.7  |
| Csmd1: CUB and Sushi multiple domains 1                                                            | BB179947  | 22.1   | 344.28  | 15.58 |
| Dsnd2: dysbindin (dystrobrevin binding protein 1) domain containing 2                              | BE949296  | 22.47  | 348.73  | 15.52 |
| Transcribed locus                                                                                  | AU042527  | 16.82  | 255.23  | 15.18 |
| Plxn3: plexin B3                                                                                   | NM_019587 | 59.68  | 904.29  | 15.15 |
| Kcnd2: potassium voltage-gated channel, Shal-related family, member 2                              | BB051684  | 62.23  | 942.68  | 15.15 |
| 6330510M09Rik: RIKEN cDNA 6330510M09 gene                                                          | AK018211  | 20.02  | 301.16  | 15.04 |
| Kcnd2: potassium voltage-gated channel, Shal-related family, member 2                              | BB051684  | 161.82 | 2427.35 | 15    |
| 2900052N01Rik: RIKEN cDNA 2900052N01 gene                                                          | BB426699  | 28.44  | 421.23  | 14.81 |
| Nfe2l3: nuclear factor, erythroid derived 2, like 3                                                | NM_010903 | 20.18  | 298.05  | 14.77 |
| Cbln2: cerebellin 2 precursor protein                                                              | BQ175551  | 31.34  | 458.59  | 14.63 |
| C920006O11Rik: RIKEN cDNA C920006O11 gene                                                          | BB552195  | 17.92  | 262.06  | 14.63 |
| Elov17: ELOVL family member 7, elongation of long chain fatty acids (yeast)                        | BB338945  | 68.26  | 997.73  | 14.62 |
| Grin3a: glutamate receptor ionotropic, NMDA3A                                                      | BQ174802  | 43.46  | 634.86  | 14.61 |
| Plp1: proteolipid protein (myelin) 1                                                               | BB768495  | 231.14 | 3373.28 | 14.59 |
| 4833424O15Rik: RIKEN cDNA 4833424O15 gene                                                          | AV334098  | 20.82  | 297.81  | 14.31 |
| IgSF4d: immunoglobulin superfamily, member 4                                                       | BB333386  | 185.1  | 2635.27 | 14.24 |
| 9030409G11Rik: RIKEN cDNA 9030409G11 gene                                                          | AV345336  | 13.77  | 195.12  | 14.17 |
| Abhd3: abhydrolase domain containing 3                                                             | NM_134130 | 130.56 | 1834.73 | 14.05 |
| Plxn3: plexin B3                                                                                   | A1451018  | 150.91 | 2114.72 | 14.01 |
| Adult male corpora quadrigemina cDNA, RIKEN full-length enriched library, clone:B230366E07 produ   | BE955519  | 11.96  | 163.86  | 13.7  |
| A230069A22Rik: RIKEN cDNA A230069A22 gene                                                          | AV327597  | 47.66  | 650.17  | 13.64 |
| Plcg2: phospholipase C, gamma 2                                                                    | AW546508  | 38.81  | 529.05  | 13.63 |
| Aqp4: aquaporin 4                                                                                  | U48399    | 409.8  | 5583.05 | 13.62 |
| Cmtm5: CKLF-like MARVEL transmembrane domain containing 5                                          | AK013666  | 86.62  | 1165.66 | 13.46 |
| Bmp6: bone morphogenetic protein 6                                                                 | NM_007556 | 17.35  | 231.76  | 13.36 |
| Abca8a: ATP-binding cassette, sub-family A (ABC1), member 8a                                       | BC026496  | 24.69  | 325.83  | 13.2  |
| Dsnd2: Dysbindin (dystrobrevin binding protein 1) domain containing 2                              | AU067707  | 57.87  | 758.22  | 13.1  |
| Mpa2l /// LOC626578 /// LOC673101: macrophage activation 2 like /// similar to macrophage activa   | BM241485  | 17.26  | 224.63  | 13.01 |
| Kctd4: potassium channel tetramerisation domain containing 4                                       | A1843843  | 34.39  | 441.87  | 12.85 |
| IgSF4d: Immunoglobulin superfamily, member 4                                                       | BB312687  | 16.29  | 209.14  | 12.84 |
| Tmem45a: transmembrane protein 45a                                                                 | NM_019631 | 9.27   | 118     | 12.73 |
| Galnt13: UDP-N-acetyl-alpha-D-galactosamine:polypeptide N-acetylgalactosaminyltransferase 13       | BE995677  | 12.53  | 158.59  | 12.66 |
| Pcdhb9: protocadherin beta 9                                                                       | NM_053134 | 28.02  | 352.05  | 12.56 |
| Phca: phytoceramidase, alkaline                                                                    | BB329313  | 33.98  | 419.89  | 12.36 |
| Dll3: delta-like 3 (Drosophila)                                                                    | AB013440  | 162.9  | 1994.35 | 12.24 |
| Dscam: Down syndrome cell adhesion molecule                                                        | NM_031174 | 59.97  | 730.87  | 12.19 |
| Lsamp: limbic system-associated membrane protein                                                   | BB319385  | 77.8   | 930.83  | 11.96 |
| B930018B01: hypothetical protein B930018B01                                                        | BB339393  | 11.24  | 133.93  | 11.92 |
| 9630021D06Rik: RIKEN cDNA 9630021D06 gene                                                          | BB127374  | 12.56  | 148.81  | 11.85 |
| Tmeff2: transmembrane protein with EGF-like and two follistatin-like domains 2                     | NM_019790 | 262.57 | 3105.37 | 11.83 |
| IgSF4d: immunoglobulin superfamily, member 4                                                       | BB333386  | 108.09 | 1276.4  | 11.81 |
| Dcc: Deleted in colorectal carcinoma                                                               | BE824778  | 125.33 | 1466.74 | 11.7  |
| ErbB4: V-erb-a erythroblastic leukemia viral oncogene homolog 4 (avian)                            | BB386653  | 30.57  | 355.71  | 11.63 |
| 10 days neonate cortex cDNA, RIKEN full-length enriched library, clone:A830014C22 product:unclass  | BQ175183  | 25.67  | 298.66  | 11.63 |
| IgSF4d: immunoglobulin superfamily, member 4                                                       | BB543585  | 105.78 | 1219.73 | 11.53 |
| Skiv2l2: superkiller viralicidic activity 2-like 2 (S. cerevisiae)                                 | BM208991  | 15.61  | 179.3   | 11.49 |
| Fxyd1: FXD domain-containing ion transport regulator 1                                             | NM_019503 | 72.19  | 828.49  | 11.48 |
| Adult male spinal cord cDNA, RIKEN full-length enriched library, clone:A330040D20 product:unclassi | AW123117  | 50.52  | 574.83  | 11.38 |
| Dnm3: dynamin 3                                                                                    | BB212531  | 33.13  | 376.1   | 11.35 |
| Dnm3: dynamin 3                                                                                    | BB130476  | 55.85  | 624.65  | 11.19 |
| Ptpre: protein tyrosine phosphatase, receptor type, E                                              | U35368    | 89.04  | 995.33  | 11.18 |
| A330076H08Rik: RIKEN cDNA A330076H08 gene                                                          | BB378962  | 81.91  | 908.97  | 11.1  |
| 4632411J06Rik: RIKEN cDNA 4632411J06 gene                                                          | BB003906  | 17.32  | 191.81  | 11.08 |
| Gpr37l1: G protein-coupled receptor 37-like 1                                                      | AB016602  | 47.1   | 517.88  | 11    |
| D930002L09Rik: RIKEN cDNA D930002L09 gene                                                          | BB560393  | 42.26  | 459.33  | 10.87 |
| Ext1: Exostosins (multiple) 1                                                                      | BM231698  | 20.5   | 219.6   | 10.71 |
| Pcdhb10: protocadherin beta 10                                                                     | NM_053135 | 20.79  | 221.59  | 10.66 |
| Dmrt1: doublesex and mab-3 related transcription factor like family A1                             | BB461344  | 20.48  | 218.28  | 10.66 |
| Oplah: 5-oxoprolinase (ATP-hydrolysing)                                                            | BC025120  | 24.85  | 264.4   | 10.64 |
| Pde4b: Phosphodiesterase 4B, cAMP specific                                                         | BE950979  | 18.54  | 196.6   | 10.6  |
| 6330532G10Rik: RIKEN cDNA 6330532G10 gene                                                          | BB311937  | 10.51  | 111.35  | 10.6  |
| Ntrk2: neurotrophic tyrosine kinase, receptor, type 2                                              | AK018789  | 38.27  | 404.39  | 10.57 |
| Capn5: calpain 5                                                                                   | BC014767  | 48.08  | 506.88  | 10.54 |
| Ncam2: neural cell adhesion molecule 2                                                             | AF001287  | 48.01  | 502.96  | 10.48 |
| 2900078E11Rik: RIKEN cDNA 2900078E11 gene                                                          | BQ174746  | 206.41 | 2162.51 | 10.48 |
| Transcribed locus                                                                                  | BE650754  | 64.28  | 671.16  | 10.44 |
| Matn4: matrilin 4                                                                                  | NM_013592 | 44.98  | 468.48  | 10.42 |
| Galc: galactosylceramidase                                                                         | AK010101  | 51.74  | 529.68  | 10.24 |
| Grin3a: glutamate receptor ionotropic, NMDA3A                                                      | BB305883  | 61.12  | 625.69  | 10.24 |
| Fgf1: fibroblast growth factor 1                                                                   | A1649186  | 49.82  | 508.95  | 10.22 |
| LOC675405: similar to voltage gated channel like 1                                                 | A1849508  | 67.78  | 689.49  | 10.17 |
| 6430550H21Rik: RIKEN cDNA 6430550H21 gene                                                          | AV280875  | 13.63  | 138.52  | 10.16 |
| Phkg1: phosphorylase kinase gamma 1                                                                | J03293    | 11.86  | 120.12  | 10.13 |
| Fkbp3: FK506 binding protein 3                                                                     | BG068268  | 23.22  | 234.26  | 10.09 |

|                                                                                                       |           |        |         |       |
|-------------------------------------------------------------------------------------------------------|-----------|--------|---------|-------|
| B230215L15Rik: RIKEN cDNA B230215L15 gene                                                             | BB307661  | 141.3  | 1417.72 | 10.03 |
| Mm.208359.1                                                                                           | BB257461  | 38.26  | 381.81  | 9.98  |
| Cntn1: contactin 1                                                                                    | AK004399  | 344.4  | 3434.41 | 9.97  |
| Car5b: carbonic anhydrase 5b, mitochondrial                                                           | BE132973  | 19.65  | 195.63  | 9.96  |
| 1810015C04Rik: RIKEN cDNA 1810015C04 gene                                                             | BC019494  | 93.47  | 923.38  | 9.88  |
| Pramel3 /// AV320801 /// EG666040: preferentially expressed antigen in melanoma-like 3 /// expr:      | NM_031390 | 15.06  | 147.38  | 9.78  |
| Mbp: myelin basic protein                                                                             | BB181247  | 55.16  | 537.49  | 9.74  |
| Tmem166: transmembrane protein 166                                                                    | BC027150  | 28.09  | 273.02  | 9.72  |
| Pacrg: Park2 co-regulated                                                                             | AK005771  | 190.41 | 1850.17 | 9.72  |
| Dusp15: dual specificity phosphatase-like 15                                                          | AF357887  | 31.92  | 310.05  | 9.71  |
| 9630031F12Rik: RIKEN cDNA 9630031F12 gene                                                             | BB128528  | 12.79  | 123.78  | 9.67  |
| Cyp2j6: cytochrome P450, family 2, subfamily j, polypeptide 6                                         | AV373767  | 82.35  | 795.25  | 9.66  |
| Tcp11l2: t-complex 11 (mouse) like 2                                                                  | BM245221  | 151.97 | 1468.2  | 9.66  |
| Tmem100: transmembrane protein 100                                                                    | NM_026433 | 68.53  | 661.29  | 9.65  |
| Aqp4: aquaporin 4                                                                                     | BB193413  | 683.88 | 6558.55 | 9.59  |
| A930017N06Rik: RIKEN cDNA A930017N06 gene                                                             | BB279531  | 22.63  | 216.43  | 9.56  |
| Adamt5: a disintegrin-like and metalloproteinase (reprolysin type) with thrombospondin type 1 moti    | BB658835  | 12.75  | 121.65  | 9.54  |
| Phactr3: phosphatase and actin regulator 3                                                            | AV339670  | 73.1   | 694.83  | 9.51  |
| Padi2 /// LOC638935: peptidyl arginine deiminase, type II /// similar to peptidyl arginine deiminase, | NM_008812 | 117.49 | 1111.61 | 9.46  |
| Cntnap2: contactin associated protein-like 2                                                          | AU079588  | 151.61 | 1428.32 | 9.42  |
| Epb4.1l3: erythrocyte protein band 4.1-like 3                                                         | AF177146  | 20.6   | 191.63  | 9.3   |
| Cntn1: contactin 1                                                                                    | NM_007727 | 489.18 | 4550.05 | 9.3   |
| Cdh11: Cadherin 11                                                                                    | AV300631  | 39.57  | 368.01  | 9.3   |
| 6330436F06Rik: RIKEN cDNA 6330436F06 gene                                                             | AK018204  | 77.44  | 714.65  | 9.23  |
| 2310068J10Rik: RIKEN cDNA 2310068J10 gene                                                             | AV092324  | 44.2   | 407.74  | 9.22  |
| Csmd1: CUB and Sushi multiple domains 1                                                               | BB087975  | 48.59  | 446.77  | 9.19  |
| Sh3bp4: SH3-domain binding protein 4                                                                  | NM_133816 | 141.63 | 1300.72 | 9.18  |
| Transcribed locus                                                                                     | BM942899  | 45.07  | 413.57  | 9.18  |
| Enpp6: ectonucleotide pyrophosphatase/phosphodiesterase 6                                             | BB129371  | 65.41  | 597.33  | 9.13  |
| Ncam2: neural cell adhesion molecule 2                                                                | AF001286  | 49.78  | 453.03  | 9.1   |
| 4933439C20Rik: RIKEN cDNA 4933439C20 gene                                                             | AK007420  | 30.43  | 275.73  | 9.06  |
| Prdx6: peroxiredoxin 6                                                                                | AW319648  | 44.2   | 400.1   | 9.05  |
| Slc39a12: solute carrier family 39 (zinc transporter), member 12                                      | AW046938  | 53.13  | 480.47  | 9.04  |
| Ephx2: epoxide hydrolase 2, cytoplasmic                                                               | NM_007940 | 42.37  | 382.59  | 9.03  |
| 4833424O15Rik: RIKEN cDNA 4833424O15 gene                                                             | BB264078  | 48.84  | 440.97  | 9.03  |
| Lrrc4: leucine rich repeat containing 4                                                               | NM_138682 | 166.41 | 1500.49 | 9.02  |
| Abca1: ATP-binding cassette, sub-family A (ABC1), member 1                                            | BB144704  | 179.67 | 1616.36 | 9     |
| Trip11: Thyroid hormone receptor interactor 11                                                        | BB306866  | 18.42  | 165.23  | 8.97  |
| Slc24a3: solute carrier family 24 (sodium/potassium/calcium exchanger), member 3                      | BC017615  | 167.55 | 1497.76 | 8.94  |
| Tubb4: tubulin, beta 4                                                                                | AK013717  | 360.52 | 3183.94 | 8.83  |
| Abca1: ATP-binding cassette, sub-family A (ABC1), member 1                                            | BB144704  | 100.61 | 881.15  | 8.76  |
| Zdhhc14: zinc finger, DHHC domain containing 14                                                       | AV223474  | 143.97 | 1257.11 | 8.73  |
| Ttyh1: tweety homolog 1 (Drosophila)                                                                  | NM_021324 | 19.81  | 170.65  | 8.61  |
| Mm.33784.1                                                                                            | AI854107  | 107.92 | 925.74  | 8.58  |
| 2900078E11Rik: RIKEN cDNA 2900078E11 gene                                                             | AK013801  | 173.91 | 1489.83 | 8.57  |
| Mgll: monoglyceride lipase                                                                            | NM_011844 | 261.51 | 2236.32 | 8.55  |
| Mgll: monoglyceride lipase                                                                            | BI411560  | 244.39 | 2079.57 | 8.51  |
| Col9a1: procollagen, type IX, alpha 1                                                                 | AK004383  | 124.92 | 1061.6  | 8.5   |
| 3110035E14Rik: RIKEN cDNA 3110035E14 gene                                                             | BB348639  | 528.37 | 4482.21 | 8.48  |
| Rasgef1b: RasGEF domain family, member 1B                                                             | BB003229  | 130.88 | 1105.24 | 8.44  |
| D330040H18Rik: RIKEN cDNA D330040H18 gene                                                             | BB532898  | 17.68  | 148.94  | 8.43  |
| Dscaml1: Down syndrome cell adhesion molecule-like 1                                                  | BB239540  | 179.15 | 1507.59 | 8.42  |
| Tmem40: transmembrane protein 40                                                                      | BC019416  | 16.74  | 140.56  | 8.4   |
| Slc30a10: solute carrier family 30, member 10                                                         | BB736474  | 36.2   | 302.81  | 8.37  |
| Unc5c: unc-5 homolog C (C. elegans)                                                                   | NM_009472 | 28.04  | 233.53  | 8.33  |
| Zdhhc14: zinc finger, DHHC domain containing 14                                                       | BB318221  | 175.71 | 1457.01 | 8.29  |
| Sirt2: sirtuin 2 (silent mating type information regulation 2, homolog) 2 (S. cerevisiae)             | BB807595  | 689.07 | 5708.44 | 8.28  |
| Niban: niban protein                                                                                  | AW554191  | 48.23  | 399     | 8.27  |
| Gbp2: guanylate nucleotide binding protein 2                                                          | NM_010260 | 42.26  | 349.16  | 8.26  |
| Gmp2: epithelial membrane protein 2                                                                   | AF083876  | 128.12 | 1056.48 | 8.25  |
| Phyh1 /// Lrrc8a: phytyl-CoA dioxygenase domain containing 1 /// leucine rich repeat containin        | AK005293  | 86.59  | 712.42  | 8.23  |
| Sez6l: seizure related 6 homolog like                                                                 | AF220355  | 80.85  | 664.51  | 8.22  |
| A830091E24: hypothetical A830091E24                                                                   | BB275118  | 22.86  | 187.73  | 8.21  |
| Chi3l1: chitinase 3-like 1                                                                            | BC005611  | 20.71  | 168.29  | 8.12  |
| Zdhhc14: zinc finger, DHHC domain containing 14                                                       | AV361868  | 151.95 | 1230.72 | 8.1   |
| Ar14a: ADP-ribosylation factor-like 4A                                                                | AV328143  | 312.27 | 2508.64 | 8.03  |
| Transcribed locus                                                                                     | BB083283  | 27.58  | 221.63  | 8.03  |
| D630040I23Rik: RIKEN cDNA D630040I23 gene                                                             | BQ173985  | 25.9   | 207.35  | 8.01  |
| Nebi: nebulin                                                                                         | BC025863  | 49.36  | 395.11  | 8     |
| Mgll: monoglyceride lipase                                                                            | AK006949  | 122.72 | 980.93  | 7.99  |
| Tox: thymocyte selection-associated HMG box gene                                                      | BF020502  | 78.13  | 623.12  | 7.98  |
| Transcribed locus                                                                                     | BB357557  | 267.16 | 2130.42 | 7.97  |
| 2610035D17Rik: RIKEN cDNA 2610035D17 gene                                                             | AW494074  | 37.28  | 296.77  | 7.96  |
| Mm.23156.2                                                                                            | BG064671  | 49.67  | 394.89  | 7.95  |
| 1200015N20Rik: RIKEN cDNA 1200015N20 gene                                                             | BB709285  | 75.67  | 601.97  | 7.95  |
| Rgnef: Rho-guanine nucleotide exchange factor                                                         | BG069493  | 18.56  | 145.52  | 7.84  |
| Mm.41361.1                                                                                            | AW490636  | 37.16  | 290.49  | 7.82  |
| E130309F12Rik: RIKEN cDNA E130309F12 gene                                                             | BB546288  | 35.88  | 280.34  | 7.81  |
| E130309F12Rik: RIKEN cDNA E130309F12 gene                                                             | BB523550  | 281.36 | 2177.72 | 7.74  |
| Sh3gl3: SH3-domain GRB2-like 3                                                                        | AK012114  | 397.05 | 3068.85 | 7.73  |
| 9530059O14Rik: RIKEN cDNA 9530059O14 gene                                                             | AW494454  | 35.36  | 273.32  | 7.73  |
| C230093N12Rik: RIKEN cDNA C230093N12 gene                                                             | BC023470  | 34.16  | 263.45  | 7.71  |
| D930023J12Rik: RIKEN cDNA D930023J12 gene                                                             | BQ175029  | 291.76 | 2249.13 | 7.71  |
| C4b /// LOC675521: complement component 4B (Childo blood group) /// similar to Complement C4          | NM_009780 | 110.89 | 853.57  | 7.7   |
| 9530059O14Rik: RIKEN cDNA 9530059O14 gene                                                             | BB371633  | 47.13  | 362.76  | 7.7   |
| Gsn: gelsolin                                                                                         | NM_010354 | 221.48 | 1697.9  | 7.67  |
| Dnm3: dynamin 3                                                                                       | BE988832  | 136.41 | 1045.39 | 7.66  |
| Lum: lumican                                                                                          | AK014312  | 21.71  | 164.64  | 7.59  |
| Luzp2: leucine zipper protein 2                                                                       | BB386209  | 86.93  | 659.67  | 7.59  |

|                                                                                                      |           |        |         |      |
|------------------------------------------------------------------------------------------------------|-----------|--------|---------|------|
| Epb4.1l2: erythrocyte protein band 4.1-like 2                                                        | BB254042  | 163.21 | 1238.28 | 7.59 |
| Papss2: 3'-phosphoadenosine 5'-phosphosulfate synthase 2                                             | BF786072  | 26.49  | 200.84  | 7.58 |
| Kcna6: potassium voltage-gated channel, shaker-related, subfamily, member 6                          | BM119753  | 77.63  | 587.59  | 7.57 |
| Dpysl4: dihydropyrimidinase-like 4                                                                   | NM_011993 | 22.31  | 167     | 7.49 |
| Mm.29322.1                                                                                           | BF462492  | 76.36  | 572.24  | 7.49 |
| Cidea: cell death-inducing DNA fragmentation factor, alpha subunit-like effector A                   | NM_007702 | 18.36  | 136.67  | 7.44 |
| Npa13: NIPA-like domain containing 3                                                                 | BB667103  | 34.12  | 253.37  | 7.43 |
| Slc22a4: solute carrier family 22 (organic cation transporter), member 4                             | BC010590  | 22.27  | 165.26  | 7.42 |
| 5730492I20Rik: RIKEN cDNA 5730492I20 gene                                                            | AV301270  | 25.6   | 189.93  | 7.42 |
| 6430550H21Rik: RIKEN cDNA 6430550H21 gene                                                            | BB520013  | 28.78  | 213.15  | 7.41 |
| 2610034M16Rik: RIKEN cDNA 2610034M16 gene                                                            | BC024774  | 21.97  | 162.56  | 7.4  |
| Fbxo2: F-box protein 2                                                                               | BB311718  | 323.44 | 2384.33 | 7.37 |
| Cyfp2: cytoplasmic FMR1 interacting protein 2                                                        | AK005148  | 424.55 | 3118.49 | 7.35 |
| 4833424O15Rik: RIKEN cDNA 4833424O15 gene                                                            | BB346520  | 53.33  | 389.54  | 7.3  |
| Gsn: gelsolin                                                                                        | AV025667  | 220.32 | 1602.63 | 7.27 |
| E130309F12Rik: RIKEN cDNA E130309F12 gene                                                            | BB523550  | 212.21 | 1540.28 | 7.26 |
| Edg2: endothelial differentiation, lysophosphatidic acid G-protein-coupled receptor, 2               | U70622    | 72.02  | 520.81  | 7.23 |
| Phkg1: phosphorylase kinase gamma 1                                                                  | NM_011079 | 24.81  | 179.04  | 7.22 |
| Edg2: endothelial differentiation, lysophosphatidic acid G-protein-coupled receptor, 2               | U70622    | 63.75  | 455.23  | 7.14 |
| Amotl2: angiomin like 2                                                                              | A1156725  | 207.51 | 1478.86 | 7.13 |
| Cldn10: claudin 10                                                                                   | BC021770  | 51.27  | 363.13  | 7.08 |
| Mm.220239.1                                                                                          | BB318787  | 44     | 311.07  | 7.07 |
| Arrec3: Arrestin domain containing 3                                                                 | AW556597  | 36.99  | 261.4   | 7.07 |
| Elavl3: ELAV (embryonic lethal, abnormal vision, Drosophila)-like 3 (Hu antigen C)                   | U29149    | 59.99  | 421.92  | 7.03 |
| Slc2a4: solute carrier family 2 (facilitated glucose transporter), member 4                          | AB008453  | 20.74  | 145.13  | 7    |
| Mtap2: Microtubule-associated protein 2                                                              | BB386302  | 41.05  | 286.27  | 6.97 |
| S100a3: S100 calcium binding protein A3                                                              | AF087470  | 21.06  | 146.67  | 6.96 |
| Rnd2: Rho family GTPase 2                                                                            | NM_009708 | 591.29 | 4114.48 | 6.96 |
| Bcas1: breast carcinoma amplified sequence 1                                                         | AK020254  | 21.36  | 148.56  | 6.96 |
| 6430550H21Rik: RIKEN cDNA 6430550H21 gene                                                            | BB093996  | 18.16  | 125.48  | 6.91 |
| Mitf: microphthalmia-associated transcription factor                                                 | BB763517  | 81.26  | 559.03  | 6.88 |
| Ttyh1 /// Taf1: tweety homolog 1 (Drosophila) /// TAF1 RNA polymerase II, TATA box binding protein   | NM_021324 | 749.46 | 5151.76 | 6.87 |
| St18: suppression of tumorigenicity 18                                                               | BB178719  | 36.25  | 248.73  | 6.86 |
| B130050I23Rik: RIKEN cDNA B130050I23 gene                                                            | AK009699  | 30.5   | 208.63  | 6.84 |
| 1190005I06Rik: RIKEN cDNA 1190005I06 gene                                                            | B1133691  | 152.69 | 1036.06 | 6.79 |
| Lsmp: Limbic system-associated membrane protein                                                      | BB082567  | 156.84 | 1064.49 | 6.79 |
| Transcribed locus                                                                                    | BB392681  | 48.76  | 329.77  | 6.76 |
| 2900005I04Rik: RIKEN cDNA 2900005I04 gene                                                            | AK013482  | 29.39  | 198.31  | 6.75 |
| Ugt1a2 /// Ugt1a6a /// Ugt1a10 /// Ugt1a7c /// Ugt1a5 /// Ugt1a9 /// Ugt1a6b /// Ugt1a1: UDP glu     | D87867    | 33.14  | 223.37  | 6.74 |
| Anks1b /// LOC544718: ankyrin repeat and sterile alpha motif domain containing 1B /// similar to A1  | AW046296  | 74.79  | 502.68  | 6.72 |
| Sh3bp4: SH3-domain binding protein 4                                                                 | BB130014  | 98.23  | 659.72  | 6.72 |
| Opcm1: opioid binding protein/cell adhesion molecule-like                                            | AV328011  | 120.44 | 803.17  | 6.67 |
| Tmem108: transmembrane protein 108                                                                   | BB733119  | 60.73  | 404.64  | 6.66 |
| Frpm1 /// LOC669360 /// LOC674439: FERM and PDZ domain containing 1 /// similar to FERM and          | BM213356  | 49.65  | 329.14  | 6.63 |
| Susd4: sushi domain containing 4                                                                     | BC021842  | 52.27  | 346.04  | 6.62 |
| Lrrc4c: leucine rich repeat containing 4C                                                            | AV336083  | 109.21 | 721.22  | 6.6  |
| Rgnef: Rho-guanine nucleotide exchange factor                                                        | BG069493  | 39.07  | 256.95  | 6.58 |
| Ust: uronyl-2-sulfotransferase                                                                       | BB561487  | 43.54  | 286.01  | 6.57 |
| Cobll1: Cobl-like 1                                                                                  | BB521302  | 21.26  | 139.52  | 6.56 |
| Gm967: gene model 967, (NCBI)                                                                        | BE647179  | 88.11  | 576.82  | 6.55 |
| Dpp10: Dipeptidylpeptidase 10                                                                        | BB393194  | 24.07  | 156.7   | 6.51 |
| Gsn: gelsolin                                                                                        | AV025559  | 196.52 | 1277.77 | 6.5  |
| Unc5c: unc-5 homolog C (C. elegans)                                                                  | NM_009472 | 60.3   | 391.84  | 6.5  |
| Tgfa: transforming growth factor alpha                                                               | M92420    | 187.06 | 1213.98 | 6.49 |
| 9630020C08Rik /// LOC676640: RIKEN cDNA 9630020C08 gene /// region containing RIKEN cDNA 9           | BB639193  | 21.43  | 138.97  | 6.48 |
| Opcm1: opioid binding protein/cell adhesion molecule-like                                            | BB383296  | 157.69 | 1019.58 | 6.47 |
| Clu: clusterin                                                                                       | BB433678  | 707.04 | 4560.56 | 6.45 |
| Atcay: ataxia, cerebellar, Cayman type homolog (human)                                               | BQ042885  | 46.44  | 299.57  | 6.45 |
| Mm.39467.1                                                                                           | BQ175377  | 357.11 | 2293.45 | 6.42 |
| Capn5: calpain 5                                                                                     | BC014767  | 26.21  | 167.53  | 6.39 |
| Gsn: gelsolin                                                                                        | AV224521  | 213.83 | 1366.28 | 6.39 |
| Lgi3: leucine-rich repeat LGI family, member 3                                                       | A1841179  | 30.36  | 193.78  | 6.38 |
| Ugt1a2 /// Ugt1a6a /// Ugt1a10 /// Ugt1a7c /// Ugt1a5 /// Ugt1a9 /// Ugt1a6b /// Ugt1a1: UDP glu     | BC019434  | 72.89  | 462.9   | 6.35 |
| 2810468N07Rik: RIKEN cDNA 2810468N07 gene                                                            | AK013390  | 266.79 | 1695.42 | 6.35 |
| Galnt10: UDP-N-acetyl-alpha-D-galactosamine:polypeptide N-acetylgalactosaminyltransferase 10         | BG965198  | 128.3  | 813.94  | 6.34 |
| A330076H08Rik: RIKEN cDNA A330076H08 gene                                                            | BB130348  | 60.37  | 381.41  | 6.32 |
| Clu: clusterin                                                                                       | NM_013492 | 441.17 | 2783.84 | 6.31 |
| Kcnq1: Potassium voltage-gated channel, subfamily Q, member 1                                        | BB233597  | 20.39  | 128.68  | 6.31 |
| Nrbp2: nuclear receptor binding protein 2                                                            | BC012437  | 152.47 | 958.2   | 6.28 |
| Epb4.1l3: erythrocyte protein band 4.1-like 3                                                        | BB036542  | 22.33  | 139.75  | 6.26 |
| Ppp2r2b: protein phosphatase 2 (formerly 2A), regulatory subunit B (PR 52), beta isoform             | BB560759  | 444.5  | 2776.16 | 6.25 |
| Ntr2: neurotensin receptor 2                                                                         | NM_008747 | 414.67 | 2583.15 | 6.23 |
| A230057G18Rik: RIKEN cDNA A230057G18 gene                                                            | AV221928  | 250.19 | 1558.29 | 6.23 |
| Myl1: myelin transcription factor 1                                                                  | NM_008665 | 166.59 | 1034.88 | 6.21 |
| Nova1 /// LOC664883: neuro-oncological ventral antigen 1 /// similar to neuro-oncological ventral an | BB627486  | 99.18  | 616.17  | 6.21 |
| Mm.62358.1                                                                                           | BE691662  | 98.5   | 612.14  | 6.21 |
| Plec1: plectin 1                                                                                     | AW123286  | 179.08 | 1108.54 | 6.19 |
| Megf11: multiple EGF-like-domains 11                                                                 | BB360213  | 94.22  | 583.33  | 6.19 |
| Niban: niban protein                                                                                 | NM_022018 | 25.08  | 154.86  | 6.18 |
| Pld2: phospholipase D2                                                                               | BB118582  | 132.19 | 816.9   | 6.18 |
| Mm.26134.1                                                                                           | BG069308  | 29.05  | 178.65  | 6.15 |
| Pleckh1: pleckstrin homology domain containing, family B (evectins) member 1                         | NM_013746 | 660.18 | 4027.53 | 6.1  |
| Csmd3: CUB and Sushi multiple domains 3                                                              | AV327842  | 31.83  | 194.12  | 6.1  |
| Cnp1: cyclic nucleotide phosphodiesterase 1                                                          | M58045    | 609.72 | 3702.14 | 6.07 |
| Gje1: gap junction membrane channel protein epsilon 1                                                | NM_080450 | 34.08  | 206     | 6.04 |
| 9330159K06: hypothetical protein 9330159K06                                                          | BB079787  | 27.7   | 167.17  | 6.04 |
| BC017647: cDNA sequence BC017647                                                                     | BB389461  | 38.59  | 232.99  | 6.04 |
| Dgkb: diacylglycerol kinase, beta                                                                    | AW493391  | 98.22  | 587.99  | 5.99 |
| Mycl1: v-myc myelocytomatosis viral oncogene homolog 1, lung carcinoma derived (avian)               | BG064871  | 107.09 | 639.84  | 5.97 |

|                                                                                                   |           |         |         |      |
|---------------------------------------------------------------------------------------------------|-----------|---------|---------|------|
| 1700054019Rik: RIKEN cDNA 1700054019 gene                                                         | AK006789  | 20.83   | 123.99  | 5.95 |
| Ctnna2: Catenin (cadherin associated protein), alpha 2                                            | BB040120  | 115.14  | 683.92  | 5.94 |
| 2700045P11Rik: RIKEN cDNA 2700045P11 gene                                                         | BB426857  | 54      | 320.27  | 5.93 |
| Aatk: apoptosis-associated tyrosine kinase                                                        | NM_007377 | 85.66   | 505.27  | 5.9  |
| Clu: clusterin                                                                                    | AV152288  | 862.72  | 5093.35 | 5.9  |
| Gja1: gap junction membrane channel protein alpha 1                                               | M63801    | 870.99  | 5131.42 | 5.89 |
| Plscr4: phospholipid scramblase 4                                                                 | BB826296  | 44.14   | 259.88  | 5.89 |
| 6330417K15Rik: RIKEN cDNA 6330417K15 gene                                                         | AI847460  | 27.74   | 162.84  | 5.87 |
| Lrrtm3: leucine rich repeat transmembrane neuronal 3                                              | BM224801  | 33.79   | 198.02  | 5.86 |
| Sh3d19: SH3 domain protein D19                                                                    | BF232848  | 30.44   | 178.15  | 5.85 |
| Alcam: activated leukocyte cell adhesion molecule                                                 | BB534113  | 40.77   | 237.79  | 5.83 |
| Phca: phytoceramidase, alkaline                                                                   | BE573407  | 26.35   | 153.16  | 5.81 |
| Rab33a: RAB33A, member of RAS oncogene family                                                     | NM_011228 | 475.14  | 2751.8  | 5.79 |
| Gabbr1: gamma-aminobutyric acid (GABA-B) receptor, 1                                              | NM_019439 | 179.05  | 1036.76 | 5.79 |
| Heph: hephaestin                                                                                  | NM_010417 | 24.45   | 140.64  | 5.75 |
| Cyp46a1: cytochrome P450, family 46, subfamily a, polypeptide 1                                   | NM_010010 | 88.19   | 506.17  | 5.74 |
| 2310043N10Rik: RIKEN cDNA 2310043N10 gene                                                         | AK018202  | 179.97  | 1033.79 | 5.74 |
| Adult male hippocampus cDNA, RIKEN full-length enriched library, clone:C630007G15 product:hypot   | BE854242  | 29.42   | 168.78  | 5.74 |
| Meig1: meiosis expressed gene 1                                                                   | BF021951  | 30.46   | 174.33  | 5.72 |
| Frmf5: FERM domain containing 5                                                                   | AW046024  | 134.38  | 768.49  | 5.72 |
| Clu: clusterin                                                                                    | AV075715  | 919.95  | 5258.24 | 5.72 |
| Synpo2: synaptopodin 2                                                                            | AI848603  | 30.68   | 175.53  | 5.72 |
| Ugt1a2 /// Ugt1a6a /// Ugt1a10 /// Ugt1a7c /// Ugt1a5 /// Ugt1a9 /// Ugt1a6b /// Ugt1a1: UDP glu  | D87867    | 130.38  | 744.68  | 5.71 |
| Alcam: activated leukocyte cell adhesion molecule                                                 | U95030    | 172.93  | 988.25  | 5.71 |
| D15Ert30e: DNA segment, Chr 15, ERATO Doi 30, expressed                                           | BG065715  | 45.64   | 259.76  | 5.69 |
| LOC626832 /// LOC628147 /// LOC668030 /// LOC668066: similar to gonadotropin inducible ovariar    | BM899333  | 115.32  | 655.2   | 5.68 |
| Lcorl: ligand dependent nuclear receptor corepressor-like                                         | BE650208  | 339.05  | 1924.13 | 5.68 |
| 12 days embryo head cDNA, RIKEN full-length enriched library, clone:300003N14 product:hypothet    | BB223643  | 88.19   | 499.46  | 5.66 |
| 2900075N08Rik: RIKEN cDNA 2900075N08 gene                                                         | AV345687  | 109.83  | 616.45  | 5.61 |
| Dusp26: dual specificity phosphatase 26 (putative)                                                | BC018204  | 111.38  | 622.07  | 5.59 |
| Paqr7: Progesterin and adipoQ receptor family member VII                                          | AV290119  | 70.32   | 391.49  | 5.57 |
| Pdgfra: platelet derived growth factor, alpha                                                     | BB371842  | 156.88  | 872.71  | 5.56 |
| Lrrc4c: leucine rich repeat containing 4C                                                         | BB351752  | 34.55   | 191.96  | 5.56 |
| Scn8a: sodium channel, voltage-gated, type VIII, alpha                                            | AV221826  | 27.72   | 154.05  | 5.56 |
| Hist3h2ba: histone cluster 3, H2ba                                                                | NM_030082 | 330.86  | 1833.98 | 5.54 |
| Hbp1: high mobility group box transcription factor 1                                              | BB399042  | 29.16   | 161.48  | 5.54 |
| Map6d1: MAP6 domain containing 1                                                                  | BB762333  | 78.36   | 432.4   | 5.52 |
| Sdk1: sidekick homolog 1 (chicken)                                                                | BB106803  | 22.82   | 125.95  | 5.52 |
| Mm.69577.1                                                                                        | BB609762  | 43.95   | 242.39  | 5.52 |
| Ndrp2: N-myc downstream regulated gene 2                                                          | NM_013864 | 848.01  | 4675.85 | 5.51 |
| Tox: thymocyte selection-associated HMG box gene                                                  | BB547854  | 100.69  | 553.3   | 5.5  |
| Atcay: ataxia, cerebellar, Cayman type homolog (human)                                            | BQ042885  | 79.62   | 437.68  | 5.5  |
| Alcam: activated leukocyte cell adhesion molecule                                                 | AV315205  | 218     | 1196.38 | 5.49 |
| Kcnb1: potassium voltage gated channel, Shab-related subfamily, member 1                          | BB324482  | 41.18   | 225.01  | 5.46 |
| Ptpro: protein tyrosine phosphatase, receptor type, O                                             | AF295638  | 102.9   | 561.35  | 5.46 |
| BC019943: cDNA sequence BC019943                                                                  | AV030795  | 23.62   | 128.72  | 5.45 |
| Ets1: E26 avian leukemia oncogene 1, 5' domain                                                    | BB151715  | 116.69  | 634.4   | 5.44 |
| 5430431D22Rik: RIKEN cDNA 5430431D22 gene                                                         | AK017369  | 22.76   | 123.67  | 5.43 |
| Tox: thymocyte selection-associated HMG box gene                                                  | BB547854  | 72.3    | 390.74  | 5.4  |
| Pcdh7: protocadherin 7                                                                            | BB197591  | 184.7   | 997.18  | 5.4  |
| Transcribed locus                                                                                 | BE648105  | 25.05   | 135.36  | 5.4  |
| 1700019G17Rik: RIKEN cDNA 1700019G17 gene                                                         | BM214338  | 56.68   | 305.37  | 5.39 |
| Nav3: Neuron navigator 3                                                                          | BB667304  | 77.75   | 419.37  | 5.39 |
| Bub1b: budding uninhibited by benzimidazoles 1 homolog, beta (S. cerevisiae)                      | AU045529  | 33.79   | 181.99  | 5.39 |
| Entpd2: ectonucleoside triphosphate diphosphohydrolase 2                                          | NM_009849 | 144.64  | 778.53  | 5.38 |
| Dscaml1: Down syndrome cell adhesion molecule-like 1                                              | AF351196  | 49.93   | 268.79  | 5.38 |
| Apoe: apolipoprotein E                                                                            | AK019319  | 1863.51 | 9912.33 | 5.32 |
| Gbp2: guanylate nucleotide binding protein 2                                                      | BE197524  | 61.02   | 323.91  | 5.31 |
| Dmrtb1: DMRT-like family B with proline-rich C-terminal, 1                                        | BB726544  | 113.48  | 601.12  | 5.3  |
| Tspan4: tetraspanin 4                                                                             | NM_053082 | 186.15  | 985.49  | 5.29 |
| 16 days neonate cerebellum cDNA, RIKEN full-length enriched library, clone:9630048A22 product:ur  | BE953888  | 65.55   | 347.02  | 5.29 |
| Rnf144: Ring finger protein 144                                                                   | BB446263  | 54.96   | 290     | 5.28 |
| Zdhhc14: zinc finger, DHHC domain containing 14                                                   | BC021423  | 83.54   | 439.99  | 5.27 |
| Nkx2-2: NK2 transcription factor related, locus 2 (Drosophila)                                    | NM_010919 | 261.18  | 1372.81 | 5.26 |
| Epha5: Eph receptor A5                                                                            | BE951744  | 117.29  | 616.58  | 5.26 |
| Sh3d19: SH3 domain protein D19                                                                    | BG072274  | 61.12   | 319.19  | 5.22 |
| Bcas1: breast carcinoma amplified sequence 1                                                      | AK020254  | 34.74   | 181.37  | 5.22 |
| A130038J17Rik: RIKEN cDNA A130038J17 gene                                                         | BB216233  | 37.33   | 194.43  | 5.21 |
| Ptpro: protein tyrosine phosphatase, receptor type, O                                             | NM_011216 | 253.79  | 1314.07 | 5.18 |
| Timp3: tissue inhibitor of metalloproteinase 3                                                    | BI111620  | 149.83  | 775.94  | 5.18 |
| Gm114: gene model 114, (NCBI)                                                                     | BB667214  | 354.01  | 1824.48 | 5.15 |
| Unc5c: Unc-5 homolog C (C. elegans)                                                               | AI644595  | 31.33   | 160.49  | 5.12 |
| Alcam: activated leukocyte cell adhesion molecule                                                 | U95030    | 156.99  | 799.65  | 5.09 |
| Ets1: E26 avian leukemia oncogene 1, 5' domain                                                    | BB151715  | 131.21  | 668.14  | 5.09 |
| 1200015N20Rik: RIKEN cDNA 1200015N20 gene                                                         | NM_024244 | 383.77  | 1948.92 | 5.08 |
| 1200015N20Rik: RIKEN cDNA 1200015N20 gene                                                         | BB189202  | 28.68   | 145.43  | 5.07 |
| 5330421F07Rik: RIKEN cDNA 5330421F07 gene                                                         | BB093903  | 148.84  | 752.43  | 5.06 |
| Mm.19027.2                                                                                        | AI447812  | 105.12  | 530.7   | 5.05 |
| Abhd7: abhydrolase domain containing 7                                                            | BB175669  | 62.59   | 315.45  | 5.04 |
| Prkcb1: Protein kinase C, beta 1                                                                  | BB160675  | 27.66   | 139.37  | 5.04 |
| Kctd4: potassium channel tetramerisation domain containing 4                                      | NM_026214 | 143.39  | 718.85  | 5.01 |
| Hes5: hairy and enhancer of split 5 (Drosophila)                                                  | BB561515  | 663.29  | 3323.74 | 5.01 |
| 2410025L10Rik: RIKEN cDNA 2410025L10 gene                                                         | AV330483  | 221.93  | 1108.49 | 4.99 |
| Rasgef1a: RasGEF domain family, member 1A                                                         | BI134758  | 30.14   | 150.51  | 4.99 |
| Ust: uroonyl-2-sulfotransferase                                                                   | BB794320  | 303.47  | 1513.48 | 4.99 |
| Chn2: chimerin (chimaerin) 2                                                                      | AK006398  | 452.27  | 2254.04 | 4.98 |
| Adult male corpus striatum cDNA, RIKEN full-length enriched library, clone:C030004I10 product:unc | BB355134  | 35.75   | 177.86  | 4.97 |
| Spag1: sperm associated antigen 1                                                                 | NM_012031 | 86.63   | 429.88  | 4.96 |
| Gdpd2: glycerophosphodiester phosphodiesterase domain containing 2                                | BB550907  | 151.25  | 749.29  | 4.95 |

|                                                                                                       |           |         |         |      |
|-------------------------------------------------------------------------------------------------------|-----------|---------|---------|------|
| Pdhb /// LOC620009: pyruvate dehydrogenase (lipoamide) beta /// similar to pyruvate dehydrogenase     | AK011810  | 43.84   | 217.08  | 4.95 |
| Cnp1: cyclic nucleotide phosphodiesterase 1                                                           | M58045    | 838.3   | 4153.73 | 4.95 |
| Nebi: nebulin                                                                                         | BM121794  | 308.34  | 1526.86 | 4.95 |
| Ttyh1: tweety homolog 1 (Drosophila)                                                                  | BB560071  | 456.71  | 2255.27 | 4.94 |
| Mm.25535.1                                                                                            | BG067986  | 149.67  | 738.08  | 4.93 |
| Ttyh1: tweety homolog 1 (Drosophila)                                                                  | NM_021324 | 749.72  | 3686.94 | 4.92 |
| Cdh11: cadherin 11                                                                                    | NM_009866 | 345.33  | 1696.48 | 4.91 |
| Edg2: endothelial differentiation, lysophosphatidic acid G-protein-coupled receptor, 2                | U48235    | 41.93   | 205.62  | 4.9  |
| Transcribed locus                                                                                     | AV238942  | 50.29   | 246.52  | 4.9  |
| Plp: plasma membrane proteolipid                                                                      | BC024534  | 166.02  | 810.82  | 4.88 |
| Adcy8: adenylate cyclase 8                                                                            | NM_009623 | 36.17   | 176.31  | 4.87 |
| Mrg1: Myeloid ecotropic viral integration site-related gene 1                                         | BM205065  | 41.54   | 202.2   | 4.87 |
| Cntn3: contactin 3                                                                                    | BB559510  | 35.35   | 171.94  | 4.86 |
| Mm.194625.1                                                                                           | A1836671  | 59.66   | 289.09  | 4.85 |
| Pdgfra: platelet derived growth factor, alpha                                                         | BB371842  | 245     | 1186.77 | 4.84 |
| Nfasc: neurofascin                                                                                    | BB409198  | 87.72   | 423.87  | 4.83 |
| Emp2: epithelial membrane protein 2                                                                   | AF083876  | 217.24  | 1046.22 | 4.82 |
| Transcribed locus                                                                                     | AW120584  | 32.4    | 156.12  | 4.82 |
| Alcam: activated leukocyte cell adhesion molecule                                                     | AV315205  | 202.39  | 974.18  | 4.81 |
| Serinc3: serine incorporator 3                                                                        | BM239368  | 601.94  | 2888.89 | 4.8  |
| Hes5: hairy and enhancer of split 5 (Drosophila)                                                      | AV337579  | 217.15  | 1039.1  | 4.79 |
| Cpeb3: cytoplasmic polyadenylation element binding protein 3                                          | BB770826  | 49.43   | 236.85  | 4.79 |
| Itp2: Inositol 1,4,5-triphosphate receptor 2                                                          | BM225081  | 26.84   | 128.54  | 4.79 |
| Fzd8: frizzled homolog 8 (Drosophila)                                                                 | BB086994  | 40.74   | 194.99  | 4.79 |
| Gabbr1: gamma-aminobutyric acid (GABA-B) receptor, 1                                                  | BE688087  | 461.34  | 2204.67 | 4.78 |
| Trio: triple functional domain (PTPRF interacting)                                                    | BE958518  | 60.5    | 289.25  | 4.78 |
| 4930570G19Rik: RIKEN cDNA 4930570G19 gene                                                             | BB428007  | 29.86   | 142.9   | 4.78 |
| Ankrd15: ankyrin repeat domain 15                                                                     | BQ032773  | 200.89  | 958.02  | 4.77 |
| 6720401G13Rik: RIKEN cDNA 6720401G13 gene                                                             | A1452037  | 55.33   | 263.55  | 4.76 |
| 2900075N08Rik: RIKEN cDNA 2900075N08 gene                                                             | BM948078  | 70.8    | 337.32  | 4.76 |
| Frmf5: FERM domain containing 5                                                                       | BB277380  | 59.27   | 281.3   | 4.75 |
| Pink1: PTEN induced putative kinase 1                                                                 | AV371921  | 432.77  | 2055.48 | 4.75 |
| Mark1: MAP/microtubule affinity-regulating kinase 1                                                   | BM213279  | 137.47  | 651.72  | 4.74 |
| Transcribed locus                                                                                     | BM246522  | 114.28  | 541.14  | 4.74 |
| Pcdh10: protocadherin 10                                                                              | BB313974  | 69      | 326.37  | 4.73 |
| Pcdh10: protocadherin 10                                                                              | NM_011043 | 216.39  | 1020.99 | 4.72 |
| Ptgs2: prostaglandin-endoperoxide synthase 2                                                          | M94967    | 46.77   | 220.21  | 4.71 |
| Ras10b: RAS-like, family 10, member B                                                                 | BB381618  | 75.31   | 354.42  | 4.71 |
| Pcdhb16: protocadherin beta 16                                                                        | BB131219  | 107.43  | 503.91  | 4.69 |
| Smox: spermine oxidase                                                                                | BB541614  | 33.89   | 158.71  | 4.68 |
| LOC553091: hypothetical LOC553091                                                                     | BG068705  | 121.94  | 570.37  | 4.68 |
| Gja9: gap junction membrane channel protein alpha 9                                                   | BI737842  | 38.82   | 180.31  | 4.65 |
| Sox21: SRY-box containing gene 21                                                                     | AY069926  | 264     | 1223.89 | 4.64 |
| Phyhlpl: Phytanoyl-CoA hydroxylase interacting protein-like                                           | BB313560  | 75.74   | 351.12  | 4.64 |
| Transcribed locus                                                                                     | AV348780  | 42.85   | 198.46  | 4.63 |
| 2900041A09Rik: RIKEN cDNA 2900041A09 gene                                                             | AK013631  | 86.34   | 399.36  | 4.63 |
| Dach2: dachshund 2 (Drosophila)                                                                       | BB175077  | 27.77   | 128.45  | 4.63 |
| Sez6l: seizure related 6 homolog like                                                                 | AW539724  | 31.07   | 143     | 4.6  |
| Abca1: ATP-binding cassette, sub-family A (ABC1), member 1                                            | BB144704  | 1100.01 | 5048.37 | 4.59 |
| Arl4a: ADP-ribosylation factor-like 4A                                                                | AK006286  | 355.83  | 1633.78 | 4.59 |
| Atcay: ataxia, cerebellar, Cayman type homolog (human)                                                | BQ042885  | 57.73   | 264.99  | 4.59 |
| Abtb2: ankyrin repeat and BTB (POZ) domain containing 2                                               | BB621938  | 80.74   | 370.24  | 4.59 |
| Arhgef19: Rho guanine nucleotide exchange factor (GEF) 19                                             | AV321315  | 52.68   | 241.96  | 4.59 |
| Edg3: endothelial differentiation, sphingolipid G-protein-coupled receptor, 3                         | AV238324  | 162.84  | 747.22  | 4.59 |
| Arvcf: armadillo repeat gene deleted in velo-cardio-facial syndrome                                   | BE947943  | 49.42   | 226.53  | 4.58 |
| 1810015C04Rik: RIKEN cDNA 1810015C04 gene                                                             | NM_025459 | 97.71   | 446.46  | 4.57 |
| Transcribed locus                                                                                     | BQ175021  | 67.7    | 309     | 4.56 |
| Plxn1: plexin C1                                                                                      | BB476707  | 33.73   | 153.31  | 4.55 |
| 9430012M22Rik: RIKEN cDNA 9430012M22 gene                                                             | AK020412  | 42.68   | 194.19  | 4.55 |
| Mm.125186.1                                                                                           | BG060627  | 112.5   | 512.1   | 4.55 |
| Id4: Inhibitor of DNA binding 4                                                                       | BB306828  | 324.48  | 1472.05 | 4.54 |
| Psd2: pleckstrin and Sec7 domain containing 2                                                         | AK018116  | 202.43  | 918.36  | 4.54 |
| Tmcc3: transmembrane and coiled coil domains 3                                                        | BB711990  | 254.56  | 1156.23 | 4.54 |
| Rora: RAR-related orphan receptor alpha                                                               | BF464701  | 29.5    | 133.82  | 4.54 |
| Frmf4a: FERM domain containing 4A                                                                     | AV323439  | 36.09   | 163.4   | 4.53 |
| Alcam: Activated leukocyte cell adhesion molecule                                                     | AW547545  | 50.19   | 227.59  | 4.53 |
| Epha5: Eph receptor A5                                                                                | A1854630  | 92.67   | 418.13  | 4.51 |
| Spon1: spondin 1, (f-spondin) extracellular matrix protein                                            | BC020531  | 577.49  | 2598.82 | 4.5  |
| Anks1b /// LOC544718: ankyrin repeat and sterile alpha motif domain containing 1B /// similar to A1   | BQ174247  | 241.6   | 1088.34 | 4.5  |
| Pcdh10: protocadherin 10                                                                              | BB174272  | 112.02  | 503.16  | 4.49 |
| Sorbs1: Sorbin and SH3 domain containing 1                                                            | BB218653  | 191.27  | 858.72  | 4.49 |
| Dock9 /// LOC670309: dedicator of cytokinesis 9 /// similar to Dedicator of cytokinesis protein 9 (Cd | BB795072  | 75.61   | 338.79  | 4.48 |
| Ntrk2: neurotrophic tyrosine kinase, receptor, type 2                                                 | BB795585  | 573.94  | 2570.92 | 4.48 |
| Ehd3: EH-domain containing 3                                                                          | BM234719  | 334.02  | 1484.95 | 4.45 |
| Ctnna2: catenin (cadherin associated protein), alpha 2                                                | NM_009819 | 214.97  | 956.75  | 4.45 |
| Adult male hypothalamus cDNA, RIKEN full-length enriched library, clone:A230096K23 product:39 K       | BB182155  | 36.47   | 161.89  | 4.44 |
| A930041H05Rik: RIKEN cDNA A930041H05 gene                                                             | BB314361  | 30.41   | 135.02  | 4.44 |
| Phca: phytoceramidase, alkaline                                                                       | BE573407  | 58.13   | 257.24  | 4.43 |
| Susd4: sushi domain containing 4                                                                      | BF455403  | 123.43  | 547.36  | 4.43 |
| Col9a1: procollagen, type IX, alpha 1                                                                 | NM_007740 | 58.9    | 260.32  | 4.42 |
| Myo6: myosin VI                                                                                       | BB200233  | 243.41  | 1076.13 | 4.42 |
| Mm.214313.1                                                                                           | BM117114  | 51.81   | 229.06  | 4.42 |
| Tmem108: transmembrane protein 108                                                                    | BB431028  | 45.24   | 198.97  | 4.4  |
| 6330415B21Rik: RIKEN cDNA 6330415B21 gene                                                             | BB261763  | 119.26  | 522.2   | 4.38 |
| Tmcc3: transmembrane and coiled coil domains 3                                                        | BB711990  | 175.21  | 763.47  | 4.36 |
| Anks1b /// LOC544718: ankyrin repeat and sterile alpha motif domain containing 1B /// similar to A1   | BQ174247  | 141.73  | 617.4   | 4.36 |
| Grin3a: glutamate receptor ionotropic, NMDA3A                                                         | AV325957  | 56.31   | 245.3   | 4.36 |
| Pcdh9: Protocadherin 9                                                                                | BE979956  | 83.99   | 364.97  | 4.35 |
| Prkcz: protein kinase C, zeta                                                                         | BB430502  | 47.94   | 208.69  | 4.35 |

|                                                                                                       |           |         |         |      |
|-------------------------------------------------------------------------------------------------------|-----------|---------|---------|------|
| Endod1: endonuclease domain containing 1                                                              | BF168366  | 65.79   | 285.62  | 4.34 |
| Edg1: endothelial differentiation sphingolipid G-protein-coupled receptor 1                           | BB133079  | 247.38  | 1067.59 | 4.32 |
| 6330403K07Rik: RIKEN cDNA 6330403K07 gene                                                             | AK018106  | 1326.19 | 5728.8  | 4.32 |
| Prkg2: protein kinase, cGMP-dependent, type II                                                        | BB823350  | 59.56   | 257.26  | 4.32 |
| 5031425E22Rik: RIKEN cDNA 5031425E22 gene                                                             | AK017143  | 231.65  | 1000.74 | 4.32 |
| Cacng4: calcium channel, voltage-dependent, gamma subunit 4                                           | BB333636  | 133.71  | 576.08  | 4.31 |
| Lrrtm3: leucine rich repeat transmembrane neuronal 3                                                  | BB132359  | 44.95   | 193.2   | 4.3  |
| Pim3: proviral integration site 3                                                                     | BB206220  | 375.38  | 1610.39 | 4.29 |
| Tcf7l2: Transcription factor 7-like 2, T-cell specific, HMG-box                                       | BM218908  | 67.47   | 289.7   | 4.29 |
| Sorbs1: sorbin and SH3 domain containing 1                                                            | BB259710  | 135.77  | 581.15  | 4.28 |
| Usp53: ubiquitin specific peptidase 53                                                                | AV320152  | 47.54   | 203.51  | 4.28 |
| Col3a1: procollagen, type III, alpha 1                                                                | AW550625  | 91.36   | 390.47  | 4.27 |
| Tmcc3: transmembrane and coiled coil domains 3                                                        | BC026867  | 153.11  | 653.84  | 4.27 |
| Pcdh9: Protocadherin 9                                                                                | BM941356  | 76.17   | 325.56  | 4.27 |
| C030019F02Rik: RIKEN cDNA C030019F02 gene                                                             | NM_021426 | 176.28  | 751.04  | 4.26 |
| C230093N12Rik: RIKEN cDNA C230093N12 gene                                                             | BC023470  | 230.79  | 983.18  | 4.26 |
| Efcab2: EF-hand calcium binding domain 2                                                              | BC025062  | 32.19   | 137.1   | 4.26 |
| Transcribed locus                                                                                     | AW125035  | 115.57  | 492.83  | 4.26 |
| Dixdcl1: DIX domain containing 1                                                                      | AW455436  | 40.62   | 173.17  | 4.26 |
| Acaa2: acetyl-Coenzyme A acyltransferase 2 (mitochondrial 3-oxoacyl-Coenzyme A thiolase)              | AK002555  | 211.87  | 900.26  | 4.25 |
| Adra2a: adrenergic receptor, alpha 2a                                                                 | BB262415  | 47.26   | 200.63  | 4.25 |
| Rangap1: RAN GTPase activating protein 1                                                              | BF460623  | 56.1    | 238.58  | 4.25 |
| Kctd5: potassium channel tetramerisation domain containing 5                                          | BF577853  | 514.18  | 2180.94 | 4.24 |
| Tcf7l2: transcription factor 7-like 2, T-cell specific, HMG-box                                       | AF107298  | 90.78   | 384.8   | 4.24 |
| Lphn3: latrophilin 3                                                                                  | BE945410  | 145.81  | 618.3   | 4.24 |
| Calcr1: calcitonin receptor-like                                                                      | AF209905  | 133.44  | 563.8   | 4.23 |
| Ctsf: cathepsin F                                                                                     | AK017474  | 152.84  | 644.67  | 4.22 |
| Stom: stomatin                                                                                        | AF093620  | 123.52  | 520.54  | 4.21 |
| Pcdhb22: protocadherin beta 22                                                                        | AV336932  | 60.77   | 255.94  | 4.21 |
| E130203B14Rik: RIKEN cDNA E130203B14 gene                                                             | BB304844  | 32.95   | 138.76  | 4.21 |
| 2310035P21Rik: RIKEN cDNA 2310035P21 gene                                                             | BG230003  | 89.8    | 376.74  | 4.2  |
| Pla2g7: phospholipase A2, group VII (platelet-activating factor acetylhydrolase, plasma)              | AK005158  | 2050.1  | 8596.02 | 4.19 |
| Ndufs1: NADH dehydrogenase (ubiquinone) Fe-S protein 1                                                | AK017924  | 45.13   | 188.62  | 4.18 |
| Mycl1: v-myc myelocytomatosis viral oncogene homolog 1, lung carcinoma derived (avian)                | BI687857  | 62.58   | 260.83  | 4.17 |
| Dock9 /// LOC670309: dedicator of cytokinesis 9 /// similar to Dedicator of cytokinesis protein 9 (Cd | AA410148  | 230.42  | 960.57  | 4.17 |
| Alas1: Aminolevulinic acid synthase 1                                                                 | BM021574  | 32.89   | 136.97  | 4.16 |
| Tanc2: Tetratricopeptide repeat, ankyrin repeat and coiled-coil containing 2                          | BB520952  | 40.3    | 167.56  | 4.16 |
| Arvcf: armadillo repeat gene deleted in velo-cardio-facial syndrome                                   | BE947943  | 45.04   | 187.07  | 4.15 |
| Cpeb2: cytoplasmic polyadenylation element binding protein 2                                          | BB235708  | 121.63  | 504.61  | 4.15 |
| Osmr: oncostatin M receptor                                                                           | AB015978  | 34.59   | 143.34  | 4.14 |
| Dscam: Down syndrome cell adhesion molecule                                                           | BE947485  | 93.35   | 386.48  | 4.14 |
| AI956758: expressed sequence AI956758                                                                 | AV234963  | 54.09   | 224.18  | 4.14 |
| Timp2: tissue inhibitor of metalloproteinase 2                                                        | M93954    | 86.07   | 354.64  | 4.12 |
| Scn8a: sodium channel, voltage-gated, type VIII, alpha                                                | BB429612  | 134.44  | 552.98  | 4.11 |
| Rarres1: retinoic acid receptor responder (tazarotene induced) 1                                      | BB035017  | 47.76   | 196.09  | 4.11 |
| Cobl1: Cobl-like 1                                                                                    | AV080881  | 210.03  | 862.69  | 4.11 |
| Sfrs8: Splicing factor, arginine/serine-rich 8                                                        | BM234702  | 68.46   | 280.96  | 4.1  |
| Dock9 /// LOC670309: dedicator of cytokinesis 9 /// similar to Dedicator of cytokinesis protein 9 (Cd | BB795072  | 182.35  | 746.47  | 4.09 |
| Wasf1: WASP family 1                                                                                  | AW551910  | 118.4   | 484.69  | 4.09 |
| Chn2: Chimerin (chimaerin) 2                                                                          | BB707145  | 73.77   | 301.78  | 4.09 |
| Pcdh10: protocadherin 10                                                                              | AF334801  | 158.22  | 645.16  | 4.08 |
| Scrg1: scrapie responsive gene 1                                                                      | NM_009136 | 635.88  | 2585.63 | 4.07 |
| Pcdh7: protocadherin 7                                                                                | BE647243  | 33.46   | 136.26  | 4.07 |
| Xkr6: X Kell blood group precursor related family member 6 homolog                                    | BB131963  | 95.56   | 388.88  | 4.07 |
| 9330184L24Rik: RIKEN cDNA 9330184L24 gene                                                             | BB083737  | 40.27   | 163.8   | 4.07 |
| Klhl5: kelch-like 5 (Drosophila)                                                                      | BB807192  | 36.32   | 147.92  | 4.07 |
| Pcdhb21: protocadherin beta 21                                                                        | NM_053146 | 128.31  | 521.41  | 4.06 |
| Cspg4: chondroitin sulfate proteoglycan 4                                                             | BB377873  | 59.43   | 241.34  | 4.06 |
| Pcdhb7: protocadherin beta 7                                                                          | NM_053132 | 76.96   | 312.29  | 4.06 |
| Mtm1: X-linked myotubular myopathy gene 1                                                             | BG976607  | 237.04  | 963.34  | 4.06 |
| Pcdh10: protocadherin 10                                                                              | BB077413  | 434.4   | 1753.96 | 4.04 |
| Cox4nb: COX4 neighbor                                                                                 | BI734783  | 150.49  | 607.88  | 4.04 |
| D6Wsu116e: DNA segment, Chr 6, Wayne State University 116, expressed                                  | BM197316  | 59.01   | 237.29  | 4.02 |
| Pdgfrb: platelet derived growth factor receptor, beta polypeptide                                     | AA499047  | 57.82   | 231.79  | 4.01 |
| 1810041L15Rik: RIKEN cDNA 1810041L15 gene                                                             | BI734299  | 148.52  | 596.3   | 4.01 |
| AW048948: expressed sequence AW048948                                                                 | BQ174502  | 166.6   | 667.5   | 4.01 |
| 12 days embryo spinal ganglion cDNA, RIKEN full-length enriched library, clone:D130065D02 produc      | BB460036  | 173.71  | 696.19  | 4.01 |
| Sorbs1: sorbin and SH3 domain containing 1                                                            | BB372866  | 147.33  | 590.17  | 4.01 |
| LOC668066: Similar to gonadotropin inducible ovarian transcription factor 1                           | BB246383  | 93.5    | 373.4   | 3.99 |
| Txnip: thioredoxin interacting protein                                                                | AF173681  | 322.46  | 1284.57 | 3.98 |
| Tmem108: transmembrane protein 108                                                                    | BB293313  | 209.81  | 834.6   | 3.98 |
| Sema5a: sema domain, seven thrombospondin repeats (type 1 and type 1-like), transmembrane doi         | AV375653  | 279.78  | 1106.65 | 3.96 |
| Timp3: tissue inhibitor of metalloproteinase 3                                                        | BI111620  | 342.28  | 1353.27 | 3.95 |
| Nrxn2: neurexin II                                                                                    | BE949064  | 151.87  | 598.75  | 3.94 |
| 2600009P04Rik: RIKEN cDNA 2600009P04 gene                                                             | AV334527  | 172.45  | 677.19  | 3.93 |
| Apod: apolipoprotein D                                                                                | NM_007470 | 44.81   | 175.44  | 3.92 |
| Angptl4: angiopoietin-like 4                                                                          | NM_020581 | 52.96   | 207.8   | 3.92 |
| Tmcc2: transmembrane and coiled-coil domains 2                                                        | AK004359  | 160.16  | 627.88  | 3.92 |
| Sytl2: synaptotagmin-like 2                                                                           | NM_031394 | 46.52   | 181.28  | 3.9  |
| Lect1: leukocyte cell derived chemotaxin 1                                                            | NM_010701 | 36.16   | 141.15  | 3.9  |
| Prkg2: protein kinase, cGMP-dependent, type II                                                        | BB363188  | 73.37   | 286.51  | 3.9  |
| Sft2d3: SFT2 domain containing 3                                                                      | AK005221  | 58.64   | 228.48  | 3.9  |
| Masp1: mannan-binding lectin serine peptidase 1                                                       | AB049755  | 70.53   | 274.65  | 3.89 |
| Mm.133035.1                                                                                           | BB283493  | 102.36  | 396.83  | 3.88 |
| Lypd1: Ly6/Plaur domain containing 1                                                                  | AK012406  | 43.28   | 167.55  | 3.87 |
| Mm.24733.2                                                                                            | BQ176610  | 211.48  | 818.36  | 3.87 |
| Lrrtm3: leucine rich repeat transmembrane neuronal 3                                                  | BM224801  | 38.75   | 149.76  | 3.87 |
| Slc45a4: solute carrier family 45, member 4                                                           | BB082429  | 69.7    | 268.47  | 3.85 |
| Gpr155: G protein-coupled receptor 155                                                                | BB762731  | 122.44  | 470.27  | 3.84 |

|                                                                                                       |           |         |         |      |
|-------------------------------------------------------------------------------------------------------|-----------|---------|---------|------|
| Dlgap1: discs, large (Drosophila) homolog-associated protein 1                                        | AK016873  | 69.23   | 265.53  | 3.84 |
| Lrrtm3: leucine rich repeat transmembrane neuronal 3                                                  | BM224801  | 54.85   | 210.5   | 3.84 |
| Stom: stomatin                                                                                        | AF093620  | 104.06  | 398.62  | 3.83 |
| 2810049E08Rik: RIKEN cDNA 2810049E08 gene                                                             | AK012929  | 57.85   | 221.51  | 3.83 |
| Mm.181879.1                                                                                           | AV367169  | 40.39   | 154.63  | 3.83 |
| Oprl1: opioid receptor-like 1                                                                         | X91813    | 36.35   | 138.75  | 3.82 |
| Sh3d19: SH3 domain protein D19                                                                        | NM_012059 | 134.31  | 509.72  | 3.8  |
| Pcdhb20: protocadherin beta 20                                                                        | NM_053145 | 161.27  | 611.17  | 3.79 |
| Fbln5: fibulin 5                                                                                      | NM_011812 | 37.25   | 140.84  | 3.78 |
| Sorl1: sortilin-related receptor, LDLR class A repeats-containing                                     | BI648081  | 155.07  | 585.51  | 3.78 |
| Dkk3: dickkopf homolog 3 (Xenopus laevis)                                                             | AK004853  | 77.6    | 293.44  | 3.78 |
| Transcribed locus, strongly similar to XP_579813.1 hypothetical protein XP_579813 [Rattus norvegicus] | BB251859  | 76.23   | 288.5   | 3.78 |
| Man1c1: mannosidase, alpha, class 1C, member 1                                                        | BB392263  | 281.95  | 1062.65 | 3.77 |
| Matn2: matrilin 2                                                                                     | BC005429  | 75.75   | 284.73  | 3.76 |
| Dpp10: dipeptidylpeptidase 10                                                                         | BQ176414  | 54.43   | 204.44  | 3.76 |
| Abtb2: ankyrin repeat and BTB (POZ) domain containing 2                                               | BB621938  | 556.24  | 2087.5  | 3.75 |
| 6030490B17Rik: RIKEN cDNA 6030490B17 gene                                                             | BB392503  | 77.95   | 292.04  | 3.75 |
| Mm.211374.1                                                                                           | BB770903  | 72.27   | 270.76  | 3.75 |
| Phyhlpl: phytanoyl-CoA hydroxylase interacting protein-like                                           | AI267048  | 836.02  | 3126.73 | 3.74 |
| S100a1: S100 calcium binding protein A1                                                               | BC005590  | 130.94  | 488.81  | 3.73 |
| Slc30a10: solute carrier family 30, member 10                                                         | BB540543  | 66.27   | 246.92  | 3.73 |
| Tmcc3: transmembrane and coiled coil domains 3                                                        | BB711990  | 522.21  | 1948.8  | 3.73 |
| Usp20: ubiquitin specific peptidase 20                                                                | AK006800  | 50.61   | 188.44  | 3.72 |
| Id4: inhibitor of DNA binding 4                                                                       | BB121406  | 1553.7  | 5777.96 | 3.72 |
| Slc9a9: solute carrier family 9 (sodium/hydrogen exchanger), isoform 9                                | AI854429  | 88.02   | 327.16  | 3.72 |
| Sox10: SRY-box containing gene 10                                                                     | BC025171  | 109.6   | 406.84  | 3.71 |
| 6430537I21Rik: RIKEN cDNA 6430537I21 gene                                                             | AV343428  | 208.6   | 773.17  | 3.71 |
| Alcam: Activated leukocyte cell adhesion molecule                                                     | AU041266  | 47.69   | 176.83  | 3.71 |
| Serpina3n: serine (or cysteine) peptidase inhibitor, clade A, member 3N                               | NM_009252 | 134.82  | 498.66  | 3.7  |
| Papss2: 3'-phosphoadenosine 5'-phosphosulfate synthase 2                                              | BF780807  | 148.87  | 551.43  | 3.7  |
| Hspa2: heat shock protein 2                                                                           | BC004714  | 170.8   | 629.4   | 3.69 |
| Pftk1: PFTAIR protein kinase 1                                                                        | BB027193  | 68.59   | 253.14  | 3.69 |
| Tox: Thymocyte selection-associated HMG box gene                                                      | BM245368  | 61.78   | 227.74  | 3.69 |
| Pcdh9 /// LOC638275: protocadherin 9 /// similar to protocadherin 9 isoform 1 precursor               | BQ177394  | 585.29  | 2154.31 | 3.68 |
| Epb4.1l3: erythrocyte protein band 4.1-like 3                                                         | NM_013813 | 161.67  | 594.04  | 3.67 |
| Shroom2 /// LOC670546: shroom family member 2 /// similar to Apical-like protein (APXL protein)       | BQ176992  | 625.49  | 2294.35 | 3.67 |
| Sfxn5: sideroflexin 5                                                                                 | BB379739  | 612.71  | 2250.4  | 3.67 |
| Atp1a2: ATPase, Na+/K+ transporting, alpha 2 polypeptide                                              | AV325919  | 1669.2  | 6124.73 | 3.67 |
| Fxyd6: FXD domain-containing ion transport regulator 6                                                | AB032010  | 380.66  | 1391.62 | 3.66 |
| 1110032A03Rik: RIKEN cDNA 1110032A03 gene                                                             | NM_023483 | 173.08  | 630.72  | 3.64 |
| Mbp: myelin basic protein                                                                             | BB181247  | 68.73   | 250.47  | 3.64 |
| Prickle1: prickle like 1 (Drosophila)                                                                 | BC022643  | 114.63  | 417.18  | 3.64 |
| 4833418A01Rik: RIKEN cDNA 4833418A01 gene                                                             | BM213879  | 126.89  | 461.33  | 3.64 |
| 4930402H24Rik: RIKEN cDNA 4930402H24 gene                                                             | C78926    | 418.18  | 1522.71 | 3.64 |
| E130308A19Rik: RIKEN cDNA E130308A19 gene                                                             | BE948602  | 146.33  | 532.25  | 3.64 |
| Sorl1: sortilin-related receptor, LDLR class A repeats-containing                                     | AK013519  | 113.99  | 413.75  | 3.63 |
| Id2: inhibitor of DNA binding 2                                                                       | NM_010496 | 1140.39 | 4123.83 | 3.62 |
| Chn2: chimerin (chimaerin) 2                                                                          | AK006398  | 372.83  | 1350.49 | 3.62 |
| Tspan17: tetraspanin 17                                                                               | AI844703  | 70.88   | 256.56  | 3.62 |
| Gpiap1: GPI-anchored membrane protein 1                                                               | BM203355  | 345.87  | 1252.7  | 3.62 |
| Sgk: serum/glucocorticoid regulated kinase                                                            | NM_011361 | 903.87  | 3266.72 | 3.61 |
| Masp1: mannan-binding lectin serine peptidase 1                                                       | BB477214  | 73.24   | 264.4   | 3.61 |
| C030014M07Rik /// LOC668212: RIKEN cDNA C030014M07 gene /// similar to RIKEN cDNA C920001             | BB795377  | 126.49  | 457.05  | 3.61 |
| Lgi3: leucine-rich repeat LGI family, member 3                                                        | BB187947  | 82.1    | 296.74  | 3.61 |
| Snx22: sorting nexin 22                                                                               | AV333851  | 56.95   | 204.22  | 3.59 |
| Olig1: oligodendrocyte transcription factor 1                                                         | AB038696  | 1350.65 | 4836.5  | 3.58 |
| Id2: inhibitor of DNA binding 2                                                                       | AK013239  | 80.9    | 289.41  | 3.58 |
| 4931414P19Rik: RIKEN cDNA 4931414P19 gene                                                             | AK016457  | 82.71   | 296.05  | 3.58 |
| Chic2: Cysteine-rich hydrophobic domain 2                                                             | AV024777  | 137.14  | 490.73  | 3.58 |
| Cutl2: cut-like 2 (Drosophila)                                                                        | BB129488  | 117.63  | 421.39  | 3.58 |
| Pcdhb3: protocadherin beta 3                                                                          | NM_053128 | 57.23   | 204.27  | 3.57 |
| Phyhlpl: phytanoyl-CoA hydroxylase interacting protein-like                                           | BB131270  | 914.74  | 3268.16 | 3.57 |
| Sox6: SRY-box containing gene 6                                                                       | AV281802  | 540.64  | 1930.3  | 3.57 |
| Pcdh9: Protocadherin 9                                                                                | AW492836  | 57.79   | 206.28  | 3.57 |
| Tox: Thymocyte selection-associated HMG box gene                                                      | BM124834  | 40.4    | 144.43  | 3.57 |
| Apoc1: apolipoprotein C-I                                                                             | NM_007469 | 49.66   | 176.73  | 3.56 |
| Transcribed locus                                                                                     | BB342212  | 100.02  | 356.02  | 3.56 |
| Ick: intestinal cell kinase                                                                           | BB376918  | 246.61  | 878.44  | 3.56 |
| Timp3: tissue inhibitor of metalloproteinase 3                                                        | BI111620  | 314.51  | 1115.01 | 3.55 |
| Il6st: interleukin 6 signal transducer                                                                | AA717838  | 251.45  | 893.76  | 3.55 |
| Sgip1: SH3-domain GRB2-like (endophilin) interacting protein 1                                        | AK014022  | 169.68  | 601.85  | 3.55 |
| 5730433N10Rik: RIKEN cDNA 5730433N10 gene                                                             | AK017612  | 115.64  | 410.79  | 3.55 |
| Cyp2j6: cytochrome P450, family 2, subfamily j, polypeptide 6                                         | NM_010008 | 215.8   | 761.2   | 3.53 |
| 1200015N20Rik: RIKEN cDNA 1200015N20 gene                                                             | BB461323  | 593.23  | 2093.11 | 3.53 |
| Slc22a21: solute carrier family 22 (organic cation transporter), member 21                            | NM_019723 | 77.1    | 271.78  | 3.53 |
| Car8: carbonic anhydrase 8                                                                            | BB125515  | 60.74   | 214.3   | 3.53 |
| Snag1: sorting nexin associated golgi protein 1                                                       | AV344473  | 285.86  | 1005.93 | 3.52 |
| Timp3: tissue inhibitor of metalloproteinase 3                                                        | BI111620  | 427.91  | 1504.18 | 3.52 |
| Rnf144: ring finger protein 144                                                                       | AI414399  | 46.66   | 164.15  | 3.52 |
| Sox6: SRY-box containing gene 6                                                                       | D61689    | 353.56  | 1245.52 | 3.52 |
| Phactr1: phosphatase and actin regulator 1                                                            | AV259240  | 91.54   | 321.98  | 3.52 |
| Ptpre: Protein tyrosine phosphatase, receptor type, E                                                 | BE852843  | 40.25   | 141.48  | 3.52 |
| S100a1: S100 calcium binding protein A1                                                               | AI266795  | 326.26  | 1146.71 | 3.51 |
| Sgip1: SH3-domain GRB2-like (endophilin) interacting protein 1                                        | AV344708  | 98.21   | 343.66  | 3.5  |
| Cnp1: cyclic nucleotide phosphodiesterase 1                                                           | BB251922  | 2593.27 | 9070.35 | 3.5  |
| B930037P14Rik: RIKEN cDNA B930037P14 gene                                                             | BM233059  | 61.9    | 216.46  | 3.5  |
| Sqstm1: Sequestosome 1                                                                                | BM237736  | 47.17   | 164.53  | 3.49 |
| Dock4: dedicator of cytokinesis 4                                                                     | BB428868  | 128.73  | 449.82  | 3.49 |
| Cmtm5: CKLF-like MARVEL transmembrane domain containing 5                                             | AV029626  | 304.58  | 1061.17 | 3.48 |



|                                                                                                            |           |         |         |      |
|------------------------------------------------------------------------------------------------------------|-----------|---------|---------|------|
| Mm.87669.1                                                                                                 | AV348753  | 85.44   | 297.75  | 3.48 |
| Adult male hippocampus cDNA, RIKEN full-length enriched library, clone:C630028A20 product:unclassified     | BB429361  | 64.93   | 225.77  | 3.48 |
| Plxdc2: plexin domain containing 2                                                                         | BB559706  | 77.84   | 270.37  | 3.47 |
| 3110027N22Rik: RIKEN cDNA 3110027N22 gene                                                                  | BB753814  | 70.77   | 245.49  | 3.47 |
| Dock10 /// LOC630691: dedicator of cytokinesis 10 /// similar to Dedicator of cytokinesis protein 10       | BB763030  | 92.56   | 321.1   | 3.47 |
| Cyp7b1: cytochrome P450, family 7, subfamily b, polypeptide 1                                              | NM_007825 | 126.51  | 437.28  | 3.46 |
| Cntf /// Zfp91: ciliary neurotrophic factor /// zinc finger protein 91                                     | NM_053007 | 259.04  | 896.32  | 3.46 |
| Atp1a2: ATPase, Na+/K+ transporting, alpha 2 polypeptide                                                   | AI845177  | 616.39  | 2133.99 | 3.46 |
| Pim3: proviral integration site 3                                                                          | BC017621  | 235.57  | 816.09  | 3.46 |
| Pcdh7: protocadherin 7                                                                                     | NM_018764 | 55.32   | 191.01  | 3.45 |
| Timp2: tissue inhibitor of metalloproteinase 2                                                             | BF168458  | 502.09  | 1732.24 | 3.45 |
| Transcribed locus                                                                                          | BF721979  | 44.67   | 154.14  | 3.45 |
| 9430041J12Rik: RIKEN cDNA 9430041J12 gene                                                                  | BB093175  | 45.48   | 156.37  | 3.44 |
| Aph1b: anterior pharynx defective 1b homolog (C. elegans)                                                  | BM219801  | 164.95  | 566.16  | 3.43 |
| Ednrb: endothelin receptor type B                                                                          | BB451714  | 939.08  | 3215.14 | 3.42 |
| Gfap: glial fibrillary acidic protein                                                                      | BB183081  | 1373.61 | 4700.1  | 3.42 |
| Timp2: tissue inhibitor of metalloproteinase 2                                                             | BF168458  | 352.69  | 1205.93 | 3.42 |
| Pcdh9: Protocadherin 9                                                                                     | BB080017  | 245.01  | 837.05  | 3.42 |
| B930098A02Rik: RIKEN cDNA B930098A02 gene                                                                  | BB794854  | 305.16  | 1045.01 | 3.42 |
| Thsd7a: thrombospondin, type I, domain containing 7A                                                       | BE690988  | 52.49   | 178.46  | 3.4  |
| Nov1 /// LOC664883: neuro-oncological ventral antigen 1 /// similar to neuro-oncological ventral antigen 1 | BB627486  | 791.73  | 2686.66 | 3.39 |
| E130308A19Rik: RIKEN cDNA E130308A19 gene                                                                  | BI794701  | 156.6   | 531.12  | 3.39 |
| Tprkb: Tp53r binding protein                                                                               | BC027413  | 113.83  | 384.27  | 3.38 |
| Efh1: EF hand domain containing 1                                                                          | BC019531  | 128.68  | 434.58  | 3.38 |
| Cacng4: calcium channel, voltage-dependent, gamma subunit 4                                                | BQ176350  | 107.26  | 363.02  | 3.38 |
| S100a6: S100 calcium binding protein A6 (calcyclin)                                                        | NM_011313 | 559.54  | 1885.98 | 3.37 |
| Chst1: carbohydrate (keratan sulfate Gal-6) sulfotransferase 1                                             | NM_023850 | 103.56  | 348.35  | 3.36 |
| 5930433N17Rik: RIKEN cDNA 5930433N17 gene                                                                  | C85455    | 66.2    | 222.74  | 3.36 |
| Plxnc1: plexin C1                                                                                          | BB476707  | 235.53  | 788.92  | 3.35 |
| Add3: adducin 3 (gamma)                                                                                    | BI410363  | 569.91  | 1910.94 | 3.35 |
| Cspg2: chondroitin sulfate proteoglycan 2                                                                  | BM251152  | 218.32  | 730.58  | 3.35 |
| AI427515: expressed sequence AI427515                                                                      | AV173683  | 60.02   | 201.29  | 3.35 |
| Ppp1r13b: protein phosphatase 1, regulatory (inhibitor) subunit 13B                                        | BG064715  | 48.62   | 163.11  | 3.35 |
| Rusc2: RUN and SH3 domain containing 2                                                                     | BC024790  | 155.08  | 518.71  | 3.34 |
| Bace1: beta-site APP cleaving enzyme 1                                                                     | BB114336  | 442.07  | 1477.73 | 3.34 |
| Zfp608: Zinc finger protein 608                                                                            | BE200446  | 159.22  | 532.51  | 3.34 |
| Sdf4: stromal cell derived factor 4                                                                        | U45977    | 48.04   | 159.87  | 3.33 |
| Zfp365 /// LOC674611: zinc finger protein 365 /// similar to zinc finger protein 365                       | AV327248  | 399.19  | 1329.08 | 3.33 |
| Mapk8ip2: mitogen-activated protein kinase 8 interacting protein 2                                         | AW536912  | 58.63   | 195.31  | 3.33 |
| Celsr1: cadherin EGF LAG seven-pass G-type receptor 1                                                      | NM_009886 | 245.99  | 817.42  | 3.32 |
| Dock10: Dedicator of cytokinesis 10                                                                        | BM247032  | 88.86   | 294.76  | 3.32 |
| Ddhd1: DDHD domain containing 1                                                                            | AV265534  | 81.22   | 268.87  | 3.31 |
| LOC545228: hypothetical protein LOC545228                                                                  | AA175473  | 94.22   | 311.8   | 3.31 |
| Tcf3: transcription factor 3                                                                               | NM_009332 | 504.03  | 1661.5  | 3.3  |
| Matn2: matrilin 2                                                                                          | BB338441  | 166.66  | 549.38  | 3.3  |
| 1700047I17Rik /// LOC665155: RIKEN cDNA 1700047I17 gene /// similar to signal recognition particle         | BB824055  | 85.06   | 280.49  | 3.3  |
| Oprl1: opioid receptor-like 1                                                                              | AF043276  | 86.57   | 285.17  | 3.29 |
| Hlf: hepatic leukemia factor                                                                               | BB744589  | 59.35   | 195.35  | 3.29 |
| 2900042E01Rik: RIKEN cDNA 2900042E01 gene                                                                  | BQ176287  | 649.23  | 2135.48 | 3.29 |
| Itsn1: Intersectin 1 (SH3 domain protein 1A)                                                               | BG074656  | 65.68   | 216.08  | 3.29 |
| Lcorl: ligand dependent nuclear receptor corepressor-like                                                  | AV231984  | 328.73  | 1080.67 | 3.29 |
| Gpr137b: G protein-coupled receptor 137B                                                                   | AW546472  | 233.56  | 765.96  | 3.28 |
| AI452195: expressed sequence AI452195                                                                      | BB303582  | 460.62  | 1510.98 | 3.28 |
| Pcdh10: protocadherin 10                                                                                   | AV341417  | 470.45  | 1544.88 | 3.28 |
| Dlgap1: discs, large (Drosophila) homolog-associated protein 1                                             | AK016873  | 117.97  | 387.31  | 3.28 |
| Hrasls3: HRAS like suppressor 3                                                                            | BB404920  | 235.5   | 770.67  | 3.27 |
| Malat1: metastasis associated lung adenocarcinoma transcript 1 (non-coding RNA)                            | AW012617  | 370.47  | 1208.82 | 3.26 |
| Prei4: preimplantation protein 4                                                                           | AK009137  | 256.68  | 836.22  | 3.26 |
| Gclci1: Glucocorticoid induced transcript 1                                                                | BM247146  | 89.67   | 292.36  | 3.26 |
| Shc4: SHC (Src homology 2 domain containing) family, member 4                                              | AV353605  | 151.25  | 493.71  | 3.26 |
| Tspan7: tetraspanin 7                                                                                      | AF052492  | 719.45  | 2334.92 | 3.25 |
| Dpysl4: dihydropyrimidinase-like 4                                                                         | NM_011993 | 271.04  | 880.66  | 3.25 |
| Tmem47: transmembrane protein 47                                                                           | NM_138751 | 920.83  | 2990.75 | 3.25 |
| Rtn4: reticulon 4                                                                                          | BG072267  | 181.4   | 588.91  | 3.25 |
| Jmjd1c: Jumonji domain containing 1C                                                                       | BB667902  | 313.07  | 1016.71 | 3.25 |
| Lrp1b: low density lipoprotein-related protein 1B (deleted in tumors)                                      | BB129193  | 76.9    | 249.81  | 3.25 |
| Khdrbs2: KH domain containing, RNA binding, signal transduction associated 2                               | NM_133235 | 94.82   | 307.3   | 3.24 |
| Gatm: glycine amidinotransferase (L-arginine:glycine amidinotransferase)                                   | AW108522  | 503.7   | 1632.68 | 3.24 |
| Mus musculus, clone IMAGE:5363897, mRNA                                                                    | BQ174424  | 81.76   | 264.93  | 3.24 |
| Cdc37l1: Cell division cycle 37 homolog (S. cerevisiae)-like 1                                             | BB391093  | 62.94   | 203.99  | 3.24 |
| Cspg2: chondroitin sulfate proteoglycan 2                                                                  | NM_019389 | 324.76  | 1049.69 | 3.23 |
| E130308A19Rik: RIKEN cDNA E130308A19 gene                                                                  | BM937727  | 170.95  | 552.54  | 3.23 |
| Srr: serine racemase                                                                                       | AK002636  | 111.57  | 360.48  | 3.23 |
| Mycl1: v-myc myelocytomatosis viral oncogene homolog 1, lung carcinoma derived (avian)                     | BI687857  | 72.22   | 232.84  | 3.22 |
| 2210418O10Rik: RIKEN cDNA 2210418O10 gene                                                                  | NM_029813 | 60.2    | 193.85  | 3.22 |
| Ank: progressive ankylosis                                                                                 | NM_020332 | 702.11  | 2257.76 | 3.22 |
| 1810041L15Rik: RIKEN cDNA 1810041L15 gene                                                                  | BQ177117  | 372.94  | 1199.43 | 3.22 |
| Hist2h2aa1 /// Hist1h2ad /// Hist1h2an /// Hist2h2ac /// Hist2h2aa2 /// Hist2h2ab: histone cluster 2       | BC010564  | 220.32  | 707.53  | 3.21 |
| Rftn2: raftlin family member 2                                                                             | BE225664  | 294.63  | 946.67  | 3.21 |
| Gfra1: glial cell line derived neurotrophic factor family receptor alpha 1                                 | AV221299  | 77.98   | 250.42  | 3.21 |
| Adult male colon cDNA, RIKEN full-length enriched library, clone:9030003C19 product:unclassified           | BB210964  | 60.91   | 195.52  | 3.21 |
| Mm.39542.1                                                                                                 | AI839084  | 53.5    | 171.66  | 3.21 |
| C79601: expressed sequence C79601                                                                          | C79601    | 831.01  | 2667.82 | 3.21 |
| Zfhx1b: zinc finger homeobox 1b                                                                            | NM_015753 | 562.44  | 1800.36 | 3.2  |
| Atp1a2: ATPase, Na+/K+ transporting, alpha 2 polypeptide                                                   | BC025807  | 808     | 2589.15 | 3.2  |
| Emp2: epithelial membrane protein 2                                                                        | BE571790  | 1260.72 | 4032.56 | 3.2  |
| Plxnc1: plexin C1                                                                                          | BB476707  | 151.43  | 485.28  | 3.2  |
| Pink1: PTEN induced putative kinase 1                                                                      | AF316872  | 868.18  | 2775.39 | 3.2  |
| Rarb: retinoic acid receptor, beta                                                                         | BB266455  | 78.09   | 249.74  | 3.2  |

|                                                                                                   |           |         |         |      |
|---------------------------------------------------------------------------------------------------|-----------|---------|---------|------|
| Dixdc1: DIX domain containing 1                                                                   | BB758432  | 198.24  | 634.57  | 3.2  |
| A1851453: expressed sequence A1851453                                                             | A1851453  | 167.55  | 536.83  | 3.2  |
| Gpam: glycerol-3-phosphate acyltransferase, mitochondrial                                         | BC019201  | 237.7   | 758     | 3.19 |
| Il6st: interleukin 6 signal transducer                                                            | AK017211  | 781.22  | 2484.25 | 3.18 |
| E130308A19Rik: RIKEN cDNA E130308A19 gene                                                         | B1794748  | 220.46  | 700.72  | 3.18 |
| Aplp1: amyloid beta (A4) precursor-like protein 1                                                 | NM_007467 | 285.64  | 904.86  | 3.17 |
| Traf4: Tnf receptor associated factor 4                                                           | NM_009423 | 161.5   | 512.2   | 3.17 |
| Fmo1: flavin containing monooxygenase 1                                                           | BC011229  | 64.48   | 204.72  | 3.17 |
| Sorbs1: sorbin and SH3 domain containing 1                                                        | AF078667  | 523.12  | 1657.01 | 3.17 |
| Ednrb: endothelin receptor type B                                                                 | BB770914  | 1192.04 | 3773.94 | 3.17 |
| Epb4.1l2: erythrocyte protein band 4.1-like 2                                                     | BE951907  | 417.29  | 1324.11 | 3.17 |
| Sdc4: syndecan 4                                                                                  | BC005679  | 390.22  | 1236.46 | 3.17 |
| 9530057J20Rik /// EG665756 /// EG665787: RIKEN cDNA 9530057J20 gene /// predicted gene, EG6       | BE945468  | 59.29   | 188.05  | 3.17 |
| E130308A19Rik: RIKEN cDNA E130308A19 gene                                                         | BB789822  | 221.6   | 703.24  | 3.17 |
| Hist2h2aa1 /// Hist1h2ad /// Hist1h2an /// Hist2h2ac /// Hist2h2ab: histone cluster 2             | BC010564  | 257.96  | 816.28  | 3.16 |
| Ash2l: ash2 (absent, small, or homeotic)-like (Drosophila)                                        | BM207355  | 54.34   | 171.64  | 3.16 |
| Mtm1: X-linked myotubular myopathy gene 1                                                         | BG976607  | 153.58  | 485.37  | 3.16 |
| 1700019G17Rik: RIKEN cDNA 1700019G17 gene                                                         | BM214338  | 113.02  | 357.3   | 3.16 |
| 4632427E13Rik: RIKEN cDNA 4632427E13 gene                                                         | AK019505  | 255.29  | 806.58  | 3.16 |
| Pdcd4: Programmed cell death 4                                                                    | BB732233  | 105.7   | 333.94  | 3.16 |
| Bdh1: 3-hydroxybutyrate dehydrogenase, type 1                                                     | BF322712  | 177.84  | 560.91  | 3.15 |
| Kit: kit oncogene                                                                                 | X65997    | 124.82  | 392.58  | 3.15 |
| Chic2: cysteine-rich hydrophobic domain 2                                                         | AK015681  | 915.78  | 2888.19 | 3.15 |
| Rims2: regulating synaptic membrane exocytosis 2                                                  | AV348556  | 75.6    | 237.9   | 3.15 |
| Sox6: SRY-box containing gene 6                                                                   | AJ010605  | 972.53  | 3054.65 | 3.14 |
| Dpysl4: dihydropyrimidinase-like 4                                                                | NM_011993 | 148.62  | 465.73  | 3.13 |
| Epb4.1l2: erythrocyte protein band 4.1-like 2                                                     | BE951907  | 824.9   | 2585.79 | 3.13 |
| 3110001I20Rik: RIKEN cDNA 3110001I20 gene                                                         | BB427489  | 133.62  | 418.51  | 3.13 |
| Asrgl1: asparaginase like 1                                                                       | AU040643  | 914.16  | 2860.95 | 3.13 |
| Klhdc8b: kelch domain containing 8B                                                               | AK019849  | 94.57   | 296.37  | 3.13 |
| Lcorl: Ligand dependent nuclear receptor corepressor-like                                         | B1076539  | 58.32   | 182.5   | 3.13 |
| Preb: prolactin regulatory element binding                                                        | AV362891  | 67.21   | 210.6   | 3.13 |
| Dock4: dedicator of cytokinesis 4                                                                 | BB045510  | 87.43   | 273.44  | 3.13 |
| Gfap: glial fibrillary acidic protein                                                             | BB183081  | 1725.8  | 5389.87 | 3.12 |
| Gabrg1: gamma-aminobutyric acid (GABA-A) receptor, subunit gamma 1                                | AF156490  | 182.14  | 567.93  | 3.12 |
| 2810013P06Rik: RIKEN cDNA 2810013P06 gene                                                         | BM246000  | 95.65   | 298.55  | 3.12 |
| Mm.213271.1                                                                                       | BB200981  | 51.56   | 160.79  | 3.12 |
| Pcdh9 /// LOC638275: protocadherin 9 /// similar to protocadherin 9 isoform 1 precursor           | AW048370  | 225.63  | 704.96  | 3.12 |
| Galnt10: UDP-N-acetyl-alpha-D-galactosamine:polypeptide N-acetylgalactosaminyltransferase 10      | BG965198  | 79.95   | 248.37  | 3.11 |
| Sema4d: sema domain, immunoglobulin domain (Ig), transmembrane domain (TM) and short cytopl       | AV256403  | 160.59  | 499.41  | 3.11 |
| Epb4.1l2: erythrocyte protein band 4.1-like 2                                                     | BE951907  | 1014.27 | 3149.52 | 3.11 |
| 2600009P04Rik: RIKEN cDNA 2600009P04 gene                                                         | AV334527  | 383.87  | 1192.17 | 3.11 |
| Gpr137b: G protein-coupled receptor 137B                                                          | AK010724  | 468.76  | 1456.14 | 3.11 |
| Metap1: methionine aminopeptidase-like 1                                                          | AJ414378  | 92.76   | 288.54  | 3.11 |
| Scfd2: sec1 family domain containing 2                                                            | BB821363  | 60.02   | 186.54  | 3.11 |
| Sft2d3: SFT2 domain containing 3                                                                  | BE688374  | 54.61   | 169.66  | 3.11 |
| Dixdc1: DIX domain containing 1                                                                   | BF471786  | 47.7    | 148.15  | 3.11 |
| Ctsb: cathepsin B                                                                                 | M14222    | 155.31  | 481.65  | 3.1  |
| Lphn3: latrophilin 3                                                                              | BE945410  | 244.6   | 759.42  | 3.1  |
| Impact: imprinted and ancient                                                                     | BB524087  | 47.65   | 147.92  | 3.1  |
| Car11: carbonic anhydrase 11                                                                      | BC019393  | 144.8   | 447.24  | 3.09 |
| Strn: striatin, calmodulin binding protein                                                        | BG519214  | 381.83  | 1181.1  | 3.09 |
| Epas1: Endothelial PAS domain protein 1                                                           | BI647951  | 443.49  | 1370.15 | 3.09 |
| Ppm1k: protein phosphatase 1K (PP2C domain containing)                                            | A1482429  | 188.81  | 583.3   | 3.09 |
| Gm440: gene model 440, (NCBI)                                                                     | BG075955  | 195.37  | 602.64  | 3.08 |
| Tmcc3: transmembrane and coiled coil domains 3                                                    | BB771888  | 670.42  | 2066.11 | 3.08 |
| Pdk4: pyruvate dehydrogenase kinase, isoenzyme 4                                                  | NM_013743 | 100.38  | 308.44  | 3.07 |
| Plxnb1: plexin B1                                                                                 | BM119522  | 337.34  | 1035.27 | 3.07 |
| Klh124: kelch-like 24 (Drosophila)                                                                | BM124262  | 138.45  | 425.08  | 3.07 |
| Pak7: p21 (CDKN1A)-activated kinase 7                                                             | BM228403  | 59.85   | 183.5   | 3.07 |
| Gab1: growth factor receptor bound protein 2-associated protein 1                                 | NM_021356 | 362.62  | 1108.21 | 3.06 |
| Lrg3: leucine-rich repeats and immunoglobulin-like domains 3                                      | BB524113  | 73.57   | 224.95  | 3.06 |
| 5930403N24Rik: RIKEN cDNA 5930403N24 gene                                                         | BB308657  | 62.76   | 191.79  | 3.06 |
| Fbxo7: F-box protein 7                                                                            | AK010499  | 206.41  | 631.92  | 3.06 |
| Slc7a2: solute carrier family 7 (cationic amino acid transporter, y+ system), member 2            | BF533509  | 53      | 161.45  | 3.05 |
| Add3: adducin 3 (gamma)                                                                           | BM239842  | 899.56  | 2748.13 | 3.05 |
| Wiz: Widely-interspaced zinc finger motifs                                                        | BG976607  | 167.96  | 512.56  | 3.05 |
| P140: P140 gene                                                                                   | BQ174549  | 96.83   | 295.77  | 3.05 |
| Edg3: endothelial differentiation, sphingolipid G-protein-coupled receptor, 3                     | BB532532  | 76.89   | 234.22  | 3.05 |
| Dbndd2: dysbindin (dystrobrevin binding protein 1) domain containing 2                            | BE949296  | 118.56  | 362.17  | 3.05 |
| Gab1: growth factor receptor bound protein 2-associated protein 1                                 | NM_021356 | 528.14  | 1605.5  | 3.04 |
| Add3: adducin 3 (gamma)                                                                           | BM239842  | 713.87  | 2173.61 | 3.04 |
| Pcdhb17: protocadherin beta 17                                                                    | NM_053142 | 226.78  | 688.65  | 3.04 |
| Mapk8ip2: mitogen-activated protein kinase 8 interacting protein 2                                | AF220195  | 148.09  | 450.08  | 3.04 |
| Brd1: bromodomain, testis-specific                                                                | NM_054054 | 77.67   | 236.01  | 3.04 |
| B3gal1: UDP-Gal:betaGlcNAc beta 1,3-galactosyltransferase, polypeptide 1                          | NM_020283 | 55.09   | 167.74  | 3.04 |
| Ebf4: early B-cell factor 4                                                                       | BB333883  | 52.67   | 159.93  | 3.04 |
| Socs3: suppressor of cytokine signaling 3                                                         | BB831725  | 58.71   | 177.64  | 3.03 |
| Neto1: neuropilin (NRP) and tolloid (TLL)-like 1                                                  | AV346211  | 197.57  | 599.32  | 3.03 |
| Arhgef10l: Rho guanine nucleotide exchange factor (GEF) 10-like                                   | AV238183  | 156.21  | 473.53  | 3.03 |
| Grik2: Glutamate receptor, ionotropic, kainate 2 (beta 2)                                         | BB075484  | 110.81  | 335.69  | 3.03 |
| Gdap1l1: ganglioside-induced differentiation-associated protein 1-like 1                          | BB733286  | 51.5    | 156.24  | 3.03 |
| Pld2: phospholipase D2                                                                            | NM_008876 | 225.7   | 682.74  | 3.02 |
| Car8 /// LOC676792: carbonic anhydrase 8 /// similar to Carbonic anhydrase-related protein (CARP) | X61397    | 890.14  | 2684.22 | 3.02 |
| AU041783: expressed sequence AU041783                                                             | BG068103  | 384.25  | 1161.99 | 3.02 |
| Pcdh9: protocadherin 9                                                                            | BB244656  | 756.04  | 2284.33 | 3.02 |
| Dgki: Diacylglycerol kinase, iota                                                                 | BB266350  | 75.31   | 227.35  | 3.02 |
| 1110065P19Rik /// 2310040A07Rik: RIKEN cDNA 1110065P19 gene /// RIKEN cDNA 2310040A07 g           | BB772205  | 253.52  | 765.63  | 3.02 |
| Jph3: junctophilin 3                                                                              | NM_020605 | 66.45   | 199.74  | 3.01 |

|                                                                                                                                     |           |         |         |      |
|-------------------------------------------------------------------------------------------------------------------------------------|-----------|---------|---------|------|
| Adhfe1: alcohol dehydrogenase, iron containing, 1                                                                                   | BC026584  | 223.35  | 672.72  | 3.01 |
| 5330439J01Rik: RIKEN cDNA 5330439J01 gene                                                                                           | BC027318  | 75.13   | 225.87  | 3.01 |
| Hras13: HRAS like suppressor 3                                                                                                      | BC024581  | 329.98  | 992.65  | 3.01 |
| March8: membrane-associated ring finger (C3HC4) 8                                                                                   | AK005032  | 1109.58 | 3337.51 | 3.01 |
| Dkk3: dickkopf homolog 3 (Xenopus laevis)                                                                                           | AK004853  | 132.94  | 399.37  | 3    |
| Jmy: junction-mediating and regulatory protein                                                                                      | BF227962  | 251.57  | 754.96  | 3    |
| Mm.194351.1                                                                                                                         | BQ174216  | 53.9    | 161.78  | 3    |
| Phldb1: pleckstrin homology-like domain, family B, member 1                                                                         | BC025856  | 489.78  | 1463.72 | 2.99 |
| Mm.2655.8                                                                                                                           | AK012373  | 63.24   | 189.27  | 2.99 |
| Abhd12: abhydrolase domain containing 12                                                                                            | BB178770  | 450.49  | 1345.39 | 2.99 |
| Asxl3: additional sex combs like 3 (Drosophila)                                                                                     | BB762904  | 77.31   | 231.47  | 2.99 |
| Tns3: tensin 3                                                                                                                      | BB499706  | 113.5   | 339.44  | 2.99 |
| 2900042E19Rik: RIKEN cDNA 2900042E19 gene                                                                                           | AK013639  | 53.26   | 158.74  | 2.98 |
| Mm.132272.1                                                                                                                         | BM238675  | 94.47   | 281.51  | 2.98 |
| Jam3: Junction adhesion molecule 3                                                                                                  | BG070615  | 100.92  | 300.48  | 2.98 |
| E130309F12Rik: RIKEN cDNA E130309F12 gene                                                                                           | AV320664  | 54.28   | 161.86  | 2.98 |
| Ralgs1: Ral GEF with PH domain and SH3 binding motif 1                                                                              | BM247829  | 221.25  | 658.14  | 2.97 |
| Tub: tubby candidate gene                                                                                                           | NM_021885 | 343.26  | 1016.54 | 2.96 |
| Adhfe1: alcohol dehydrogenase, iron containing, 1                                                                                   | BC026584  | 356.84  | 1057.69 | 2.96 |
| Mtm1: X-linked myotubular myopathy gene 1                                                                                           | BG976607  | 382.6   | 1132.57 | 2.96 |
| Pcyt1a: phosphate cytidyltransferase 1, choline, alpha isoform                                                                      | NM_009981 | 118.87  | 352.03  | 2.96 |
| Slc7a2: solute carrier family 7 (cationic amino acid transporter, y+ system), member 2                                              | AV244175  | 367.16  | 1088.19 | 2.96 |
| Id4: inhibitor of DNA binding 4                                                                                                     | BB121406  | 1265.28 | 3735    | 2.95 |
| Ipw: imprinted gene in the Prader-Willi syndrome region                                                                             | AK019361  | 81.42   | 240.09  | 2.95 |
| Sox8: SRY-box containing gene 8                                                                                                     | AV345303  | 689.98  | 2025.47 | 2.94 |
| Lrrn6c: leucine rich repeat neuronal 6C                                                                                             | BB125202  | 56.44   | 165.82  | 2.94 |
| Bcan: brevican                                                                                                                      | NM_007529 | 1229.69 | 3603.96 | 2.93 |
| Sema6a: sema domain, transmembrane domain (TM), and cytoplasmic domain, (semaphorin) 6A                                             | NM_018744 | 53.41   | 156.75  | 2.93 |
| Timp2: tissue inhibitor of metalloproteinase 2                                                                                      | M93954    | 123.57  | 362.06  | 2.93 |
| AB182283: cDNA sequence AB182283                                                                                                    | A1429738  | 89.49   | 261.87  | 2.93 |
| Gltp: glycolipid transfer protein                                                                                                   | BC016584  | 881.97  | 2578.29 | 2.92 |
| Gpr23: G protein-coupled receptor 23                                                                                                | AW493905  | 81.38   | 237.32  | 2.92 |
| Lrrtm1: leucine rich repeat transmembrane neuronal 1                                                                                | BB269910  | 82.39   | 240.35  | 2.92 |
| 5330421F07Rik: RIKEN cDNA 5330421F07 gene                                                                                           | AK019901  | 133.74  | 390.56  | 2.92 |
| Camk2d: calcium/calmodulin-dependent protein kinase II, delta                                                                       | AV346472  | 84.33   | 245.93  | 2.92 |
| Sorbs1: sorbin and SH3 domain containing 1                                                                                          | NM_009166 | 104.73  | 305.12  | 2.91 |
| Rbbp6: retinoblastoma binding protein 6                                                                                             | BC025874  | 215.72  | 628.41  | 2.91 |
| Dpyd: dihydropyrimidine dehydrogenase                                                                                               | BC028831  | 67.38   | 195.99  | 2.91 |
| Tmcc2: transmembrane and coiled-coil domains 2                                                                                      | AK004359  | 407.33  | 1184.12 | 2.91 |
| Stom: stomatin                                                                                                                      | AF093620  | 158.74  | 461.81  | 2.91 |
| Maf: avian musculoaponeurotic fibrosarcoma (v-maf) AS42 oncogene homolog                                                            | AV284857  | 417.67  | 1214.22 | 2.91 |
| Kif13a: Kinesin family member 13A                                                                                                   | BB040841  | 185.66  | 538.66  | 2.9  |
| Lmbrd1: LMBR1 domain containing 1                                                                                                   | AV370003  | 379.64  | 1099.13 | 2.9  |
| Ppp1r14c: protein phosphatase 1, regulatory (inhibitor) subunit 14c                                                                 | NM_133485 | 307.09  | 888.23  | 2.89 |
| Pkcz: protein kinase C, zeta                                                                                                        | NM_008860 | 107.43  | 309.95  | 2.89 |
| Hrsp12: heat-responsive protein 12                                                                                                  | AK005016  | 637.97  | 1842.4  | 2.89 |
| Syne1: synaptic nuclear envelope 1                                                                                                  | BI734306  | 131.58  | 380.32  | 2.89 |
| Gabrg1: gamma-aminobutyric acid (GABA-A) receptor, subunit gamma 1                                                                  | AF156490  | 400.42  | 1157.95 | 2.89 |
| 5730508B09Rik: RIKEN cDNA 5730508B09 gene                                                                                           | C80506    | 125.78  | 363.45  | 2.89 |
| LOC380843 /// Rbm24: similar to RNA binding motif protein 24 /// RNA binding motif protein 24                                       | AW125876  | 53.52   | 154.54  | 2.89 |
| Ntrk3: neurotrophic tyrosine kinase, receptor, type 3                                                                               | BE692701  | 79.87   | 230.34  | 2.88 |
| Pex19: peroxisome biogenesis factor 19                                                                                              | AV229364  | 102.34  | 294.41  | 2.88 |
| Pcsk1n: proprotein convertase subtilisin/kexin type 1 inhibitor                                                                     | AF181560  | 218.31  | 626.71  | 2.87 |
| Abat: 4-aminobutyrate aminotransferase                                                                                              | BF462185  | 641.32  | 1840.06 | 2.87 |
| Epb4.1: erythrocyte protein band 4.1                                                                                                | BB533969  | 121.32  | 347.63  | 2.87 |
| 5031439G07Rik: RIKEN cDNA 5031439G07 gene                                                                                           | BI408317  | 404.99  | 1161.58 | 2.87 |
| Transcribed locus                                                                                                                   | BB495006  | 54.54   | 156.78  | 2.87 |
| Gab1: growth factor receptor bound protein 2-associated protein 1                                                                   | NM_021356 | 607.28  | 1735.35 | 2.86 |
| Hist2h3c2: histone cluster 2, H3c2                                                                                                  | BC015270  | 55.14   | 157.61  | 2.86 |
| Epb4.1: erythrocyte protein band 4.1                                                                                                | BC017137  | 440.37  | 1258.42 | 2.86 |
| Gja1: gap junction membrane channel protein alpha 1                                                                                 | BB142324  | 2071.36 | 5916.08 | 2.86 |
| Skap2: src family associated phosphoprotein 2                                                                                       | BB753881  | 186.48  | 533.3   | 2.86 |
| Zbtb16: zinc finger and BTB domain containing 16                                                                                    | AA419994  | 83.11   | 236.89  | 2.85 |
| Strn: striatin, calmodulin binding protein                                                                                          | NM_011500 | 80.44   | 229.66  | 2.85 |
| Sv2a: synaptic vesicle glycoprotein 2 a                                                                                             | BC026494  | 160.76  | 457.86  | 2.85 |
| Fads2: fatty acid desaturase 2                                                                                                      | BB229957  | 342.97  | 976.74  | 2.85 |
| Mm.207272.1                                                                                                                         | BB090990  | 71.29   | 203.09  | 2.85 |
| 1200009O22Rik: RIKEN cDNA 1200009O22 gene                                                                                           | BC006619  | 77.56   | 220.1   | 2.84 |
| Urm1: ubiquitin related modifier 1 homolog (S. cerevisiae)                                                                          | AK012124  | 172.17  | 489.3   | 2.84 |
| Dlgap1: discs, large (Drosophila) homolog-associated protein 1                                                                      | BQ174338  | 170.07  | 483.73  | 2.84 |
| Zfx1b: zinc finger homeobox 1b                                                                                                      | BB244754  | 987.55  | 2801.14 | 2.84 |
| Hsd12: hydroxysteroid dehydrogenase like 2                                                                                          | BM200015  | 599.79  | 1698.76 | 2.83 |
| Sh3d19: SH3 domain protein D19                                                                                                      | NM_012059 | 614.68  | 1738.66 | 2.83 |
| Usp53: ubiquitin specific peptidase 53                                                                                              | BG076275  | 176.49  | 498.62  | 2.83 |
| Transcribed locus                                                                                                                   | BB560961  | 131.68  | 372.32  | 2.83 |
| Id4: Inhibitor of DNA binding 4                                                                                                     | AI323288  | 412.91  | 1164.42 | 2.82 |
| 2900042E01Rik: RIKEN cDNA 2900042E01 gene                                                                                           | AK013637  | 296.64  | 835.62  | 2.82 |
| AU022434: expressed sequence AU022434                                                                                               | BG068260  | 196.94  | 555.58  | 2.82 |
| Hipk2: homeodomain interacting protein kinase 2                                                                                     | BB554636  | 866.49  | 2441.6  | 2.82 |
| Malat1: metastasis associated lung adenocarcinoma transcript 1 (non-coding RNA)                                                     | AW012617  | 305.36  | 857.72  | 2.81 |
| Em1 /// LOC634102: echinoderm microtubule associated protein like 1 /// similar to echinoderm microtubule associated protein like 1 | AK003593  | 110.16  | 309.53  | 2.81 |
| 1110012J17Rik: RIKEN cDNA 1110012J17 gene                                                                                           | BB795266  | 111.28  | 312.34  | 2.81 |
| Atp8a1: ATPase, aminophospholipid transporter (APLT), class I, type 8A, member 1                                                    | AW610650  | 438.39  | 1231.87 | 2.81 |
| Nol4: nucleolar protein 4                                                                                                           | AV338483  | 170.11  | 478.76  | 2.81 |
| Aplp1: amyloid beta (A4) precursor-like protein 1                                                                                   | AI848048  | 765.18  | 2142.33 | 2.8  |
| Fbxo32: F-box protein 32                                                                                                            | AF441120  | 142.99  | 400.88  | 2.8  |
| Elmo1: engulfment and cell motility 1, ced-12 homolog (C. elegans)                                                                  | NM_080288 | 196.56  | 550.9   | 2.8  |
| Ppp1r14c: protein phosphatase 1, regulatory (inhibitor) subunit 14c                                                                 | AK013448  | 151.19  | 423.23  | 2.8  |
| Pfcb1: phospholipase C, beta 1                                                                                                      | BB794831  | 337.31  | 944.77  | 2.8  |

|                                                                                                 |           |         |         |      |
|-------------------------------------------------------------------------------------------------|-----------|---------|---------|------|
| Snrpn: Small nuclear ribonucleoprotein N                                                        | BB264453  | 66.1    | 184.79  | 2.8  |
| 2010111I01Rik: RIKEN cDNA 2010111I01 gene                                                       | AV341977  | 70.87   | 198.6   | 2.8  |
| F3: coagulation factor III                                                                      | BC024886  | 299.83  | 835.4   | 2.79 |
| Car8: carbonic anhydrase 8                                                                      | BC010773  | 121.57  | 339.35  | 2.79 |
| Tcf3: transcription factor 3                                                                    | BE994269  | 262.58  | 732.37  | 2.79 |
| Tef: thyrotroph embryonic factor                                                                | BB530740  | 69.7    | 194.3   | 2.79 |
| Aldh6a1: aldehyde dehydrogenase family 6, subfamily A1                                          | NM_134042 | 708.58  | 1973.76 | 2.79 |
| Cnksr3: Cnksr family member 3                                                                   | AV351864  | 638.81  | 1782.94 | 2.79 |
| D19Ert409e: DNA segment, Chr 19, ERATO Doi 409, expressed                                       | BG918834  | 297.63  | 830.34  | 2.79 |
| Ddhd1: DDHD domain containing 1                                                                 | BM226111  | 195.49  | 545.22  | 2.79 |
| AU041783: expressed sequence AU041783                                                           | BG068103  | 228.21  | 636.53  | 2.79 |
| Tcf7l2: transcription factor 7-like 2, T-cell specific, HMG-box                                 | BB175494  | 577.93  | 1604.85 | 2.78 |
| Grm3: glutamate receptor, metabotropic 3                                                        | AK002958  | 215.21  | 597.84  | 2.78 |
| 0610010D24Rik: RIKEN cDNA 0610010D24 gene                                                       | AK002458  | 88.76   | 247.16  | 2.78 |
| LOC676640: region containing RIKEN cDNA 9630020C08 gene; neuron navigator 3                     | AW537064  | 149.89  | 415.99  | 2.78 |
| B930095G15Rik: RIKEN cDNA B930095G15 gene                                                       | BB376007  | 130.08  | 361.87  | 2.78 |
| Asrgl1: asparaginase like 1                                                                     | AU040643  | 1192.81 | 3304.88 | 2.77 |
| Zrsr1: zinc finger (CCHC type), RNA binding motif and serine/arginine rich 1                    | NM_011663 | 231.22  | 639.82  | 2.77 |
| Fbxo44: F-box protein 44                                                                        | AV174662  | 303.51  | 839.53  | 2.77 |
| Gramd1c: GRAM domain containing 1C                                                              | AV255657  | 82.83   | 229.24  | 2.77 |
| 9830001H06Rik: RIKEN cDNA 9830001H06 gene                                                       | BB486539  | 261.35  | 723.38  | 2.77 |
| Atp8a1: ATPase, aminophospholipid transporter (APLT), class I, type 8A, member 1                | AW610650  | 384.38  | 1066.05 | 2.77 |
| Lgmn: legumain                                                                                  | NM_011175 | 501.12  | 1381.6  | 2.76 |
| Slc7a2: solute carrier family 7 (cationic amino acid transporter, y+ system), member 2          | BF533509  | 59.8    | 164.89  | 2.76 |
| Tmem28: transmembrane protein 28                                                                | AV016797  | 57.91   | 160.09  | 2.76 |
| Pcdhb16: protocadherin beta 16                                                                  | BB027682  | 75.71   | 208.73  | 2.76 |
| Shroom2 /// LOC670546: shroom family member 2 /// similar to Apical-like protein (APXL protein) | BM119167  | 257.91  | 711.52  | 2.76 |
| B230342M21Rik: RIKEN cDNA B230342M21 gene                                                       | NM_133898 | 117.21  | 322.19  | 2.75 |
| 2810021G02Rik: RIKEN cDNA 2810021G02 gene                                                       | AK012776  | 526.1   | 1444.91 | 2.75 |
| Acsl3: acyl-CoA synthetase long-chain family member 3                                           | AK012088  | 88.28   | 243.06  | 2.75 |
| Tbl1xr1: Transducin (beta)-like 1X-linked receptor 1                                            | BB667085  | 197.62  | 542.56  | 2.75 |
| Mm.184898.1                                                                                     | AI851474  | 114.92  | 315.63  | 2.75 |
| 2010003O18Rik: RIKEN cDNA 2010003O18 gene                                                       | AI452045  | 87.33   | 240.59  | 2.75 |
| Tagln3: transgelin 3                                                                            | NM_019754 | 251.34  | 687.45  | 2.74 |
| Pcp4: Purkinje cell protein 4                                                                   | NM_008791 | 92.46   | 253.36  | 2.74 |
| Ntrk3: Neurotrophic tyrosine kinase, receptor, type 3                                           | BM245880  | 232.19  | 635.3   | 2.74 |
| 5730410E15Rik: RIKEN cDNA 5730410E15 gene                                                       | BB298720  | 210.97  | 577.81  | 2.74 |
| Lmbrd1: LMBR1 domain containing 1                                                               | BM206793  | 340.52  | 931.05  | 2.73 |
| Tnfrsf19: tumor necrosis factor receptor superfamily, member 19                                 | NM_013869 | 211.46  | 576.97  | 2.73 |
| Gpr137b /// LOC664862 /// LOC673335: G protein-coupled receptor 137B /// similar to transmembr  | AK010724  | 199.96  | 545.98  | 2.73 |
| Etohi1 /// 6230416C02Rik /// LOC667962 /// LOC668009: ethanol induced 1 /// RIKEN cDNA 62304    | AK005093  | 437.61  | 1192.64 | 2.73 |
| 6030400A10Rik: RIKEN cDNA 6030400A10 gene                                                       | AK020045  | 116.28  | 317.34  | 2.73 |
| Endod1: endonuclease domain containing 1                                                        | BI734389  | 109.86  | 300.36  | 2.73 |
| Zfp608 /// D430007A19Rik: zinc finger protein 608 /// RIKEN cDNA D430007A19 gene                | AV222442  | 485.73  | 1327.51 | 2.73 |
| Magl2: Membrane associated guanylate kinase, WW and PDZ domain containing 2                     | BB337886  | 144.14  | 393.69  | 2.73 |
| Ga17: Dendritic cell protein GA17                                                               | BB525437  | 78.63   | 214.6   | 2.73 |
| Sox6: SRY-box containing gene 6                                                                 | BB257593  | 1095.78 | 2992.67 | 2.73 |
| AW125296: expressed sequence AW125296                                                           | BB304438  | 243     | 660.87  | 2.72 |
| AW493225: Expressed sequence AW493225                                                           | BB314596  | 66.2    | 179.77  | 2.72 |
| Arhgap23: Rho GTPase activating protein 23                                                      | BE988299  | 203.5   | 552.17  | 2.71 |
| Asrgl1: asparaginase like 1                                                                     | AU040643  | 938.6   | 2543.58 | 2.71 |
| Hsd12: hydroxysteroid dehydrogenase like 2                                                      | BM200015  | 672.83  | 1822.2  | 2.71 |
| Lrrn6a: leucine rich repeat neuronal 6A                                                         | BB078751  | 150.84  | 408.09  | 2.71 |
| Gpr137b /// LOC664862 /// LOC673335: G protein-coupled receptor 137B /// similar to transmembr  | AK009736  | 339.32  | 918.32  | 2.71 |
| Stom: stomatin                                                                                  | BB782444  | 441.25  | 1197.72 | 2.71 |
| Grf1: Glucocorticoid receptor DNA binding factor 1                                              | AW556148  | 88.38   | 239.68  | 2.71 |
| S100a13: S100 calcium binding protein A13                                                       | NM_009113 | 488.66  | 1320.84 | 2.7  |
| Stom: stomatin                                                                                  | AF093620  | 411.98  | 1111.83 | 2.7  |
| Cspg2: chondroitin sulfate proteoglycan 2                                                       | BM251152  | 893.57  | 2410.74 | 2.7  |
| Atp8a1: ATPase, aminophospholipid transporter (APLT), class I, type 8A, member 1                | BQ176779  | 399.06  | 1078.13 | 2.7  |
| Grf1: Glucocorticoid receptor DNA binding factor 1                                              | AW556947  | 217.27  | 586.65  | 2.7  |
| Smad7: MAD homolog 7 (Drosophila)                                                               | BB241324  | 144.08  | 389.23  | 2.7  |
| Txn14: thioredoxin-like 4                                                                       | NM_025299 | 65.39   | 176     | 2.69 |
| Ube2d3: ubiquitin-conjugating enzyme E2D 3 (UBC4/5 homolog, yeast)                              | AK009276  | 684.56  | 1840.64 | 2.69 |
| Id4: inhibitor of DNA binding 4                                                                 | BB121406  | 2093.89 | 5633.32 | 2.69 |
| Slc14a1: solute carrier family 14 (urea transporter), member 1                                  | AW556396  | 193.14  | 519.18  | 2.69 |
| Lnx1: ligand of numb-protein X 1                                                                | BB131619  | 189.17  | 509.06  | 2.69 |
| Mro: Maestro                                                                                    | BI076815  | 195     | 523.7   | 2.69 |
| Ntrk2: neurotrophic tyrosine kinase, receptor, type 2                                           | BQ174783  | 80.24   | 215.78  | 2.69 |
| Sept7: Septin 7                                                                                 | BB283891  | 77.29   | 207.57  | 2.69 |
| Eya1: eyes absent 1 homolog (Drosophila)                                                        | BB298032  | 67.7    | 182.36  | 2.69 |
| Ephb1: Eph receptor B1                                                                          | BQ176283  | 407.35  | 1094.79 | 2.69 |
| Usp20: ubiquitin specific peptidase 20                                                          | AK006800  | 212     | 568.94  | 2.68 |
| Gdpd3: glycerophosphodiester phosphodiesterase domain containing 3                              | NM_024228 | 150.7   | 403.14  | 2.68 |
| 2810402A17Rik: RIKEN cDNA 2810402A17 gene                                                       | AI448995  | 194.53  | 522.2   | 2.68 |
| Entpd5: ectonucleoside triphosphate diphosphohydrolase 5                                        | BB309883  | 212.95  | 570.17  | 2.68 |
| H2afy2: H2A histone family, member Y2                                                           | BB396393  | 95.67   | 256.31  | 2.68 |
| Transcribed locus                                                                               | BE687857  | 130.27  | 349.45  | 2.68 |
| 4930589M24Rik: RIKEN cDNA 4930589M24 gene                                                       | AK016375  | 119.21  | 318.96  | 2.68 |
| Fgf12: fibroblast growth factor 12                                                              | AF020738  | 112.37  | 300.39  | 2.67 |
| 4933439C20Rik: RIKEN cDNA 4933439C20 gene                                                       | AK007420  | 139.25  | 371.42  | 2.67 |
| D430039N05Rik: RIKEN cDNA D430039N05 gene                                                       | BM117463  | 404.87  | 1080.83 | 2.67 |
| Dock4: dedicator of cytokinesis 4                                                               | BG068753  | 311.23  | 831.05  | 2.67 |
| Transcribed locus                                                                               | BB340995  | 248.71  | 663.15  | 2.67 |
| Txnip: thioredoxin interacting protein                                                          | AF173681  | 706.29  | 1877.77 | 2.66 |
| Tmem47: Transmembrane protein 47                                                                | NM_138751 | 1377.61 | 3659.18 | 2.66 |
| Gja1: gap junction membrane channel protein alpha 1                                             | AV330726  | 2555.85 | 6791.56 | 2.66 |
| Mm.25251.1                                                                                      | AU067772  | 252.83  | 673.16  | 2.66 |
| Pcdh9: Protocadherin 9                                                                          | BB750203  | 408.93  | 1088.98 | 2.66 |

|                                                                                                   |           |         |         |      |
|---------------------------------------------------------------------------------------------------|-----------|---------|---------|------|
| Mtap1a: microtubule-associated protein 1 A                                                        | BB765000  | 192.05  | 511     | 2.66 |
| Atp8a1: ATPase, aminophospholipid transporter (APLT), class I, type 8A, member 1                  | BB303874  | 200.43  | 531.22  | 2.65 |
| Ppap2b: phosphatidic acid phosphatase type 2B                                                     | NM_080555 | 2072.5  | 5489.17 | 2.65 |
| Oprl1: opioid receptor-like 1                                                                     | X91813    | 82.96   | 219.72  | 2.65 |
| 8430427H17Rik: RIKEN cDNA 8430427H17 gene                                                         | AK018446  | 520.56  | 1381.06 | 2.65 |
| Eif2ak4: Eukaryotic translation initiation factor 2 alpha kinase 4                                | BM240005  | 74.55   | 197.56  | 2.65 |
| 5830407P18Rik: RIKEN cDNA 5830407P18 gene                                                         | AK017401  | 64.95   | 171.87  | 2.65 |
| Usp2: ubiquitin specific peptidase 2                                                              | AI553394  | 141.92  | 374.97  | 2.64 |
| Atp9a: ATPase, class II, type 9A                                                                  | AF011336  | 268.88  | 710.38  | 2.64 |
| Tspan9: tetraspanin 9                                                                             | AK020159  | 638.37  | 1686.61 | 2.64 |
| 4930402H24Rik: RIKEN cDNA 4930402H24 gene                                                         | BB667775  | 548.58  | 1449.9  | 2.64 |
| Nrxn2: neurexin II                                                                                | BE949064  | 367.53  | 970.6   | 2.64 |
| Rora: RAR-related orphan receptor alpha                                                           | BB306272  | 104.62  | 276.42  | 2.64 |
| Transcribed locus                                                                                 | BE953350  | 79.44   | 210.08  | 2.64 |
| Fads1: fatty acid desaturase 1                                                                    | BB277583  | 256.81  | 677.29  | 2.64 |
| Impact: imprinted and ancient                                                                     | BB524087  | 130.16  | 343.79  | 2.64 |
| Atp9a: ATPase, class II, type 9A                                                                  | NM_015731 | 311.96  | 819.48  | 2.63 |
| Tcf7l2: transcription factor 7-like 2, T-cell specific, HMG-box                                   | BB175494  | 632.49  | 1665.58 | 2.63 |
| Scamp5: secretory carrier membrane protein 5                                                      | BC018613  | 813.92  | 2140.45 | 2.63 |
| Asah1: N-acylphingosine amidohydrolase (acid ceramidase)-like                                     | BI106821  | 393.31  | 1034.74 | 2.63 |
| 3110057O12Rik: RIKEN cDNA 3110057O12 gene                                                         | AW061107  | 67.34   | 177.1   | 2.63 |
| Brsk2: BR serine/threonine kinase 2                                                               | AK014760  | 286.03  | 751.73  | 2.63 |
| Mm.37908.1                                                                                        | BB762627  | 61.86   | 162.4   | 2.63 |
| A930005H10Rik: RIKEN cDNA A930005H10 gene                                                         | BF318375  | 106.95  | 281.47  | 2.63 |
| Scn8a: Sodium channel, voltage-gated, type VIII, alpha                                            | BB461850  | 95.9    | 251.9   | 2.63 |
| Col16a1: procollagen, type XVI, alpha 1                                                           | BB766878  | 365.28  | 956.3   | 2.62 |
| Abcc5: ATP-binding cassette, sub-family C (CFTR/MRP), member 5                                    | AV150520  | 369.44  | 967.95  | 2.62 |
| Fkbp15: FK506 binding protein 15                                                                  | BG094421  | 255.16  | 668.05  | 2.62 |
| Ttc9b: tetratricopeptide repeat domain 9B                                                         | AK013779  | 83.67   | 219.36  | 2.62 |
| Mm.153994.1                                                                                       | BM934468  | 157.16  | 412.45  | 2.62 |
| Sox21: SRY-box containing gene 21                                                                 | BB046776  | 666.15  | 1745.28 | 2.62 |
| Mm.212452.1                                                                                       | BB710847  | 105.61  | 276.94  | 2.62 |
| 0610040B10Rik: RIKEN cDNA 0610040B10 gene                                                         | BE198048  | 82.73   | 216.7   | 2.62 |
| Ehd3: EH-domain containing 3                                                                      | BM234719  | 157.36  | 411.34  | 2.61 |
| Malat1: Metastasis associated lung adenocarcinoma transcript 1 (non-coding RNA)                   | AF146523  | 3707.02 | 9668.97 | 2.61 |
| Sycp3: Synaptonemal complex protein 3                                                             | BM899344  | 331.2   | 865.77  | 2.61 |
| Gpr137b /// LOC664862: G protein-coupled receptor 137B /// similar to transmembrane 7 superfam    | BB726971  | 550.76  | 1435.56 | 2.61 |
| Timp2: tissue inhibitor of metalloproteinase 2                                                    | M93954    | 305.23  | 797.85  | 2.61 |
| Arrb1: arrestin, beta 1                                                                           | AK004614  | 130.34  | 340.35  | 2.61 |
| 9330182L06Rik: RIKEN cDNA 9330182L06 gene                                                         | AU067633  | 201.91  | 527.59  | 2.61 |
| Rps6ka2: ribosomal protein S6 kinase, polypeptide 2                                               | BB737182  | 92.26   | 239.96  | 2.6  |
| Igfb4: immunoglobulin superfamily, member 4A                                                      | AK013775  | 331.25  | 860.32  | 2.6  |
| Cpeb2: cytoplasmic polyadenylation element binding protein 2                                      | AV231491  | 631.34  | 1642.34 | 2.6  |
| Mmp16: matrix metalloproteinase 16                                                                | BB041237  | 110.55  | 287.65  | 2.6  |
| Cyld: cylindromatosis (turban tumor syndrome)                                                     | AK013508  | 133.73  | 347.79  | 2.6  |
| Rnf144: ring finger protein 144                                                                   | BB125272  | 807.13  | 2096.46 | 2.6  |
| Zfp608 /// D430007A19Rik: zinc finger protein 608 /// RIKEN cDNA D430007A19 gene                  | AV274175  | 241.1   | 625.65  | 2.6  |
| Pkca: Protein kinase C, alpha                                                                     | BB114415  | 74.78   | 194.31  | 2.6  |
| Camsap1l1: calmodulin regulated spectrin-associated protein 1-like 1                              | BB528893  | 69.42   | 180.61  | 2.6  |
| Hdlbp: high density lipoprotein (HDL) binding protein                                             | C77256    | 212.46  | 550.87  | 2.59 |
| Axl: AXL receptor tyrosine kinase                                                                 | AA500897  | 222.34  | 576.76  | 2.59 |
| Atp8a1: ATPase, aminophospholipid transporter (APLT), class I, type 8A, member 1                  | BB303874  | 349.43  | 904.02  | 2.59 |
| 3100002L24Rik /// LOC627901 /// 0610010B08Rik /// LOC628084 /// LOC628147 /// LOC668030           | BB283527  | 1128.14 | 2916.43 | 2.59 |
| 2310040A07Rik: RIKEN cDNA 2310040A07 gene                                                         | BB772205  | 451.96  | 1168.97 | 2.59 |
| 4930589M24Rik: RIKEN cDNA 4930589M24 gene                                                         | AK014044  | 262.56  | 680.22  | 2.59 |
| Fchsd2: FCH and double SH3 domains 2                                                              | BB461848  | 969.88  | 2511.33 | 2.59 |
| A1839402: expressed sequence A1839402                                                             | AI839402  | 130.65  | 338.11  | 2.59 |
| Il6st: interleukin 6 signal transducer                                                            | BI102913  | 335.63  | 868.58  | 2.59 |
| Lrrn6a: leucine rich repeat neuronal 6A                                                           | BQ176787  | 86.82   | 225.28  | 2.59 |
| Rtn4: Reticulon 4                                                                                 | BB206454  | 359.64  | 931.74  | 2.59 |
| Mmp16: matrix metalloproteinase 16                                                                | BB431535  | 84.71   | 219.42  | 2.59 |
| D7Ert715e: DNA segment, Chr 7, ERATO Doi 715, expressed                                           | BB077252  | 84.23   | 217.87  | 2.59 |
| Gpr137b /// LOC664862: G protein-coupled receptor 137B /// similar to transmembrane 7 superfam    | BB726971  | 695.21  | 1793.59 | 2.58 |
| Glud1: glutamate dehydrogenase 1                                                                  | NM_008133 | 1881.51 | 4857.15 | 2.58 |
| Pde9a: phosphodiesterase 9A                                                                       | NM_008804 | 657.54  | 1695.9  | 2.58 |
| Cyld: cylindromatosis (turban tumor syndrome)                                                     | BM119209  | 112.6   | 290.56  | 2.58 |
| Mm.160342.1                                                                                       | BM209124  | 173.43  | 447.5   | 2.58 |
| Mxd1: MAX dimerization protein 1                                                                  | AV228517  | 124.32  | 321.35  | 2.58 |
| 2610110G12Rik: RIKEN cDNA 2610110G12 gene                                                         | AK014265  | 486.47  | 1253.15 | 2.58 |
| Cadps: Ca<2+>-dependent activator protein for secretion                                           | AI462674  | 78.65   | 202.84  | 2.58 |
| Mm.41368.1                                                                                        | AF096898  | 224.33  | 578.11  | 2.58 |
| Igfb4: immunoglobulin superfamily, member 4A                                                      | NM_018770 | 797.63  | 2049.4  | 2.57 |
| Fads2: fatty acid desaturase 2                                                                    | NM_019699 | 1540.46 | 3962.82 | 2.57 |
| Myo6: myosin VI                                                                                   | NM_008662 | 416.79  | 1073.09 | 2.57 |
| Gja1: gap junction membrane channel protein alpha 1                                               | BB043407  | 2028.46 | 5205.04 | 2.57 |
| 3100002L24Rik /// 9230108I15Rik /// LOC626832 /// 0610010B08Rik /// LOC628147 /// LOC66504        | BB120894  | 184.49  | 474.07  | 2.57 |
| Adult male olfactory brain cDNA, RIKEN full-length enriched library, clone:6430514A06 product:unc | AV340255  | 161.97  | 415.85  | 2.57 |
| BB045044: expressed sequence BB045044                                                             | BB045044  | 97.11   | 249.4   | 2.57 |
| D630045J12Rik: RIKEN cDNA D630045J12 gene                                                         | BB503889  | 312.71  | 803.44  | 2.57 |
| Lrrtm2: leucine rich repeat transmembrane neuronal 2                                              | BB281991  | 234.25  | 601.05  | 2.57 |
| Dynl12: dynein light chain LC8-type 2                                                             | NM_133796 | 1614.05 | 4137.15 | 2.56 |
| Tsr2: TSR2, 20S rRNA accumulation, homolog (S. cerevisiae)                                        | BQ177187  | 208.36  | 534.07  | 2.56 |
| Abcc5: ATP-binding cassette, sub-family C (CFTR/MRP), member 5                                    | AV150520  | 507.07  | 1299.06 | 2.56 |
| Ncald: Neurocalcin delta                                                                          | BB433324  | 253.52  | 648.35  | 2.56 |
| Gja1: gap junction membrane channel protein alpha 1                                               | M63801    | 3207.73 | 8187.03 | 2.55 |
| Pcdcd4 /// LOC670861: programmed cell death 4 /// similar to programmed cell death 4              | NM_011050 | 1056.3  | 2688.61 | 2.55 |
| Cspg5: chondroitin sulfate proteoglycan 5                                                         | NM_013884 | 729.41  | 1860.47 | 2.55 |
| Polr3f: polymerase (RNA) III (DNA directed) polypeptide F                                         | AK014110  | 65.28   | 166.61  | 2.55 |
| Zfp365: zinc finger protein 365                                                                   | BB277790  | 178.87  | 455.78  | 2.55 |

|                                                                                                     |           |         |         |      |
|-----------------------------------------------------------------------------------------------------|-----------|---------|---------|------|
| Mm.205708.1                                                                                         | BE949437  | 166.85  | 425.73  | 2.55 |
| Phactr1: phosphatase and actin regulator 1                                                          | BG228702  | 159.42  | 407.27  | 2.55 |
| Elf1: E74-like factor 1                                                                             | NM_007920 | 159.51  | 405.52  | 2.54 |
| Slc6a9: solute carrier family 6 (neurotransmitter transporter, glycine), member 9                   | NM_008135 | 347.93  | 884.24  | 2.54 |
| Dynll2: dynein light chain LC8-type 2                                                               | AY029255  | 1001.76 | 2544.9  | 2.54 |
| Them4: thioesterase superfamily member 4                                                            | BC022612  | 139.2   | 353.28  | 2.54 |
| 2210409B22Rik: RIKEN cDNA 2210409B22 gene                                                           | BM207133  | 915.71  | 2321.61 | 2.54 |
| C130076007Rik: RIKEN cDNA C130076007 gene                                                           | BB064688  | 257.29  | 652.5   | 2.54 |
| Bfsp2: beaded filament structural protein 2, phakinin                                               | BB753392  | 82.21   | 209.01  | 2.54 |
| Dusp15: Dual specificity phosphatase-like 15                                                        | BB174864  | 164.49  | 418.11  | 2.54 |
| 2900022I03Rik: RIKEN cDNA 2900022I03 gene                                                           | BQ175321  | 329.06  | 837.31  | 2.54 |
| AA388235: expressed sequence AA388235                                                               | AV347825  | 75.1    | 190.66  | 2.54 |
| Tbl1x: Transducin (beta)-like 1 X-linked                                                            | BG075809  | 183.88  | 467.84  | 2.54 |
| Gpm6a: Glycoprotein m6a                                                                             | BB481606  | 99.73   | 253.16  | 2.54 |
| Hist1h1c: histone cluster 1, H1c                                                                    | NM_015786 | 1273.38 | 3226.83 | 2.53 |
| Tspan15 /// LOC669875: tetraspanin 15 /// similar to Tetraspanin-15 (Tspan-15) (Transmembrane 4     | BC003872  | 485.79  | 1228.04 | 2.53 |
| Wipf1: WAS/WASL interacting protein family, member 1                                                | C76969    | 278.58  | 704.13  | 2.53 |
| H13: histocompatibility 13                                                                          | BQ175993  | 77.15   | 195.19  | 2.53 |
| Gfap: glial fibrillary acidic protein                                                               | BB750040  | 837.18  | 2120.3  | 2.53 |
| Klhl5: Kelch-like 5 (Drosophila)                                                                    | AI785329  | 112.24  | 284.1   | 2.53 |
| BC002059: CDNA sequence BC002059                                                                    | BB210733  | 87.55   | 221.23  | 2.53 |
| Transcribed locus                                                                                   | BI737243  | 108.85  | 275.69  | 2.53 |
| Snag1: sorting nexin associated golgi protein 1                                                     | AV344473  | 1265.22 | 3188.44 | 2.52 |
| Scg3: secretogranin III                                                                             | NM_009130 | 849.57  | 2139.8  | 2.52 |
| 2810410L24Rik: RIKEN cDNA 2810410L24 gene                                                           | BB493215  | 349.68  | 880.84  | 2.52 |
| E030049G20Rik: RIKEN cDNA E030049G20 gene                                                           | BB536333  | 330.86  | 834.48  | 2.52 |
| Camsap11: calmodulin regulated spectrin-associated protein 1-like 1                                 | AK005444  | 935.59  | 2356.68 | 2.52 |
| Caskin1: CASK interacting protein 1                                                                 | BB371845  | 84.79   | 213.64  | 2.52 |
| AA536749: expressed sequence AA536749                                                               | BB365879  | 247.67  | 623.01  | 2.52 |
| Ap1s2: adaptor-related protein complex 1, sigma 2 subunit                                           | BE655707  | 270.18  | 681.3   | 2.52 |
| Glud1: glutamate dehydrogenase 1                                                                    | NM_008133 | 2098.54 | 5275.48 | 2.51 |
| Gpam: glycerol-3-phosphate acyltransferase, mitochondrial                                           | NM_008149 | 1520.68 | 3815.41 | 2.51 |
| Ppap2c: phosphatidic acid phosphatase type 2c                                                       | NM_015817 | 102.75  | 258.03  | 2.51 |
| Trim24: tripartite motif protein 24                                                                 | BB325847  | 67.03   | 168.53  | 2.51 |
| Abtb1: ankyrin repeat and BTB (POZ) domain containing 1                                             | NM_030251 | 71.8    | 179.53  | 2.5  |
| Igfs4a: immunoglobulin superfamily, member 4A                                                       | NM_018770 | 1017.32 | 2545.66 | 2.5  |
| Bace1: beta-site APP cleaving enzyme 1                                                              | AF200346  | 310.33  | 775.02  | 2.5  |
| C1qtnf5 /// Mfrp: C1q and tumor necrosis factor related protein 5 /// membrane-type frizzled-relate | BC023068  | 113.78  | 284.98  | 2.5  |
| Fads2: fatty acid desaturase 2                                                                      | NM_019699 | 1767.93 | 4423.98 | 2.5  |
| 0710001D07Rik: RIKEN cDNA 0710001D07 gene                                                           | AK002941  | 90      | 224.95  | 2.5  |
| 1500035N22Rik: RIKEN cDNA 1500035N22 gene                                                           | AK005363  | 91.63   | 228.95  | 2.5  |
| B930006L02Rik: RIKEN cDNA B930006L02 gene                                                           | BB699417  | 601.89  | 1506.06 | 2.5  |
| Gpr23: G protein-coupled receptor 23                                                                | BB417145  | 161.49  | 403.39  | 2.5  |
| 6330439K17Rik: RIKEN cDNA 6330439K17 gene                                                           | AV328193  | 127.48  | 318.09  | 2.5  |
| AU015680: expressed sequence AU015680                                                               | BB131588  | 132.73  | 331.48  | 2.5  |
| Vcam1: vascular cell adhesion molecule 1                                                            | BB250384  | 521.07  | 1297.3  | 2.49 |
| Glrb: glycine receptor, beta subunit                                                                | NM_010298 | 403.24  | 1004.84 | 2.49 |
| Rims2: regulating synaptic membrane exocytosis 2                                                    | NM_053271 | 175.01  | 435.58  | 2.49 |
| Parp3: poly (ADP-ribose) polymerase family, member 3                                                | BC014870  | 72.6    | 181.13  | 2.49 |
| Tln2 /// LOC639214: talin 2 /// similar to talin 2                                                  | AV270892  | 96.78   | 240.5   | 2.49 |
| 2810410L24Rik: RIKEN cDNA 2810410L24 gene                                                           | AK013071  | 198.26  | 494.19  | 2.49 |
| Itpkc: inositol 1,4,5-trisphosphate 3-kinase C                                                      | BB529013  | 75.25   | 187.55  | 2.49 |
| EG619719: predicted gene, EG619719                                                                  | AV347067  | 82.83   | 205.94  | 2.49 |
| Pcdhb11: Protocadherin beta 11                                                                      | BB481932  | 73.87   | 184.07  | 2.49 |
| 2310005P05Rik: RIKEN cDNA 2310005P05 gene                                                           | NM_026189 | 142.47  | 353.32  | 2.48 |
| Gabbr1 /// B230208N19Rik: gamma-aminobutyric acid (GABA-A) receptor, subunit beta 1 /// RIKEN       | NM_008069 | 136.98  | 339.65  | 2.48 |
| Rap2a: RAS related protein 2a                                                                       | NM_029519 | 81.33   | 201.64  | 2.48 |
| Endod1: endonuclease domain containing 1                                                            | BF168366  | 84.02   | 208.26  | 2.48 |
| AW456874: expressed sequence AW456874                                                               | BB275142  | 154.86  | 383.82  | 2.48 |
| Hist2h2aa2: histone cluster 2, H2aa2                                                                | BB360457  | 124.07  | 307.15  | 2.48 |
| Mmp16: Matrix metalloproteinase 16                                                                  | BB378819  | 115.71  | 287.36  | 2.48 |
| Fgf12: fibroblast growth factor 12                                                                  | BQ175704  | 89.3    | 221.8   | 2.48 |
| Maml2: Mastermind like 2 (Drosophila)                                                               | BB469236  | 195.42  | 484.03  | 2.48 |
| A130038J17Rik: RIKEN cDNA A130038J17 gene                                                           | BB157945  | 84.13   | 208.44  | 2.48 |
| Zkscan1: zinc finger with KRAB and SCAN domains 1                                                   | AI509716  | 122.29  | 303.5   | 2.48 |
| Ctnnd2: catenin (cadherin associated protein), delta 2                                              | BB431091  | 685.87  | 1698.85 | 2.48 |
| Rtkn: rhotekin                                                                                      | BC013820  | 349.51  | 863.21  | 2.47 |
| Prei4: preimplantation protein 4                                                                    | AV291259  | 783.87  | 1937.45 | 2.47 |
| Tnk2: tyrosine kinase, non-receptor, 2                                                              | NM_016788 | 166.47  | 410.96  | 2.47 |
| Cml3: camello-like 3                                                                                | BB019121  | 104.03  | 256.97  | 2.47 |
| Hist3h2a: histone cluster 3, H2a                                                                    | AI848909  | 193.35  | 476.67  | 2.47 |
| Rab32: RAB32, member RAS oncogene family                                                            | NM_026405 | 103     | 253.02  | 2.46 |
| Apbb1: amyloid beta (A4) precursor protein-binding, family B, member 1                              | AF206720  | 302.99  | 744.58  | 2.46 |
| Dnm3: dynamin 3                                                                                     | BC024584  | 297.7   | 732.66  | 2.46 |
| Id2: inhibitor of DNA binding 2                                                                     | BF019883  | 2234.01 | 5484.76 | 2.46 |
| Sec23ip: Sec23 interacting protein                                                                  | BE685845  | 432.97  | 1064.88 | 2.46 |
| AW456874: expressed sequence AW456874                                                               | AV254040  | 215.17  | 528.71  | 2.46 |
| Chrna4: cholinergic receptor, nicotinic, alpha polypeptide 4                                        | BB557207  | 216.48  | 531.53  | 2.46 |
| Parp8: poly (ADP-ribose) polymerase family, member 8                                                | BC022679  | 118.96  | 290.9   | 2.45 |
| Lrch3: leucine-rich repeats and calponin homology (CH) domain containing 3                          | BB763476  | 971.55  | 2377.76 | 2.45 |
| Pcmt2: Protein-L-isoaspartate (D-aspartate) O-methyltransferase domain containing 2                 | BG261527  | 94.22   | 230.55  | 2.45 |
| Cpeb2: cytoplasmic polyadenylation element binding protein 2                                        | BM935843  | 231.22  | 565.6   | 2.45 |
| Csf2ra: colony stimulating factor 2 receptor, alpha, low-affinity (granulocyte-macrophage)          | BM941868  | 77.69   | 189.22  | 2.44 |
| Zfp503: zinc finger protein 503                                                                     | BB447914  | 236.08  | 576.29  | 2.44 |
| S100a4: S100 calcium binding protein A4                                                             | D00208    | 405.25  | 990.67  | 2.44 |
| Gja1: gap junction membrane channel protein alpha 1                                                 | BB039269  | 3758.34 | 9172.99 | 2.44 |
| Igfs4b: immunoglobulin superfamily, member 4B                                                       | AY059393  | 208.17  | 507.35  | 2.44 |
| 6620401M08Rik: RIKEN cDNA 6620401M08 gene                                                           | BF011349  | 242.62  | 592.61  | 2.44 |
| AW456874: expressed sequence AW456874                                                               | AV254040  | 202.65  | 495.3   | 2.44 |

|                                                                                                    |           |         |         |      |
|----------------------------------------------------------------------------------------------------|-----------|---------|---------|------|
| Eps8: Epidermal growth factor receptor pathway substrate 8                                         | BM213788  | 92.07   | 224.9   | 2.44 |
| Dgkb: diacylglycerol kinase, beta                                                                  | BB279524  | 152.32  | 372.08  | 2.44 |
| Prdx6: peroxiredoxin 6                                                                             | BB796358  | 2265.48 | 5509.15 | 2.43 |
| 2700079J08Rik: RIKEN cDNA 2700079J08 gene                                                          | AA798895  | 760.89  | 1852.73 | 2.43 |
| Cpeb3: cytoplasmic polyadenylation element binding protein 3                                       | BB249892  | 115.58  | 280.94  | 2.43 |
| Itih3: inter-alpha trypsin inhibitor, heavy chain 3                                                | NM_008407 | 176.26  | 428.76  | 2.43 |
| Scamp5: secretory carrier membrane protein 5                                                       | NM_020270 | 165     | 401.01  | 2.43 |
| Vcam1: vascular cell adhesion molecule 1                                                           | L08431    | 186.25  | 452.4   | 2.43 |
| 2310002J21Rik: RIKEN cDNA 2310002J21 gene                                                          | A1642124  | 1377.1  | 3343.38 | 2.43 |
| Accn2: amiloride-sensitive cation channel 2, neuronal                                              | BQ176072  | 121.53  | 295.75  | 2.43 |
| Camk2d: calcium/calmodulin-dependent protein kinase II, delta                                      | BG074866  | 82.12   | 199.93  | 2.43 |
| Abhd4: abhydrolase domain containing 4                                                             | NM_134076 | 1344.63 | 3258.61 | 2.42 |
| Lxn: latexin                                                                                       | NM_016753 | 2462.61 | 5947.98 | 2.42 |
| Paps2: 3'-phosphoadenosine 5'-phosphosulfate synthase 2                                            | BF786072  | 95.77   | 232     | 2.42 |
| Sorbs1: sorbin and SH3 domain containing 1                                                         | BB737680  | 1253.43 | 3036.13 | 2.42 |
| Adcyap1r1: adenylate cyclase activating polypeptide 1 receptor 1                                   | BB427884  | 365.3   | 883.88  | 2.42 |
| Arhgef10: Rho guanine nucleotide exchange factor (GEF) 10                                          | AV345051  | 101.72  | 246.51  | 2.42 |
| 1110051B16Rik: RIKEN cDNA 1110051B16 gene                                                          | AK004227  | 161.78  | 392.3   | 2.42 |
| Tom1l2: target of myb1-like 2 (chicken)                                                            | BG072270  | 588.41  | 1424.05 | 2.42 |
| Btb9: BTB (POZ) domain containing 9                                                                | BQ175196  | 232.99  | 563.93  | 2.42 |
| Ptprt: protein tyrosine phosphatase, receptor type, T                                              | BB384963  | 291.87  | 707.47  | 2.42 |
| Transcribed locus                                                                                  | BM933678  | 98.17   | 237.99  | 2.42 |
| Gipc1: GIPC PDZ domain containing family, member 1                                                 | NM_018771 | 586.95  | 1415.27 | 2.41 |
| Klf15: Kruppel-like factor 15                                                                      | BC013486  | 454.25  | 1094.59 | 2.41 |
| Lrrtm2: leucine rich repeat transmembrane neuronal 2                                               | BB333692  | 97.65   | 234.89  | 2.41 |
| Bbs1: Bardet-Biedl syndrome 1 homolog (human)                                                      | BB121315  | 162.98  | 393.18  | 2.41 |
| 0 day neonate cerebellum cDNA, RIKEN full-length enriched library, clone:C230071G16 product:uncl   | AK014466  | 76.25   | 184.09  | 2.41 |
| Rdh5: retinol dehydrogenase 5                                                                      | NM_134006 | 305.23  | 733.59  | 2.4  |
| Tspan7: tetraspanin 7                                                                              | AF052492  | 1751.05 | 4201.75 | 2.4  |
| Cpeb4: cytoplasmic polyadenylation element binding protein 4                                       | NM_026252 | 89.64   | 215.36  | 2.4  |
| Lrrc4: leucine rich repeat containing 4                                                            | BB332932  | 133.97  | 321.58  | 2.4  |
| E330018D03Rik: RIKEN cDNA E330018D03 gene                                                          | BB555250  | 172.12  | 413.85  | 2.4  |
| Nlgn1: neuroligin 1                                                                                | BB702951  | 204.9   | 490.82  | 2.4  |
| Tspsy4: TSPY-like 4                                                                                | BC017540  | 992.26  | 2372.23 | 2.39 |
| Prss23: protease, serine, 23                                                                       | AK009847  | 323.71  | 772.94  | 2.39 |
| Tnk2 /// LOC672286: tyrosine kinase, non-receptor, 2 /// similar to Activated CDC42 kinase 1 (ACK- | NM_016788 | 692.04  | 1656.25 | 2.39 |
| Pdk2: pyruvate dehydrogenase kinase, isoenzyme 2                                                   | NM_133667 | 105.12  | 250.96  | 2.39 |
| Adcyap1r1: adenylate cyclase activating polypeptide 1 receptor 1                                   | AK013587  | 1462.22 | 3500.97 | 2.39 |
| Slc35d1: Solute carrier family 35 (UDP-glucuronic acid/UDP-N-acetylgalactosamine dual transporter) | A1642520  | 128.49  | 307.33  | 2.39 |
| Jmjd1c: jumonji domain containing 1C                                                               | B1155864  | 258.04  | 616.21  | 2.39 |
| Nlgn3: neuroligin 3                                                                                | BB308872  | 101.23  | 242.33  | 2.39 |
| Amy2: Amylase 2, pancreatic                                                                        | BB667309  | 169.31  | 404.84  | 2.39 |
| Glrb: glycine receptor, beta subunit                                                               | BB345174  | 724.49  | 1729.35 | 2.39 |
| Snta1: syntrophin, acidic 1                                                                        | NM_009228 | 205.07  | 489.06  | 2.38 |
| Tprkb: Tp53rk binding protein                                                                      | BC027162  | 1127.94 | 2685    | 2.38 |
| BC011467: cDNA sequence BC011467                                                                   | BC025823  | 150.04  | 357.56  | 2.38 |
| Kif13a: kinesin family member 13A                                                                  | AB037923  | 182.57  | 433.93  | 2.38 |
| D14Ert449e: DNA segment, Chr 14, ERATO Doi 449, expressed                                          | BG072279  | 320.43  | 762.35  | 2.38 |
| Adult male cecum cDNA, RIKEN full-length enriched library, clone:9130204C03 product:unclassified   | BF466929  | 158.38  | 376.27  | 2.38 |
| Gm237: gene model 237, (NCBI)                                                                      | BB667109  | 978.85  | 2333.71 | 2.38 |
| Sema6a: sema domain, transmembrane domain (TM), and cytoplasmic domain, (semaphorin) 6A            | A1606937  | 525.29  | 1250.74 | 2.38 |
| Pcdh17: protocadherin 17                                                                           | BQ176938  | 220.3   | 524.55  | 2.38 |
| Camk2d: calcium/calmodulin-dependent protein kinase II, delta                                      | BB373572  | 115.19  | 274.51  | 2.38 |
| Adult male medulla oblongata cDNA, RIKEN full-length enriched library, clone:6330531L09 product:u  | AV332226  | 148.69  | 353.93  | 2.38 |
| Akap13: A kinase (PRKA) anchor protein 13                                                          | AW045983  | 104.84  | 249.93  | 2.38 |
| Adam23: a disintegrin and metallopeptidase domain 23                                               | AV350138  | 139.53  | 331.59  | 2.38 |
| Strn: striatin, calmodulin binding protein                                                         | BG070684  | 860.21  | 2044.71 | 2.38 |
| Ntrk3: neurotrophic tyrosine kinase, receptor, type 3                                              | NM_008746 | 142.75  | 337.62  | 2.37 |
| Tprkb: Tp53rk binding protein                                                                      | BC024858  | 477.29  | 1130.86 | 2.37 |
| Id1: inhibitor of DNA binding 1                                                                    | U43884    | 778.16  | 1843.12 | 2.37 |
| Senp6: SUMO/sentrin specific peptidase 6                                                           | BG066990  | 95.93   | 227.35  | 2.37 |
| Cdc37l1: cell division cycle 37 homolog (S. cerevisiae)-like 1                                     | BE824561  | 717.77  | 1697.89 | 2.37 |
| Lrrn3: leucine rich repeat protein 3, neuronal                                                     | AI852420  | 417.39  | 991.14  | 2.37 |
| 2310028011Rik: RIKEN cDNA 2310028011 gene                                                          | AV290535  | 199.68  | 474.12  | 2.37 |
| Mm.35625.1                                                                                         | BF730541  | 420.58  | 997.68  | 2.37 |
| Rab39b: RAB39B, member RAS oncogene family                                                         | AK020665  | 209.41  | 497.25  | 2.37 |
| Pacs2: phosphofurin acidic cluster sorting protein 2                                               | BI412345  | 577.1   | 1359.9  | 2.36 |
| Vps13b /// LOC666173 /// LOC669978: vacuolar protein sorting 13B (yeast) /// similar to vacuolar p | AW109785  | 371.01  | 874.33  | 2.36 |
| Vps33a: vacuolar protein sorting 33A (yeast)                                                       | BF467999  | 131.92  | 311.32  | 2.36 |
| Acss1: acyl-CoA synthetase short-chain family member 1                                             | NM_080575 | 586.32  | 1375.94 | 2.35 |
| Islr: immunoglobulin superfamily containing leucine-rich repeat                                    | NM_012043 | 230.32  | 542.24  | 2.35 |
| Wasf1: WASP family 1                                                                               | NM_031877 | 1764.68 | 4142.57 | 2.35 |
| Paqr4: progesterin and adipoQ receptor family member IV                                            | BB279185  | 295.44  | 692.94  | 2.35 |
| Hist1h1c: histone cluster 1, H1c                                                                   | AW741575  | 135.58  | 318.5   | 2.35 |
| Wdr20a: WD repeat domain 20a                                                                       | NM_027149 | 327.4   | 769.36  | 2.35 |
| 1700128E19Rik: RIKEN cDNA 1700128E19 gene                                                          | AK007309  | 96.97   | 227.45  | 2.35 |
| Mm.121905.1                                                                                        | BB189640  | 693.05  | 1630.18 | 2.35 |
| Aut2: Autism susceptibility candidate 2                                                            | BB051515  | 93.98   | 220.66  | 2.35 |
| Prkca: Protein kinase C, alpha                                                                     | BB162460  | 152.67  | 358.07  | 2.35 |
| Ube2e2: Ubiquitin-conjugating enzyme E2E 2 (UBC4/5 homolog, yeast)                                 | BE981615  | 84.57   | 198.46  | 2.35 |
| 2610035D17Rik: RIKEN cDNA 2610035D17 gene                                                          | BB760848  | 142.49  | 335.41  | 2.35 |
| Trio: Triple functional domain (TPRF interacting)                                                  | AW553130  | 76.14   | 178.59  | 2.35 |
| 5730420B22Rik: RIKEN cDNA 5730420B22 gene                                                          | BC027108  | 560.53  | 1313.29 | 2.34 |
| Atg7: autophagy-related 7 (yeast)                                                                  | AW549826  | 99.59   | 233.31  | 2.34 |
| Ecel1: endothelin converting enzyme 1                                                              | AW553715  | 76.96   | 180.18  | 2.34 |
| Ptplb: protein tyrosine phosphatase-like (proline instead of catalytic arginine), member b         | BG067863  | 155.18  | 362.63  | 2.34 |
| H13: histocompatibility 13                                                                         | BB327773  | 103.17  | 240.96  | 2.34 |
| Klf12: Kruppel-like factor 12                                                                      | BM249597  | 765.05  | 1790.99 | 2.34 |
| Mm.192151.1                                                                                        | BE948333  | 228.33  | 534.14  | 2.34 |

|                                                                                                      |           |         |         |      |
|------------------------------------------------------------------------------------------------------|-----------|---------|---------|------|
| CDNA clone IMAGE:5690974                                                                             | BB604994  | 141.44  | 330.29  | 2.34 |
| Ppm1k: protein phosphatase 1K (PP2C domain containing)                                               | AK013741  | 279.1   | 652.59  | 2.34 |
| C130057M05Rik: RIKEN cDNA C130057M05 gene                                                            | BB371179  | 95.54   | 224     | 2.34 |
| Entpd5: ectonucleoside triphosphate diphosphohydrolase 5                                             | NM_007647 | 364.24  | 848.21  | 2.33 |
| Fhl2: four and a half LIM domains 2                                                                  | NM_010212 | 204.78  | 476.39  | 2.33 |
| Pygb: brain glycogen phosphorylase                                                                   | AW547988  | 1271.27 | 2959.28 | 2.33 |
| Lgi4: leucine-rich repeat LGI family, member 4                                                       | BB756793  | 83.85   | 195.32  | 2.33 |
| Lrrc16: leucine rich repeat containing 16                                                            | BC012229  | 309.67  | 720.44  | 2.33 |
| Depdc6: DEP domain containing 6                                                                      | AK014624  | 76.7    | 178.98  | 2.33 |
| 4930402H24Rik: RIKEN cDNA 4930402H24 gene                                                            | AK015050  | 344.16  | 801.26  | 2.33 |
| 4921505C17Rik: RIKEN cDNA 4921505C17 gene                                                            | BM123174  | 181.64  | 423.18  | 2.33 |
| 2810021J22Rik: RIKEN cDNA 2810021J22 gene                                                            | BB620330  | 168.13  | 391.39  | 2.33 |
| Cd82: CD82 antigen                                                                                   | NM_007656 | 120.94  | 280.78  | 2.32 |
| LOC664862: similar to transmembrane 7 superfamily member 1                                           | AK010724  | 116.33  | 270.21  | 2.32 |
| Igsf4c: immunoglobulin superfamily, member 4C                                                        | AY059394  | 1787.27 | 4145.7  | 2.32 |
| Tsc22d4: TSC22 domain family 4                                                                       | NM_023910 | 2311.62 | 5368.93 | 2.32 |
| 3110001I20Rik: RIKEN cDNA 3110001I20 gene                                                            | NM_133725 | 1552.18 | 3608.41 | 2.32 |
| Ptplad1: protein tyrosine phosphatase-like A domain containing 1                                     | BM950003  | 914.87  | 2120.04 | 2.32 |
| 8430427H17Rik: RIKEN cDNA 8430427H17 gene                                                            | AK018446  | 170.06  | 394.24  | 2.32 |
| Sorbs1: sorbin and SH3 domain containing 1                                                           | BQ176684  | 1458.39 | 3376.64 | 2.32 |
| E030016H06Rik: RIKEN cDNA E030016H06 gene                                                            | BB531351  | 172.77  | 400.15  | 2.32 |
| Csmd1: CUB and Sushi multiple domains 1                                                              | BB385992  | 79.29   | 183.86  | 2.32 |
| 2900011O08Rik: RIKEN cDNA 2900011O08 gene                                                            | BC022741  | 410.72  | 947.19  | 2.31 |
| Hipk2: homeodomain interacting protein kinase 2                                                      | AF170301  | 875.7   | 2018.63 | 2.31 |
| Tmem181: Transmembrane protein 181                                                                   | BG093881  | 135.1   | 312.36  | 2.31 |
| Cttnbp2: cortactin binding protein 2                                                                 | BB357317  | 83.65   | 193.17  | 2.31 |
| Cttnbp2: cortactin binding protein 2                                                                 | BB357580  | 364.09  | 840.68  | 2.31 |
| Glo1: glyoxalase 1                                                                                   | BM933153  | 117.47  | 271.01  | 2.31 |
| Bmpr1b: bone morphogenetic protein receptor, type 1B                                                 | BB698679  | 398.44  | 920.1   | 2.31 |
| A1875142: expressed sequence A1875142                                                                | BB355213  | 497.67  | 1150.75 | 2.31 |
| Centd1: Centaurin, delta 1                                                                           | BB211194  | 103.81  | 240.19  | 2.31 |
| Snap91: synaptosomal-associated protein 91                                                           | NM_013669 | 553.36  | 1270.81 | 2.3  |
| Cyp7b1: cytochrome P450, family 7, subfamily b, polypeptide 1                                        | NM_007825 | 166.61  | 382.99  | 2.3  |
| Ddb2: damage specific DNA binding protein 2                                                          | AY027937  | 124.56  | 285.9   | 2.3  |
| Itsn1: intersectin 1 (SH3 domain protein 1A)                                                         | BM248471  | 447.33  | 1026.93 | 2.3  |
| Smarca2: SWI/SNF related, matrix associated, actin dependent regulator of chromatin, subfamily a,    | BM230202  | 105.42  | 242.48  | 2.3  |
| Osbpl1a: oxysterol binding protein-like 1A                                                           | NM_020573 | 661.56  | 1522.21 | 2.3  |
| Grasp: GRP1 (general receptor for phosphoinositides 1)-associated scaffold protein                   | NM_019518 | 90.78   | 208.48  | 2.3  |
| Rgma: RGM domain family, member A                                                                    | BB827685  | 217.2   | 499.77  | 2.3  |
| Daam2: dishevelled associated activator of morphogenesis 2                                           | BM206030  | 161.51  | 372.08  | 2.3  |
| Transcribed locus                                                                                    | A1662750  | 142.4   | 327.89  | 2.3  |
| Dner: delta/notch-like EGF-related receptor                                                          | AF370126  | 1067.52 | 2447.64 | 2.29 |
| Apbb1: amyloid beta (A4) precursor protein-binding, family B, member 1                               | AF206720  | 651.38  | 1494.39 | 2.29 |
| Xpr1: xenotropic and polytropic retrovirus receptor 1                                                | AF131102  | 134.09  | 306.99  | 2.29 |
| Mm.56309.1                                                                                           | BQ174081  | 95.79   | 218.97  | 2.29 |
| C330002I19Rik: RIKEN cDNA C330002I19 gene                                                            | AK021172  | 110.32  | 252.8   | 2.29 |
| Ap1gbbp1: AP1 gamma subunit binding protein 1                                                        | BQ175330  | 130.47  | 298.37  | 2.29 |
| A1450236: expressed sequence A1450236                                                                | A1450236  | 291.1   | 666.56  | 2.29 |
| 6030451C04Rik: RIKEN cDNA 6030451C04 gene                                                            | BB040767  | 221.15  | 505.92  | 2.29 |
| Grina: glutamate receptor, ionotropic, N-methyl D-aspartate-associated protein 1 (glutamate binding) | NM_023168 | 551.17  | 1258.41 | 2.28 |
| Chga: chromogranin A                                                                                 | NM_007693 | 89.12   | 203.11  | 2.28 |
| Ppnr: per-pentamer repeat gene                                                                       | NM_012022 | 86.45   | 196.82  | 2.28 |
| Kcna6: potassium voltage-gated channel, shaker-related, subfamily, member 6                          | NM_013568 | 126.42  | 288.35  | 2.28 |
| Ina: internexin neuronal intermediate filament protein, alpha                                        | BC018383  | 147.22  | 335.35  | 2.28 |
| 2310022B05Rik: RIKEN cDNA 2310022B05 gene                                                            | BI328156  | 1478.27 | 3367.32 | 2.28 |
| Peli1: pellino 1                                                                                     | AK020915  | 242.92  | 554.86  | 2.28 |
| Transcribed locus, strongly similar to XP_990343.1 hypothetical protein [Mus musculus]               | AV303202  | 138.57  | 316.61  | 2.28 |
| Tcf7l2: Transcription factor 7-like 2, T-cell specific, HMG-box                                      | BI499715  | 130.35  | 296.78  | 2.28 |
| Mm.59170.1                                                                                           | AW123227  | 149.99  | 342.39  | 2.28 |
| 1110051B16Rik: RIKEN cDNA 1110051B16 gene                                                            | AV321065  | 230.93  | 525.83  | 2.28 |
| 2610020C11Rik: RIKEN cDNA 2610020C11 gene                                                            | AK011480  | 248.65  | 566.16  | 2.28 |
| Pdhx: Pyruvate dehydrogenase complex, component X                                                    | BM238649  | 117.63  | 268.43  | 2.28 |
| Mm.206843.1                                                                                          | C76618    | 269.46  | 610.71  | 2.27 |
| Npc1: Niemann Pick type C1                                                                           | BB769209  | 352.54  | 801.72  | 2.27 |
| Cpxm1: carboxypeptidase X 1 (M14 family)                                                             | NM_019696 | 310.72  | 704.94  | 2.27 |
| Clock: circadian locomotor output cycles kaput                                                       | AV290890  | 205.16  | 466.02  | 2.27 |
| Ick: intestinal cell kinase                                                                          | AK008991  | 166.25  | 376.58  | 2.27 |
| Osbpl1a: oxysterol binding protein-like 1A                                                           | NM_020573 | 374.1   | 845.81  | 2.26 |
| Atp8b1: ATPase, class I, type 8B, member 1                                                           | A1645547  | 87.48   | 197.36  | 2.26 |
| Dab1: disabled homolog 1 (Drosophila)                                                                | BB644109  | 195.03  | 440.86  | 2.26 |
| B230112C05Rik: RIKEN cDNA B230112C05 gene                                                            | BB476773  | 138.74  | 313.15  | 2.26 |
| 2810416A17Rik: RIKEN cDNA 2810416A17 gene                                                            | AK013094  | 280.06  | 633.09  | 2.26 |
| Adult male corpora quadrigemina cDNA, RIKEN full-length enriched library, clone:B230306E21 produ     | BB308630  | 98.53   | 222.64  | 2.26 |
| Mm.208960.1                                                                                          | BB386853  | 85.77   | 193.85  | 2.26 |
| Tmem181: Transmembrane protein 181                                                                   | BG076066  | 123.5   | 279.47  | 2.26 |
| C77713: expressed sequence C77713                                                                    | BB767153  | 119.47  | 269.6   | 2.26 |
| Lamp2: lysosomal membrane glycoprotein 2                                                             | NM_010685 | 954.83  | 2143.65 | 2.25 |
| Col4a5: procollagen, type IV, alpha 5                                                                | BM250666  | 237.45  | 533.33  | 2.25 |
| BC005471: cDNA sequence BC005471                                                                     | BC005471  | 182.72  | 410.45  | 2.25 |
| Itsn1: intersectin 1 (SH3 domain protein 1A)                                                         | AA172344  | 312.84  | 704.77  | 2.25 |
| 2810416G20Rik: RIKEN cDNA 2810416G20 gene                                                            | A1119761  | 211.64  | 476.45  | 2.25 |
| Btbd9: BTB (POZ) domain containing 9                                                                 | AV232817  | 170.82  | 383.59  | 2.25 |
| 0 day neonate head cDNA, RIKEN full-length enriched library, clone:4833431M13 product:unclassifia    | AV251542  | 760.21  | 1712.8  | 2.25 |
| Auh: AU RNA binding protein/enoyl-coenzyme A hydratase                                               | NM_016709 | 167.8   | 375.41  | 2.24 |
| Dep1: diabetic embryopathy 1                                                                         | BB626684  | 501.27  | 1125.08 | 2.24 |
| Ppap2b: phosphatidic acid phosphatase type 2B                                                        | AW111876  | 3062.23 | 6847.72 | 2.24 |
| Myo6: myosin VI                                                                                      | BE133806  | 898.15  | 2015.28 | 2.24 |
| Wipf1: WAS/WASL interacting protein family, member 1                                                 | C76969    | 256.32  | 573.24  | 2.24 |
| Mm.169240.1                                                                                          | AK020483  | 1443.1  | 3233.6  | 2.24 |



|                                                                                                  |           |         |         |      |
|--------------------------------------------------------------------------------------------------|-----------|---------|---------|------|
| Ddhd1: DDHD domain containing 1                                                                  | BB132393  | 118.56  | 265.4   | 2.24 |
| Eya1: eyes absent 1 homolog (Drosophila)                                                         | BB760085  | 308.28  | 691.15  | 2.24 |
| Pcdhb19: protocadherin beta 19                                                                   | NM_053144 | 93.25   | 207.78  | 2.23 |
| Cdc37l1: cell division cycle 37 homolog (S. cerevisiae)-like 1                                   | AK016651  | 285.74  | 636.97  | 2.23 |
| Eml5: echinoderm microtubule associated protein like 5                                           | AV230748  | 172.74  | 384.89  | 2.23 |
| Sash1: SAM and SH3 domain containing 1                                                           | BI658899  | 1709.5  | 3803.89 | 2.23 |
| Jundm2: Jun dimerization protein 2                                                               | NM_030887 | 227.07  | 506.26  | 2.23 |
| Gprc5b: G protein-coupled receptor, family C, group 5, member B                                  | BC020004  | 620.56  | 1385.78 | 2.23 |
| 1110003F05Rik: RIKEN cDNA 1110003F05 gene                                                        | BB659256  | 1308.78 | 2913.74 | 2.23 |
| Cd109: CD109 antigen                                                                             | AV246882  | 448.92  | 999.29  | 2.23 |
| Ddx26b: DEAD/H (Asp-Glu-Ala-Asp/His) box polypeptide 26B                                         | BM239943  | 183.12  | 407.93  | 2.23 |
| 12 days embryo spinal ganglion cDNA, RIKEN full-length enriched library, clone:D130065P14 produc | BB460243  | 331.47  | 740.48  | 2.23 |
| 12 days embryo eyeball cDNA, RIKEN full-length enriched library, clone:D230024G22 product:unclas | BB408626  | 189.3   | 421.83  | 2.23 |
| D630040G17Rik /// LOC622675: RIKEN cDNA D630040G17 gene /// similar to zinc finger protein 64    | BB346556  | 188.49  | 421.15  | 2.23 |
| Maao: monoamine oxidase A                                                                        | AV356118  | 347.84  | 776.45  | 2.23 |
| Alox12e: arachidonate lipoxygenase, epidermal                                                    | BM116762  | 84.97   | 189.38  | 2.23 |
| Zfpm2: Zinc finger protein, multitype 2                                                          | BB248611  | 98.91   | 220.59  | 2.23 |
| Ntrk2: neurotrophic tyrosine kinase, receptor, type 2                                            | AK018789  | 1947.14 | 4323.35 | 2.22 |
| 5133401N09Rik: RIKEN cDNA 5133401N09 gene                                                        | BC026742  | 404.63  | 900.21  | 2.22 |
| 6330442E10Rik: RIKEN cDNA 6330442E10 gene                                                        | AV328515  | 159     | 353.61  | 2.22 |
| Agpat3: 1-acylglycerol-3-phosphate O-acyltransferase 3                                           | AV296997  | 358.87  | 797.14  | 2.22 |
| B930006L02Rik: RIKEN cDNA B930006L02 gene                                                        | BB699417  | 284.83  | 631.63  | 2.22 |
| Ctnna2: Catenin (cadherin associated protein), alpha 2                                           | BG073826  | 111.06  | 246.35  | 2.22 |
| Maf: avian musculoaponeurotic fibrosarcoma (v-maf) AS42 oncogene homolog                         | AV323441  | 117.82  | 261.95  | 2.22 |
| 2410024N18Rik: RIKEN cDNA 2410024N18 gene                                                        | AK010587  | 132.17  | 292.85  | 2.22 |
| Malat1: Metastasis associated lung adenocarcinoma transcript 1 (non-coding RNA)                  | AF146523  | 3537.81 | 7836.17 | 2.21 |
| Tax1bp1: Tax1 (human T-cell leukemia virus type I) binding protein 1                             | C85320    | 188.65  | 416.83  | 2.21 |
| 9130208E07Rik: RIKEN cDNA 9130208E07 gene                                                        | BC026435  | 163.47  | 360.88  | 2.21 |
| Cxx1c: CAAX box 1 homolog C (human)                                                              | NM_028375 | 253.87  | 560.76  | 2.21 |
| Bicd1: bicaudal D homolog 1 (Drosophila)                                                         | BC016192  | 168.13  | 372.4   | 2.21 |
| BB128963: expressed sequence BB128963                                                            | BG071933  | 638.27  | 1407.84 | 2.21 |
| Ralgds: ral guanine nucleotide dissociation stimulator                                           | NM_009058 | 369.57  | 817.23  | 2.21 |
| 1110003O08Rik: RIKEN cDNA 1110003O08 gene                                                        | AK003388  | 168.77  | 372.33  | 2.21 |
| Camsap111: calmodulin regulated spectrin-associated protein 1-like 1                             | AK005444  | 1158.39 | 2558.96 | 2.21 |
| 2810013P06Rik: RIKEN cDNA 2810013P06 gene                                                        | BM246000  | 123.95  | 274.29  | 2.21 |
| 1500005P14Rik: RIKEN cDNA 1500005P14 gene                                                        | BQ174720  | 1233.75 | 2732    | 2.21 |
| Ptprn2: Protein tyrosine phosphatase, receptor type, N polypeptide 2                             | BI794694  | 174.26  | 385.54  | 2.21 |
| Trio: Triple functional domain (PTPRF interacting)                                               | BG066763  | 307.34  | 678.05  | 2.21 |
| D430039N05Rik: RIKEN cDNA D430039N05 gene                                                        | BE980088  | 691.16  | 1527.8  | 2.21 |
| LOC669787: similar to Protein enabled homolog (NPC-derived proline-rich protein 1) (NDPP-1)      | BM205932  | 239.52  | 528.87  | 2.21 |
| Kif13a: kinesin family member 13A                                                                | BF166390  | 483     | 1066.95 | 2.21 |
| Zfyve27: zinc finger, FYVE domain containing 27                                                  | BB780581  | 136.22  | 300.46  | 2.21 |
| AA591059: Expressed sequence AA591059                                                            | BQ031479  | 746.34  | 1651.39 | 2.21 |
| Anxa7: annexin A7                                                                                | BC008997  | 97.54   | 215.03  | 2.2  |
| Acaa1a /// Acaa1b: acetyl-Coenzyme A acyltransferase 1A /// acetyl-Coenzyme A acyltransferase 1E | NM_130864 | 379.97  | 837.75  | 2.2  |
| Nap15: nucleosome assembly protein 1-like 5                                                      | NM_021432 | 1392.7  | 3057.3  | 2.2  |
| Gprc5b: G protein-coupled receptor, family C, group 5, member B                                  | BC020004  | 436.93  | 959.8   | 2.2  |
| Rab4a: RAB4A, member RAS oncogene family                                                         | NM_009003 | 286.09  | 629.75  | 2.2  |
| Elov4: elongation of very long chain fatty acids (FEN1/Elo2, SUR4/Elo3, yeast)-like 4            | BB829575  | 341.43  | 752.36  | 2.2  |
| Gria2: glutamate receptor, ionotropic, AMPA2 (alpha 2)                                           | BB749143  | 764.08  | 1679.87 | 2.2  |
| Gpr23: G protein-coupled receptor 23                                                             | BB297502  | 139.36  | 306.24  | 2.2  |
| Zfp609: Zinc finger protein 609                                                                  | BB533591  | 174.21  | 383.33  | 2.2  |
| Thsd4: thrombospondin, type I, domain containing 4                                               | BB211377  | 165.53  | 364.09  | 2.2  |
| Zfp182: zinc finger protein 182                                                                  | BM248637  | 114.17  | 250.62  | 2.2  |
| Mccc1: methylcrotonoyl-Coenzyme A carboxylase 1 (alpha)                                          | NM_023644 | 269.78  | 590.08  | 2.19 |
| Mkrm1: makorin, ring finger protein, 1                                                           | BQ176661  | 436.3   | 956.83  | 2.19 |
| Sgip1: SH3-domain GRB2-like (endophilin) interacting protein 1                                   | AV344708  | 166.84  | 365.26  | 2.19 |
| Lrp1: low density lipoprotein receptor-related protein 1                                         | NM_008512 | 509.73  | 1117.18 | 2.19 |
| Xpr1: xenotropic and polytropic retrovirus receptor 1                                            | AA215024  | 324.48  | 710.23  | 2.19 |
| Thra: thyroid hormone receptor alpha                                                             | BI076689  | 1497.28 | 3276.53 | 2.19 |
| Ldhd: lactate dehydrogenase B                                                                    | AV216324  | 1406.72 | 3081.12 | 2.19 |
| A930009E05Rik: RIKEN cDNA A930009E05 gene                                                        | BB125806  | 354.21  | 775.89  | 2.19 |
| Cdc2l6: cell division cycle 2-like 6 (CDK8-like)                                                 | BB510904  | 385.47  | 844.24  | 2.19 |
| 1110003E01Rik: RIKEN cDNA 1110003E01 gene                                                        | BB701294  | 407.47  | 893.92  | 2.19 |
| Lrrtm2: Leucine rich repeat transmembrane neuronal 2                                             | AI851755  | 199.88  | 437.62  | 2.19 |
| Papola: Poly (A) polymerase alpha                                                                | AU040876  | 184.12  | 402.61  | 2.19 |
| 6720467C03Rik: RIKEN cDNA 6720467C03 gene                                                        | AV350862  | 185.4   | 406.32  | 2.19 |
| Apba1: amyloid beta (A4) precursor protein binding, family A, member 1                           | BQ174146  | 149.43  | 326.85  | 2.19 |
| Elov4: elongation of very long chain fatty acids (FEN1/Elo2, SUR4/Elo3, yeast)-like 4            | BB829575  | 472.67  | 1030.46 | 2.18 |
| Itp2: inositol 1,4,5-triphosphate receptor 2                                                     | BC013815  | 261.01  | 568.7   | 2.18 |
| Mlc1: megalencephalic leukoencephalopathy with subcortical cysts 1 homolog (human)               | NM_133241 | 1339.35 | 2914.28 | 2.18 |
| Sept4: septin 4                                                                                  | NM_011129 | 94.5    | 206.32  | 2.18 |
| Kcnk2: potassium channel, subfamily K, member 2                                                  | NM_010607 | 572.46  | 1249.03 | 2.18 |
| 4732435N03Rik: RIKEN cDNA 4732435N03 gene                                                        | AV371987  | 100.11  | 218.39  | 2.18 |
| Socs3: suppressor of cytokine signaling 3                                                        | BB241535  | 141.51  | 308.58  | 2.18 |
| Cyld: cylindromatosis (turban tumor syndrome)                                                    | BM119209  | 198.07  | 431.86  | 2.18 |
| Marcks: Myristoylated alanine rich protein kinase C substrate                                    | AV304251  | 135.87  | 296.79  | 2.18 |
| Trp53bp2: transformation related protein 53 binding protein 2                                    | BB814564  | 229.35  | 499.5   | 2.18 |
| Tmcc1: transmembrane and coiled coil domains 1                                                   | BB137519  | 106.05  | 231.19  | 2.18 |
| Tmem58: transmembrane protein 58                                                                 | BF468228  | 404.3   | 882.06  | 2.18 |
| Dleu2: Deleted in lymphocytic leukemia, 2                                                        | BG069906  | 237.99  | 518.25  | 2.18 |
| Gm88: gene model 88, (NCBI)                                                                      | BB026554  | 86.36   | 188.46  | 2.18 |
| Ulk2: Unc-51 like kinase 2 (C. elegans)                                                          | NM_013881 | 643.59  | 1398.83 | 2.17 |
| 2810432L12Rik: RIKEN cDNA 2810432L12 gene                                                        | BC013800  | 358.57  | 776.68  | 2.17 |
| Cask: calcium/calmodulin-dependent serine protein kinase (MAGUK family)                          | Y17137    | 605.02  | 1315.17 | 2.17 |
| RP23-136K12.4: putative phosphatase                                                              | BB530223  | 85.63   | 186.12  | 2.17 |
| Chst11 /// Phactr1: carbohydrate sulfotransferase 11 /// phosphatase and actin regulator 1       | AV259240  | 161     | 348.64  | 2.17 |
| Ccp1: cell cycle progression 1                                                                   | C85100    | 246.43  | 535.1   | 2.17 |
| Rwdd2: RWD domain containing 2                                                                   | AK006533  | 104.41  | 227.04  | 2.17 |

|                                                                                                            |           |         |         |      |
|------------------------------------------------------------------------------------------------------------|-----------|---------|---------|------|
| D430041D05Rik: RIKEN cDNA D430041D05 gene                                                                  | AU067644  | 159.98  | 347.79  | 2.17 |
| 2700008G24Rik: RIKEN cDNA 2700008G24 gene                                                                  | AW495672  | 115.85  | 250.97  | 2.17 |
| Otdp7b: OTU domain containing 7B                                                                           | BM235074  | 118.17  | 256.62  | 2.17 |
| Gdap11: ganglioside-induced differentiation-associated protein 1-like 1                                    | BC019941  | 217.27  | 469.14  | 2.16 |
| Hipk2: homeodomain interacting protein kinase 2                                                            | AF208292  | 551.38  | 1190.25 | 2.16 |
| Trio: triple functional domain (PTPRF interacting)                                                         | BB080177  | 1348.72 | 2919.28 | 2.16 |
| Pcmttd1: protein-L-isospartate (D-aspartate) O-methyltransferase domain containing 1                       | BB549335  | 341.84  | 738.05  | 2.16 |
| Vcam1: vascular cell adhesion molecule 1                                                                   | BB250384  | 1027.7  | 2218.78 | 2.16 |
| Ldhd: lactate dehydrogenase B                                                                              | NM_008492 | 1585.66 | 3417.27 | 2.16 |
| Ngef: neuronal guanine nucleotide exchange factor                                                          | NM_019867 | 156.68  | 338.05  | 2.16 |
| Naga: N-acetyl galactosaminidase, alpha                                                                    | BC021631  | 172.58  | 372.38  | 2.16 |
| Mpz1: myelin protein zero-like 1                                                                           | AK003513  | 1156.58 | 2495.73 | 2.16 |
| Maml2: Mastermind like 2 (Drosophila)                                                                      | BB209820  | 279.19  | 603.5   | 2.16 |
| AW049604: expressed sequence AW049604                                                                      | BB804965  | 326.8   | 701.97  | 2.15 |
| Ctnn1: catenin (cadherin associated protein), alpha-like 1                                                 | BQ031240  | 184.84  | 397.73  | 2.15 |
| Gria2: glutamate receptor, ionotropic, AMPA2 (alpha 2)                                                     | NM_013540 | 1192.2  | 2567.56 | 2.15 |
| Map4k5: mitogen-activated protein kinase kinase kinase kinase 5                                            | BG067961  | 627.5   | 1351.21 | 2.15 |
| Bcas3: breast carcinoma amplified sequence 3                                                               | AK011603  | 180.42  | 388.29  | 2.15 |
| Rap2b: RAP2B, member of RAS oncogene family                                                                | BB645629  | 367.21  | 789.53  | 2.15 |
| Dicer1: Dicer1, Dcr-1 homolog (Drosophila)                                                                 | BM208197  | 371.71  | 799.06  | 2.15 |
| Mgat5: mannoside acetylglucosaminyltransferase 5                                                           | AK015544  | 946.7   | 2039.63 | 2.15 |
| Tmcc1: transmembrane and coiled coil domains 1                                                             | AI506779  | 241.63  | 520.49  | 2.15 |
| Epha5: Eph receptor A5                                                                                     | NM_007937 | 115.58  | 247.06  | 2.14 |
| Rprm: reprimin, TP53 dependent G2 arrest mediator candidate                                                | NM_023396 | 689.74  | 1478.55 | 2.14 |
| Reep3: receptor accessory protein 3                                                                        | AK005026  | 1035.87 | 2218.17 | 2.14 |
| D130054N24Rik: RIKEN cDNA D130054N24 gene                                                                  | AV254847  | 331.98  | 709.57  | 2.14 |
| D130054N24Rik: RIKEN cDNA D130054N24 gene                                                                  | NM_008869 | 269.58  | 576.61  | 2.14 |
| Cla2g4a: phospholipase A2, group IVA (cytosolic, calcium-dependent)                                        | BC025112  | 136.76  | 292.68  | 2.14 |
| Pyhr1: cysteine and histidine rich 1                                                                       | BC022959  | 350.77  | 752.11  | 2.14 |
| Acs16: acyl-CoA synthetase long-chain family member 6                                                      | BB279767  | 279.21  | 596.14  | 2.14 |
| 9130404D08Rik: RIKEN cDNA 9130404D08 gene                                                                  | BB782729  | 304.82  | 653.72  | 2.14 |
| Slitrk5: SLIT and NTRK-like family, member 5                                                               | BM233265  | 228.33  | 487.78  | 2.14 |
| Usp3: ubiquitin specific peptidase 3                                                                       | BM121149  | 879.43  | 1877.94 | 2.14 |
| Peli2: pellino 2                                                                                           | BB448266  | 147.6   | 315.44  | 2.14 |
| D030065N23Rik: RIKEN cDNA D030065N23 gene                                                                  | AW542748  | 130.95  | 280.69  | 2.14 |
| A1848218: expressed sequence A1848218                                                                      | BM238642  | 123.47  | 264.65  | 2.14 |
| Mm.215460.1                                                                                                | BB247577  | 204.82  | 435.75  | 2.13 |
| AU042671: expressed sequence AU042671                                                                      | BB337121  | 174.53  | 371.7   | 2.13 |
| Peli2: pellino 2                                                                                           | BB698249  | 141.82  | 302.12  | 2.13 |
| 3 days neonate thymus cDNA, RIKEN full-length enriched library, clone:A630033C13 product:unclassified      | BE945021  | 141.32  | 300.57  | 2.13 |
| Transcribed locus                                                                                          | BM234464  | 197.5   | 421.59  | 2.13 |
| Ppap2b: Phosphatidic acid phosphatase type 2B                                                              | AV278072  | 813.6   | 1729.1  | 2.13 |
| Mm.189645.1                                                                                                | BI734045  | 203.28  | 432.98  | 2.13 |
| 6430547I21Rik: RIKEN cDNA 6430547I21 gene                                                                  | BB527078  | 138.77  | 295.76  | 2.13 |
| Fry: furry homolog (Drosophila)                                                                            | AV342748  | 136.2   | 289.99  | 2.13 |
| Adult male olfactory brain cDNA, RIKEN full-length enriched library, clone:6430530M09 product:unclassified | AU080586  | 1530.98 | 3249.46 | 2.12 |
| Map1c3b: microtubule-associated protein 1 light chain 3 beta                                               | BB817847  | 250.64  | 530.11  | 2.12 |
| Osgin2: oxidative stress induced growth inhibitor family member 2                                          | BB771462  | 423.58  | 897.85  | 2.12 |
| Stxbp4: syntaxin binding protein 4                                                                         | AW124912  | 199.17  | 421.69  | 2.12 |
| Rfesd: Rieske (Fe-S) domain containing                                                                     | BG092467  | 124.13  | 263.19  | 2.12 |
| 4921505C17Rik: RIKEN cDNA 4921505C17 gene                                                                  | BB473497  | 120.41  | 254.89  | 2.12 |
| Mkln1: Musklin 1, intracellular mediator containing kelch motifs                                           | BB015113  | 159.55  | 338.73  | 2.12 |
| 6430524H05Rik: RIKEN cDNA 6430524H05 gene                                                                  | BG069189  | 130.98  | 277.82  | 2.12 |
| Macf1: Microtubule-actin crosslinking factor 1                                                             | BM054266  | 107.42  | 226.55  | 2.11 |
| Fuca2: fucosidase, alpha-L-2, plasma                                                                       | AB015422  | 263.32  | 554.89  | 2.11 |
| Dtx1: deltex 1 homolog (Drosophila)                                                                        | AK005965  | 102.58  | 216.39  | 2.11 |
| Ica1: islet cell autoantigen 1                                                                             | BB794924  | 355.65  | 748.95  | 2.11 |
| Wdfy2: WD repeat and FYVE domain containing 2                                                              | BB095517  | 375.92  | 795.04  | 2.11 |
| Spg21: spastic paraplegia 21 homolog (human)                                                               | BC006662  | 184.26  | 389.13  | 2.11 |
| BC006662: cDNA sequence BC006662                                                                           | BB003384  | 248.36  | 524.94  | 2.11 |
| Elavl1: ELAV (embryonic lethal, abnormal vision, Drosophila)-like 1 (Hu antigen R)                         | AV333459  | 172.69  | 364.61  | 2.11 |
| Atpaf1: ATP synthase mitochondrial F1 complex assembly factor 1                                            | BE136147  | 169.86  | 358.23  | 2.11 |
| Tnrc15: trinuclotide repeat containing 15                                                                  | BB144876  | 125.54  | 265.29  | 2.11 |
| Mm.212804.1                                                                                                | BB755434  | 179.31  | 377.72  | 2.11 |
| Elavl1: ELAV (embryonic lethal, abnormal vision, Drosophila)-like 1 (Hu antigen R)                         | AV298746  | 192.3   | 405.04  | 2.11 |
| Mbd5: methyl-CpG binding domain protein 5                                                                  | BF466605  | 157.36  | 331.94  | 2.11 |
| 1700025K23Rik: RIKEN cDNA 1700025K23 gene                                                                  | AK011963  | 757.57  | 1594.47 | 2.1  |
| Prdx2: peroxiredoxin 2                                                                                     | BB462665  | 1038.26 | 2179.08 | 2.1  |
| Atp1a2: ATPase, Na+/K+ transporting, alpha 2 polypeptide                                                   | AK016370  | 107.04  | 224.86  | 2.1  |
| Pftk1: PFTAIRES protein kinase 1                                                                           | BB769866  | 148.57  | 311.71  | 2.1  |
| Igfbp1: immunoglobulin superfamily, member 21                                                              | AI504908  | 1084.02 | 2279.4  | 2.1  |
| 5033414K04Rik: RIKEN cDNA 5033414K04 gene                                                                  | AV009179  | 136.07  | 285.33  | 2.1  |
| A930005H10Rik: RIKEN cDNA A930005H10 gene                                                                  | BB358264  | 245.23  | 514.68  | 2.1  |
| C030027H14Rik: RIKEN cDNA C030027H14 gene                                                                  | BB466434  | 488.46  | 1024.67 | 2.1  |
| A830010M09Rik: RIKEN cDNA A830010M09 gene                                                                  | AK013194  | 170.59  | 357.53  | 2.1  |
| Arsk: arylsulfatase K                                                                                      | AK018248  | 305.88  | 643.64  | 2.1  |
| Tcba1: T-cell lymphoma breakpoint associated target 1                                                      | BB461988  | 321.36  | 673.85  | 2.1  |
| Podxl2: podocalyxin-like 2                                                                                 | BM116703  | 97.03   | 203.3   | 2.1  |
| 4921517N04Rik: RIKEN cDNA 4921517N04 gene                                                                  | NM_009837 | 109.25  | 228.09  | 2.09 |
| Cct4: chaperonin subunit 4 (delta)                                                                         | BQ176661  | 323.28  | 674.34  | 2.09 |
| Mkrm1: makorin, ring finger protein, 1                                                                     | BQ031240  | 386.1   | 806.18  | 2.09 |
| Ctnn1: catenin (cadherin associated protein), alpha-like 1                                                 | BC012260  | 166.02  | 347.38  | 2.09 |
| Psmf1: proteasome (prosome, macropain) inhibitor subunit 1                                                 | BM248471  | 485.31  | 1014.67 | 2.09 |
| Itsn1: intersectin 1 (SH3 domain protein 1A)                                                               | BB533903  | 1831.61 | 3819.94 | 2.09 |
| Hist1h1c: histone cluster 1, H1c                                                                           | NM_033037 | 123.18  | 257.35  | 2.09 |
| Cdo1: cysteine dioxygenase 1, cytosolic                                                                    | BB648600  | 376.09  | 786.99  | 2.09 |
| Rtn4: reticulon 4                                                                                          | AV226590  | 147.49  | 308.72  | 2.09 |
| Transcribed locus                                                                                          | AI508470  | 170.64  | 356.26  | 2.09 |
| 4921505C17Rik: RIKEN cDNA 4921505C17 gene                                                                  | BG076094  | 500.27  | 1043.12 | 2.09 |
| Rab11fp2: RAB11 family interacting protein 2 (class I)                                                     |           |         |         |      |

|                                                                                                                 |           |         |         |      |
|-----------------------------------------------------------------------------------------------------------------|-----------|---------|---------|------|
| Tuba4: tubulin, alpha 4                                                                                         | AW491660  | 326.31  | 678.4   | 2.08 |
| Pxmp2: peroxisomal membrane protein 2                                                                           | AF309644  | 230.13  | 478.68  | 2.08 |
| Pscd1: pleckstrin homology, Sec7 and coiled-coil domains 1                                                      | AB013464  | 690.95  | 1436.92 | 2.08 |
| Acvr2b: activin receptor IIB                                                                                    | NM_007397 | 119.78  | 248.97  | 2.08 |
| Mtap6: microtubule-associated protein 6                                                                         | NM_010837 | 130.39  | 270.6   | 2.08 |
| Cdk5: cyclin-dependent kinase 5                                                                                 | NM_007668 | 95.23   | 198.25  | 2.08 |
| Mm.28885.1                                                                                                      | BB409668  | 200.49  | 417.02  | 2.08 |
| Snx30: sorting nexin family member 30                                                                           | BB320376  | 156.39  | 325.63  | 2.08 |
| D10Ert641e: DNA segment, Chr 10, ERATO Doi 641, expressed                                                       | BE692118  | 120.56  | 250.58  | 2.08 |
| Map3k7ip2: mitogen-activated protein kinase kinase 7 interacting protein 2                                      | BM213179  | 785.86  | 1636.21 | 2.08 |
| Klhl24: kelch-like 24 (Drosophila)                                                                              | BC021407  | 265.93  | 552.44  | 2.08 |
| Gnptg: N-acetylglucosamine-1-phosphotransferase, gamma subunit                                                  | BI965034  | 336.71  | 701.9   | 2.08 |
| Mklin1: Muskelin 1, intracellular mediator containing kelch motifs                                              | BG068971  | 187.06  | 388.35  | 2.08 |
| Mapre2: Microtubule-associated protein, RP/EB family, member 2                                                  | BE956567  | 105.79  | 219.84  | 2.08 |
| Zkscan1: zinc finger with KRAB and SCAN domains 1                                                               | BB006473  | 160.35  | 333.38  | 2.08 |
| Lphn3: latrophilin 3                                                                                            | BB317079  | 151.72  | 315.2   | 2.08 |
| Pes1: pescadillo homolog 1, containing BRCT domain (zebrafish)                                                  | BC004844  | 237.44  | 491.68  | 2.07 |
| Ldhd: lactate dehydrogenase B                                                                                   | NM_008492 | 1489.37 | 3078.9  | 2.07 |
| Otud7b: OTU domain containing 7B                                                                                | AK013730  | 165.81  | 342.48  | 2.07 |
| Ldhd: lactate dehydrogenase B                                                                                   | AV219418  | 1655.72 | 3431.26 | 2.07 |
| Fech: ferrochelatase                                                                                            | NM_007998 | 365.41  | 757.1   | 2.07 |
| D0H4S114: DNA segment, human D4S114                                                                             | D45203    | 1755.19 | 3639.02 | 2.07 |
| Pik3r1: phosphatidylinositol 3-kinase, regulatory subunit, polypeptide 1 (p85 alpha)                            | M60651    | 325.84  | 675.7   | 2.07 |
| Mapre2: microtubule-associated protein, RP/EB family, member 2                                                  | BC027056  | 314.15  | 650.71  | 2.07 |
| Srr: serine racemase                                                                                            | BQ173986  | 370.65  | 768.13  | 2.07 |
| Tmem118: transmembrane protein 118                                                                              | BB334927  | 97.76   | 202.71  | 2.07 |
| Lhfp14: lipoma HMGIC fusion partner-like protein 4                                                              | BQ180632  | 453.27  | 938.63  | 2.07 |
| 5530601H04Rik: RIKEN cDNA 5530601H04 gene                                                                       | BB820846  | 315.55  | 653.62  | 2.07 |
| Papad1a: phosphatidic acid phosphatase type 2 domain containing 1A                                              | BB360564  | 205.64  | 425.19  | 2.07 |
| ORF34: open reading frame 34                                                                                    | BM237456  | 841.21  | 1739.06 | 2.07 |
| A1595406: expressed sequence A1595406                                                                           | A1595406  | 192.96  | 399.79  | 2.07 |
| Pip5k2c: phosphatidylinositol-4-phosphate 5-kinase, type II, gamma                                              | NM_054097 | 287.71  | 593.68  | 2.06 |
| Pde4dip: phosphodiesterase 4D interacting protein (myomegalin)                                                  | NM_031401 | 110.19  | 226.92  | 2.06 |
| Ina: internexin neuronal intermediate filament protein, alpha                                                   | BC018383  | 286.5   | 590.12  | 2.06 |
| Wdr45: WD repeat domain 45                                                                                      | BC011479  | 236.56  | 487.48  | 2.06 |
| Zcchc18: zinc finger, CCHC domain containing 18                                                                 | BC017627  | 705.59  | 1455.96 | 2.06 |
| Grina: glutamate receptor, ionotropic, N-methyl D-aspartate-associated protein 1 (glutamate binding)            | AW212189  | 1099.77 | 2260.75 | 2.06 |
| Ctsl: cathepsin L                                                                                               | J02583    | 2199.31 | 4537.38 | 2.06 |
| Centd1: centaurin, delta 1                                                                                      | BB182934  | 395.63  | 815.29  | 2.06 |
| 6430547I21Rik: RIKEN cDNA 6430547I21 gene                                                                       | BM932705  | 151.4   | 312.52  | 2.06 |
| Pdzrn3: PDZ domain containing RING finger 3                                                                     | NM_018884 | 887.07  | 1821.58 | 2.05 |
| Abhd12: abhydrolase domain containing 12                                                                        | NM_024465 | 661.28  | 1353.63 | 2.05 |
| Zkscan1: zinc finger with KRAB and SCAN domains 1                                                               | NM_133906 | 771.25  | 1582.68 | 2.05 |
| Mmp16: matrix metalloproteinase 16                                                                              | AF282844  | 189.16  | 387.44  | 2.05 |
| Dcamk1l: doublecortin and calcium/calmodulin-dependent protein kinase-like 1                                    | AW105916  | 837.57  | 1716.36 | 2.05 |
| Pcmdt2: protein-L-isoaspartate (D-aspartate) O-methyltransferase domain containing 2                            | BM117243  | 832.92  | 1706.52 | 2.05 |
| 4930504E06Rik: RIKEN cDNA 4930504E06 gene                                                                       | BB010153  | 443.15  | 906.86  | 2.05 |
| Srr: serine racemase                                                                                            | BB020681  | 150.22  | 308.19  | 2.05 |
| Tst: thiosulfate sulfurtransferase, mitochondrial                                                               | BC005644  | 623.24  | 1277.51 | 2.05 |
| Thrap2: thyroid hormone receptor associated protein 2                                                           | BG074645  | 677.88  | 1388.96 | 2.05 |
| Mm.213340.1                                                                                                     | AV365231  | 151.55  | 310.03  | 2.05 |
| 16 days embryo head cDNA, RIKEN full-length enriched library, clone:C130070I23 product:unclassified             | BB373481  | 144.22  | 295.86  | 2.05 |
| Adcy5: adenylate cyclase 5                                                                                      | BE952286  | 161.92  | 332.59  | 2.05 |
| Mm.88433.1                                                                                                      | A1447822  | 136.93  | 280.35  | 2.05 |
| Arf2: ADP-ribosylation factor 2                                                                                 | NM_007477 | 429.63  | 875.31  | 2.04 |
| Usp2: ubiquitin specific peptidase 2                                                                            | A1553394  | 254.93  | 519.03  | 2.04 |
| Dcx: doublecortin                                                                                               | BB418548  | 610.74  | 1248.1  | 2.04 |
| Abca7: ATP-binding cassette, sub-family A (ABC1), member 7                                                      | NM_013850 | 117.76  | 240.11  | 2.04 |
| Eps8: epidermal growth factor receptor pathway substrate 8                                                      | NM_007945 | 340.19  | 692.94  | 2.04 |
| Urm1: ubiquitin related modifier 1 homolog (S. cerevisiae)                                                      | BC026994  | 275.75  | 561.89  | 2.04 |
| Hnt: neurotrimin                                                                                                | AF282980  | 527.73  | 1076.55 | 2.04 |
| Reep5: receptor accessory protein 5                                                                             | BI249075  | 873.84  | 1780.52 | 2.04 |
| Rap2a: RAS related protein 2a                                                                                   | BC025198  | 957.37  | 1951.87 | 2.04 |
| Mkrn1: makorin, ring finger protein, 1                                                                          | AA717142  | 1093.99 | 2227.59 | 2.04 |
| Usp22: ubiquitin specific peptidase 22                                                                          | BE951601  | 458.78  | 936.47  | 2.04 |
| Tmem106b: transmembrane protein 106B                                                                            | AV025807  | 283.19  | 579.11  | 2.04 |
| Adult male corpora quadrigenina cDNA, RIKEN full-length enriched library, clone:B230209O07 product:unclassified | BB765910  | 119.62  | 243.81  | 2.04 |
| Dep1: diabetic embryopathy 1                                                                                    | BB088198  | 892.18  | 1816.97 | 2.04 |
| Tmem40: transmembrane protein 40                                                                                | BB468188  | 98.34   | 200.13  | 2.04 |
| Zfx1b: Zinc finger homeobox 1b                                                                                  | BB488200  | 211.45  | 430.83  | 2.04 |
| Dnaj4: DnaJ (Hsp40) homolog, subfamily A, member 4                                                              | NM_021422 | 97.58   | 198.28  | 2.03 |
| C430004E15Rik: RIKEN cDNA C430004E15 gene                                                                       | BF582414  | 193.18  | 391.29  | 2.03 |
| Map4k5: mitogen-activated protein kinase kinase kinase 5                                                        | BC002309  | 309.82  | 630.06  | 2.03 |
| Leng8: leukocyte receptor cluster (LRC) member 8                                                                | AV024387  | 229.11  | 464.31  | 2.03 |
| Gabbr1: gamma-aminobutyric acid (GABA-B) receptor, 1                                                            | BM114422  | 331.29  | 671.29  | 2.03 |
| Mm.218611.2                                                                                                     | BF537798  | 3863.74 | 7847.51 | 2.03 |
| Gdap1: ganglioside-induced differentiation-associated-protein 1                                                 | AU017649  | 196.09  | 398.56  | 2.03 |
| 4632432E15Rik: RIKEN cDNA 4632432E15 gene                                                                       | AK014604  | 142.02  | 288.06  | 2.03 |
| Mm.81940.1                                                                                                      | AV118079  | 398.05  | 808.24  | 2.03 |
| Cxxc4: CXXC finger 4                                                                                            | BM114956  | 184.79  | 375.03  | 2.03 |
| Ppm2c: protein phosphatase 2C, magnesium dependent, catalytic subunit                                           | AV290622  | 116.49  | 237.01  | 2.03 |
| A330068G13Rik: RIKEN cDNA A330068G13 gene                                                                       | BB246530  | 137.08  | 278.63  | 2.03 |
| Scmh1: Sex comb on midleg homolog 1                                                                             | BB297140  | 115.79  | 234.6   | 2.03 |
| Zfand5: zinc finger, AN1-type domain 5                                                                          | AW744618  | 97.63   | 197.74  | 2.03 |
| Rufy3: RUN and FYVE domain containing 3                                                                         | AV221343  | 388.69  | 789.91  | 2.03 |
| Centd1: centaurin, delta 1                                                                                      | AV291818  | 227.85  | 463.42  | 2.03 |
| Csmd2: CUB and Sushi multiple domains 2                                                                         | BB309617  | 240.99  | 489.66  | 2.03 |
| Ndr3: N-myc downstream regulated gene 3                                                                         | BE631549  | 534.82  | 1077.89 | 2.02 |
| Ulk2: Unc-51 like kinase 2 (C. elegans)                                                                         | NM_013881 | 344.68  | 697.45  | 2.02 |

|                                                                                             |           |        |         |      |
|---------------------------------------------------------------------------------------------|-----------|--------|---------|------|
| Skap2: src family associated phosphoprotein 2                                               | NM_018773 | 278.75 | 562.51  | 2.02 |
| Dll1: delta-like 1 (Drosophila)                                                             | NM_007865 | 740.54 | 1496.26 | 2.02 |
| Jmy: junction-mediating and regulatory protein                                              | BF227962  | 106.88 | 215.89  | 2.02 |
| BC019943: cDNA sequence BC019943                                                            | BB467190  | 164.18 | 330.87  | 2.02 |
| Mapre2: microtubule-associated protein, RP/EB family, member 2                              | BC027056  | 398.75 | 803.95  | 2.02 |
| Mrpl15: mitochondrial ribosomal protein L15                                                 | AV306676  | 478.3  | 964.49  | 2.02 |
| Sema4g: sema domain, immunoglobulin domain (Ig), transmembrane domain (TM) and short cytopl | NM_011976 | 150.09 | 303.81  | 2.02 |
| BC030863: cDNA sequence BC030863                                                            | BB698852  | 245.61 | 496.49  | 2.02 |
| Rab11fp2: RAB11 family interacting protein 2 (class I)                                      | BG076094  | 209.41 | 423.75  | 2.02 |
| Nudt10: nudix (nucleoside diphosphate linked moiety X)-type motif 10                        | AI853080  | 281.81 | 570.6   | 2.02 |
| Prdm16: PR domain containing 16                                                             | BB796293  | 116.71 | 235.51  | 2.02 |
| 5033414K04Rik: RIKEN cDNA 5033414K04 gene                                                   | BB394466  | 159.16 | 322.17  | 2.02 |
| Scyl3: SCY1-like 3 (S. cerevisiae)                                                          | BB274851  | 313.43 | 633.21  | 2.02 |
| Rab36: RAB36, member RAS oncogene family                                                    | BB313586  | 168.74 | 341.25  | 2.02 |
| Dnajc12: DnaJ (Hsp40) homolog, subfamily C, member 12                                       | NM_013888 | 242.12 | 487.43  | 2.01 |
| Kctd5: potassium channel tetramerisation domain containing 5                                | BF577853  | 941.23 | 1891.12 | 2.01 |
| Ccdc80: coiled-coil domain containing 80                                                    | BG074158  | 977.28 | 1961.23 | 2.01 |
| Pik3r1: phosphatidylinositol 3-kinase, regulatory subunit, polypeptide 1 (p85 alpha)        | M60651    | 824.19 | 1653.86 | 2.01 |
| Hnt: neurotrimin                                                                            | AF282980  | 521.98 | 1051.56 | 2.01 |
| Deb1: differentially expressed in B16F10 1                                                  | AK003863  | 1179.9 | 2374.59 | 2.01 |
| Taok3: TAO kinase 3                                                                         | BB194075  | 269.1  | 539.74  | 2.01 |
| Mm.212712.4                                                                                 | BG966742  | 451.96 | 909.61  | 2.01 |
| Wwc2: WW, C2 and coiled-coil domain containing 2                                            | NM_133791 | 334.24 | 673     | 2.01 |
| Aylt2: acyltransferase like 2                                                               | BG068664  | 607.53 | 1222.18 | 2.01 |
| Rbm20: RNA binding motif protein 20                                                         | AK003783  | 99.04  | 199.11  | 2.01 |
| AW456874: expressed sequence AW456874                                                       | BB194539  | 101.07 | 202.76  | 2.01 |
| D430047L21Rik: RIKEN cDNA D430047L21 gene                                                   | AV325177  | 266.73 | 536.86  | 2.01 |
| Nsun3: NOL1/NOP2/Sun domain family 3                                                        | BF682821  | 144.72 | 290.53  | 2.01 |
| D630045J12Rik: RIKEN cDNA D630045J12 gene                                                   | AW558117  | 231.26 | 465.67  | 2.01 |
| Aldh5a1: aldehyde dehydrogenase family 5, subfamily A1                                      | BQ175320  | 440.21 | 885.29  | 2.01 |
| Exoc3: exocyst complex component 3                                                          | BF457860  | 527.67 | 1060.59 | 2.01 |
| Snapap: SNAP-associated protein                                                             | BB667523  | 864.33 | 1730.9  | 2    |
| Gm2a: GM2 ganglioside activator protein                                                     | BC004651  | 379.23 | 758.78  | 2    |
| Hexim1: hexamethylene bis-acetamide inducible 1                                             | BI411874  | 207.03 | 414.11  | 2    |
| Camk2g: calcium/calmodulin-dependent protein kinase II gamma                                | BM227770  | 502.7  | 1005.5  | 2    |
| Sox9: SRY-box containing gene 9                                                             | BC024958  | 664.66 | 1328.78 | 2    |
| Cry2: cryptochrome 2 (photolyase-like)                                                      | BF303057  | 240.71 | 482.43  | 2    |
| Ptpn13: protein tyrosine phosphatase, non-receptor type 13                                  | BM236743  | 245.34 | 491.58  | 2    |
| Atp1a2: ATPase, Na <sup>+</sup> /K <sup>+</sup> transporting, alpha 2 polypeptide           | AI845177  | 605.64 | 1212.76 | 2    |
| Klh124: kelch-like 24 (Drosophila)                                                          | BB328076  | 195.91 | 391.82  | 2    |
| Tieg3: TGFB inducible early growth response 3                                               | BB137387  | 253.31 | 507.23  | 2    |
| Phf2011: PHD finger protein 20-like 1                                                       | BB268102  | 415.43 | 831.32  | 2    |
| Snx30: sorting nexin family member 30                                                       | BB359719  | 266.46 | 533.09  | 2    |
| 4933407C03Rik: RIKEN cDNA 4933407C03 gene                                                   | AW555091  | 161.39 | 322.81  | 2    |
